# Supplementary material
Source: PubMed Central journal article supplement (PMC4302202)

Ch:1 0330-vbb85-td248-0001.tif

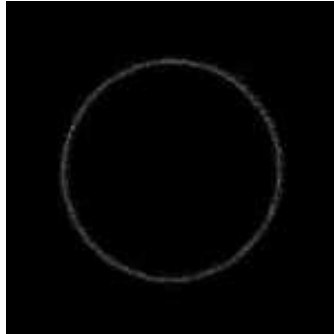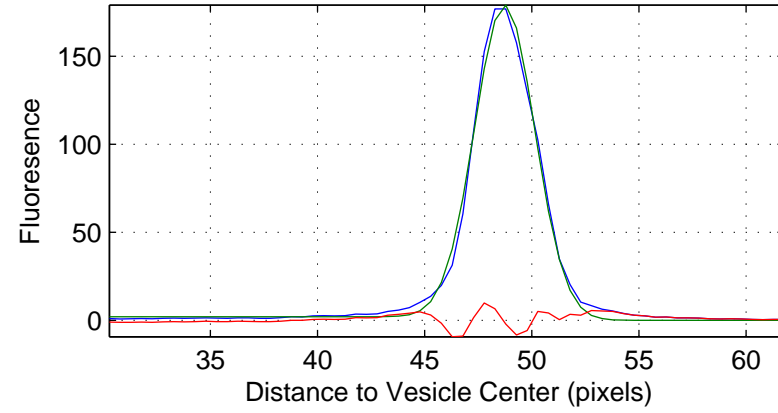

Ch:2 0330-vbb85-td248-0001.tif

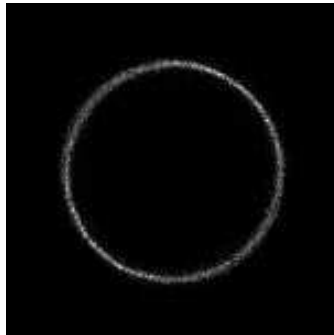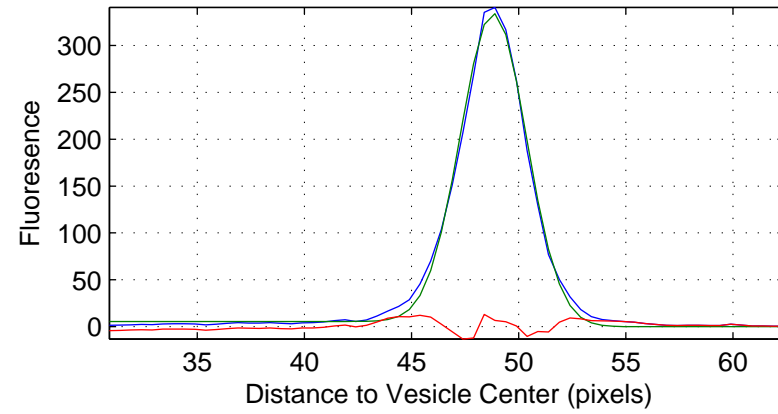

Ch:3 0330-vbb85-td248-0001.tif

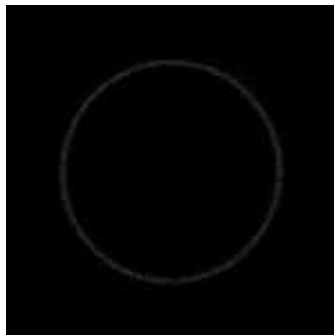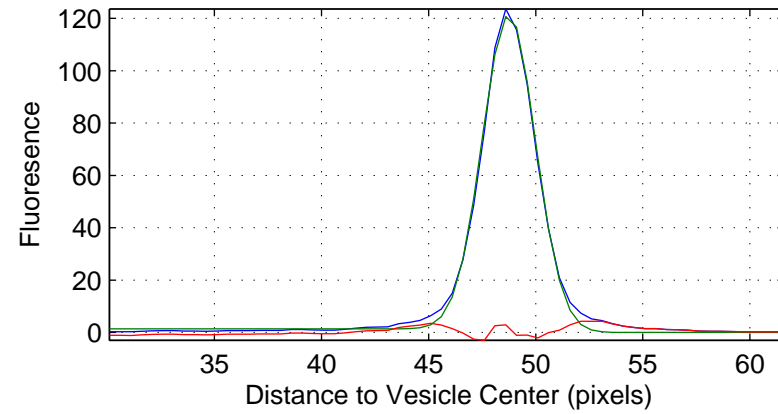

Ch:1 0330-vbb85-td248-0003.tif

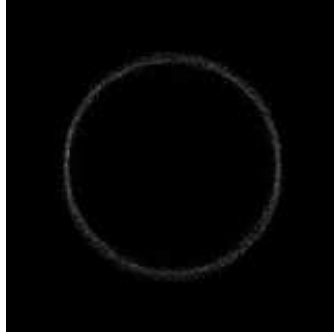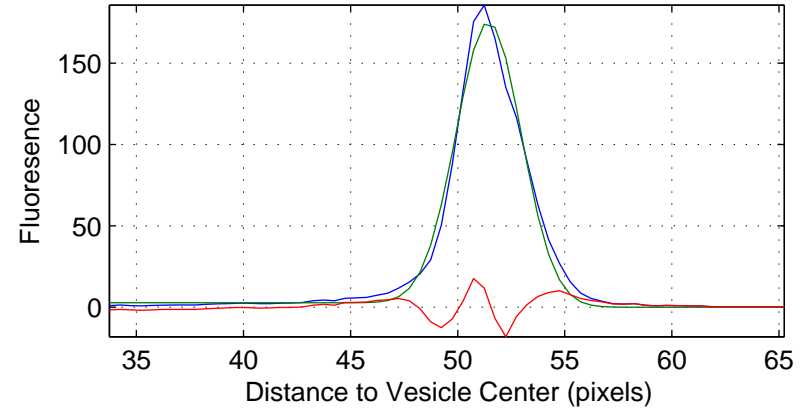

Ch:2 0330-vbb85-td248-0003.tif

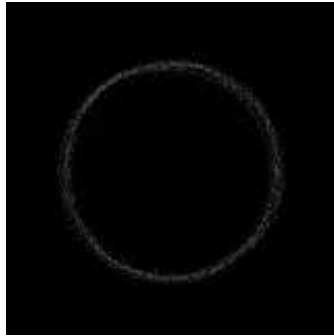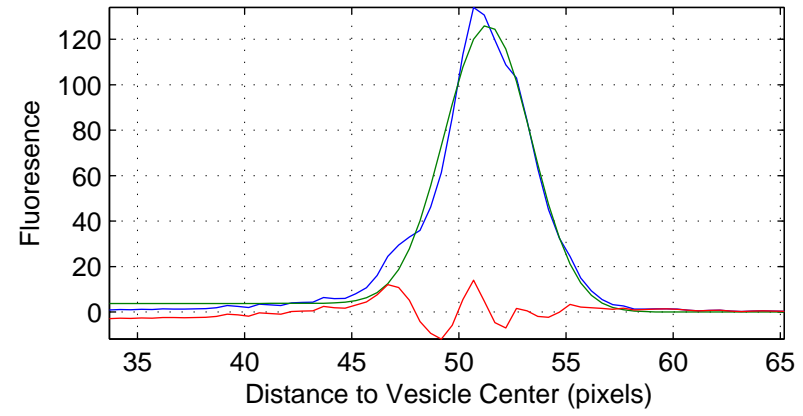

Ch:3 0330-vbb85-td248-0003.tif

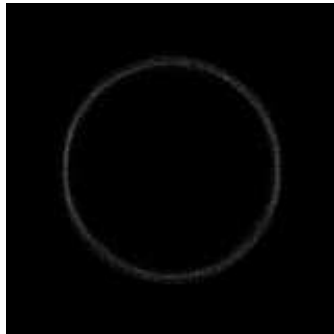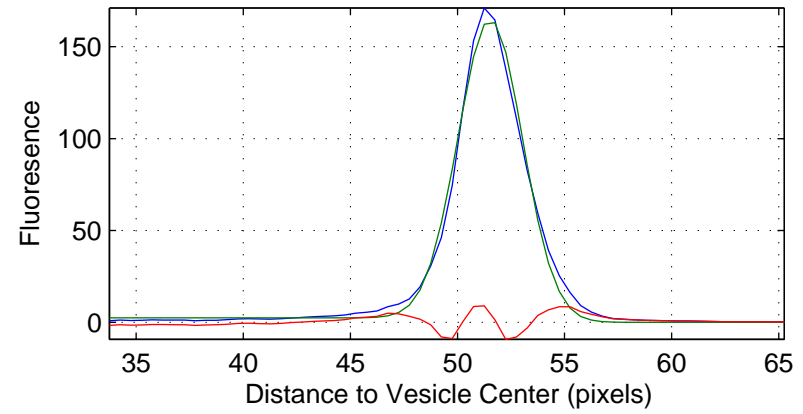

Ch:1 0330-vbb85-td248-0017.tif

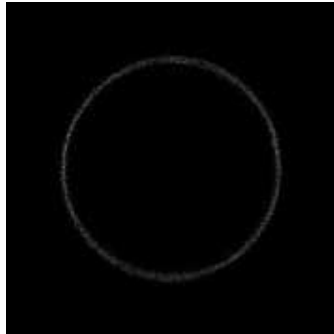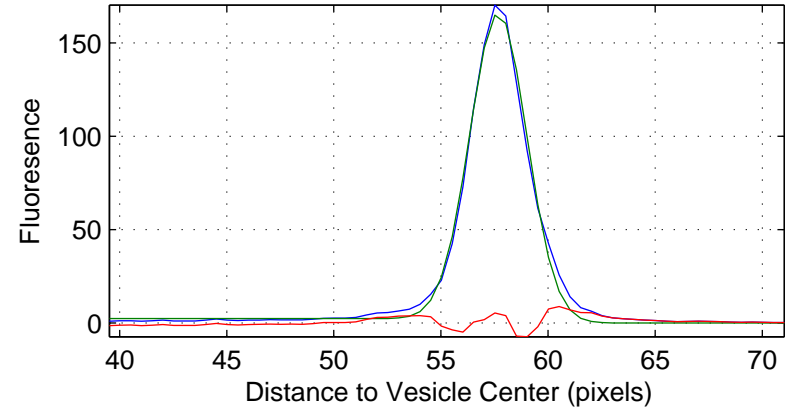

Ch:2 0330-vbb85-td248-0017.tif

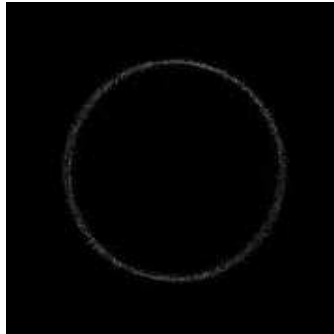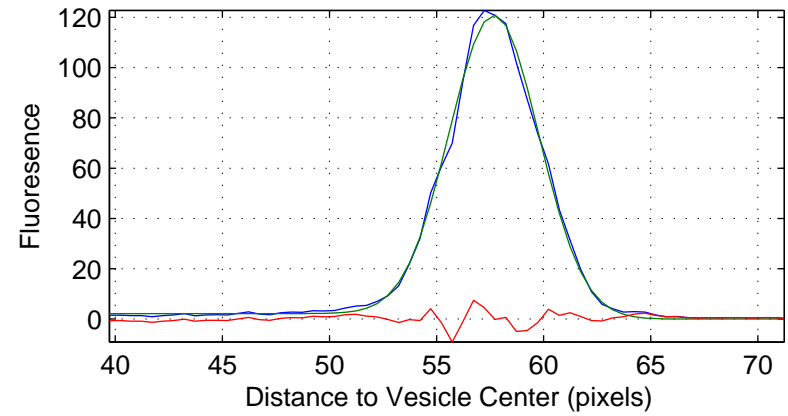

Ch:3 0330-vbb85-td248-0017.tif

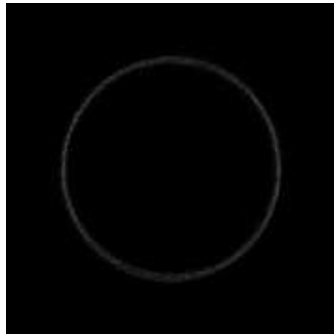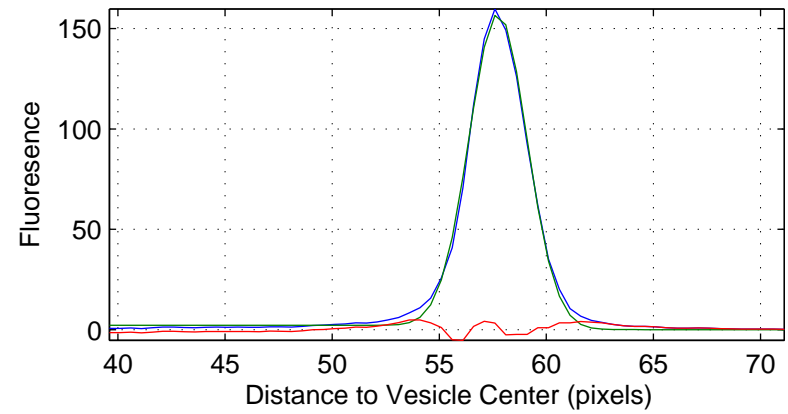

Ch:1 0330-vbb85-td248-0019.tif

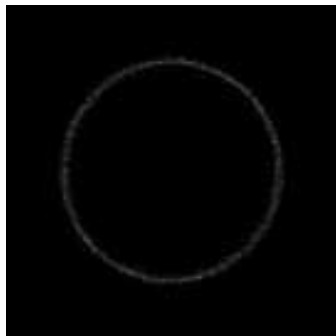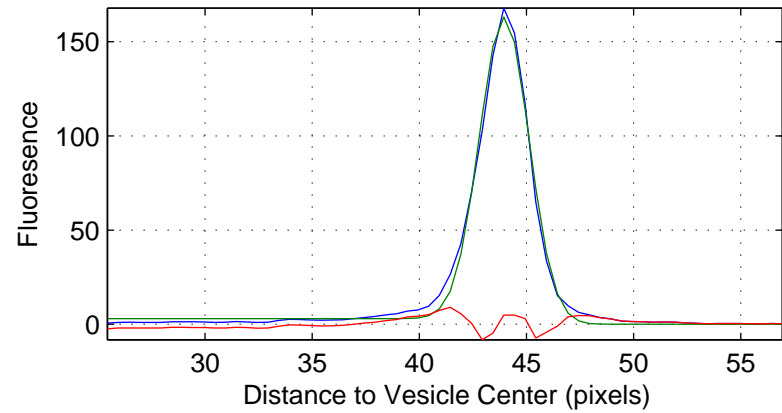

Ch:2 0330-vbb85-td248-0019.tif

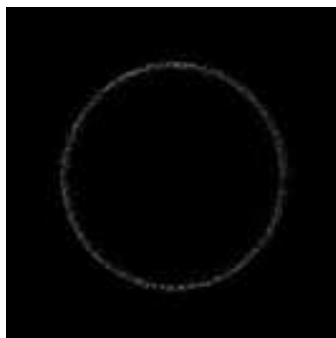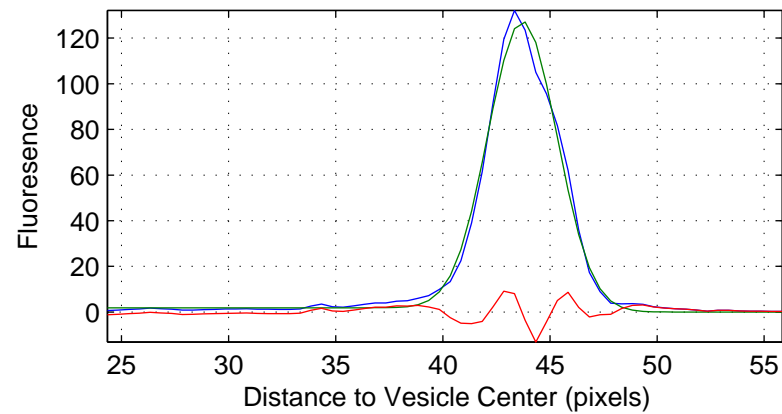

Ch:3 0330-vbb85-td248-0019.tif

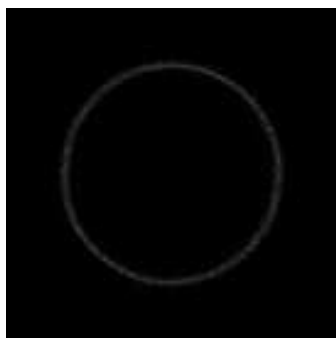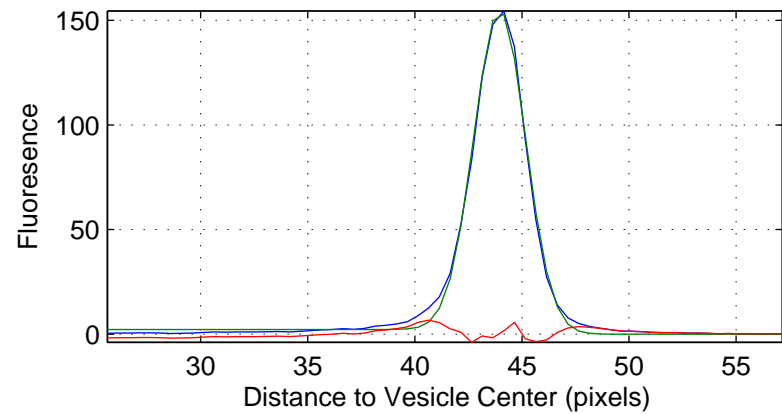

Ch:1 0330-vbb85-td248-0021.tif

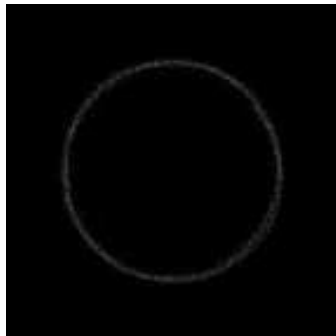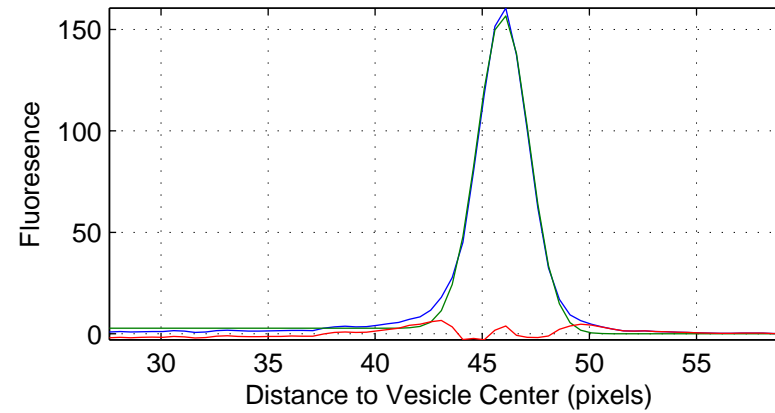

Ch:2 0330-vbb85-td248-0021.tif

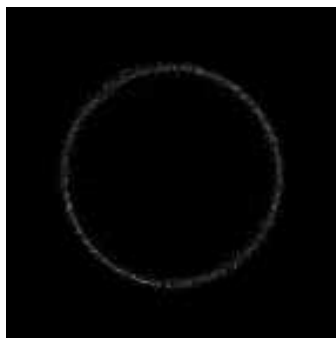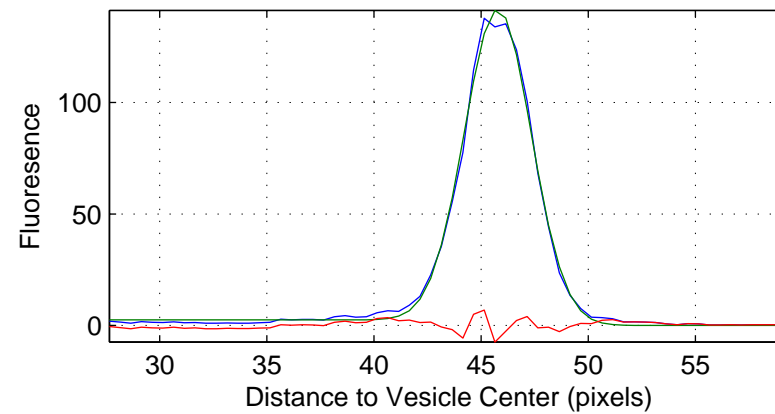

Ch:3 0330-vbb85-td248-0021.tif

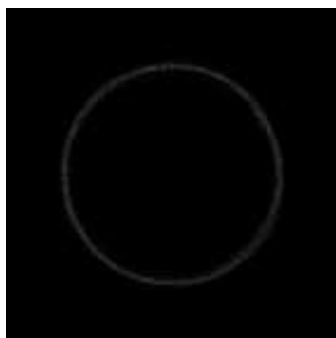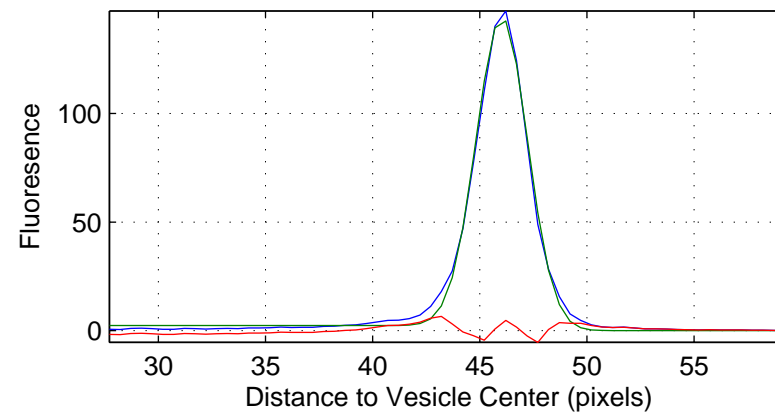

Ch:1 0330-vbb85-td248-0023.tif

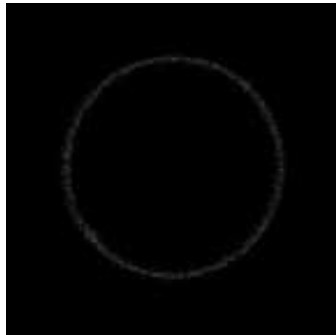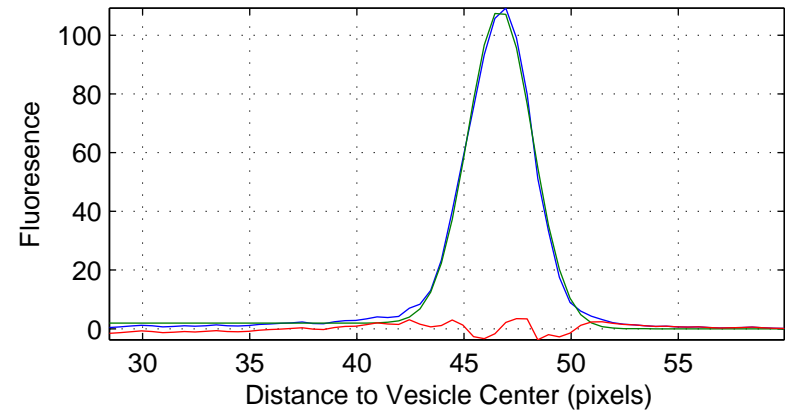

Ch:2 0330-vbb85-td248-0023.tif

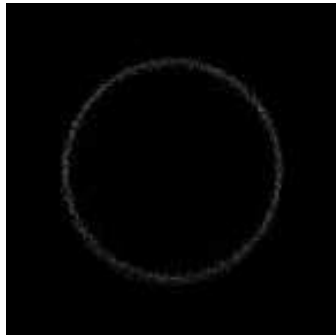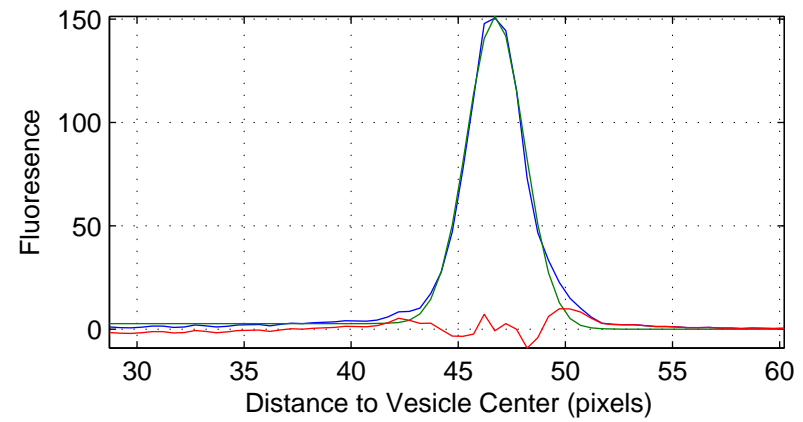

Ch:3 0330-vbb85-td248-0023.tif

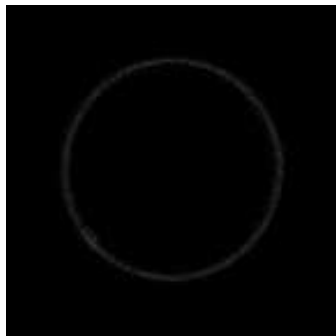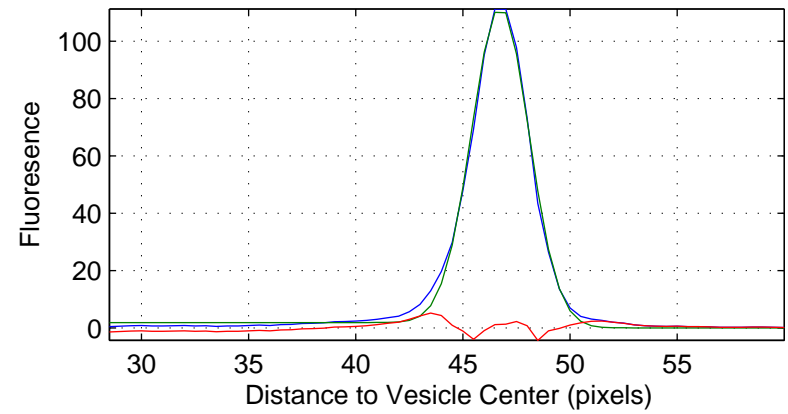

Ch:1 0330-vbb85-td248-0033.tif

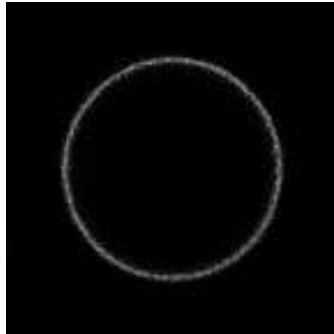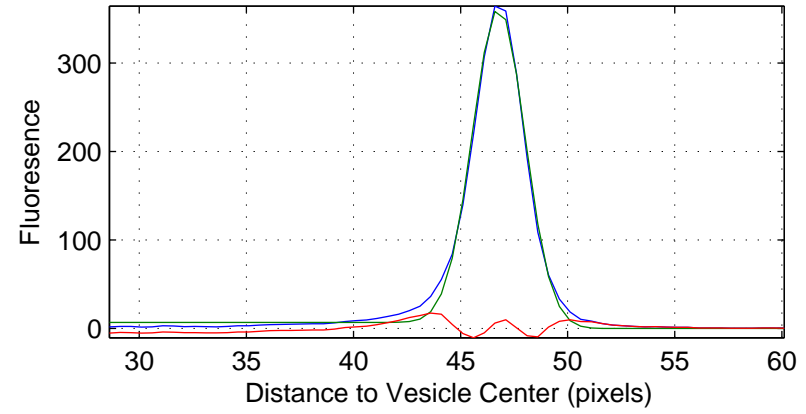

Ch:2 0330-vbb85-td248-0033.tif

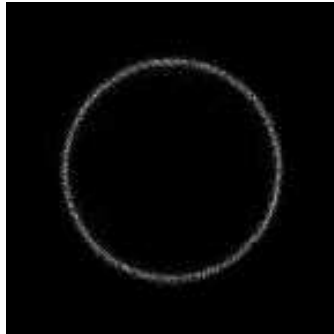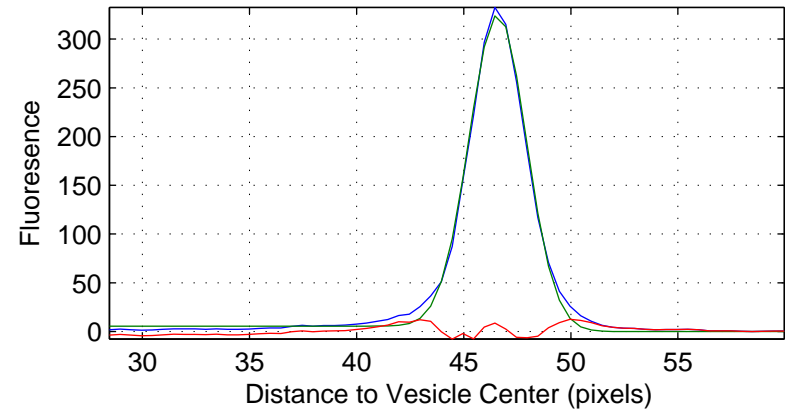

Ch:3 0330-vbb85-td248-0033.tif

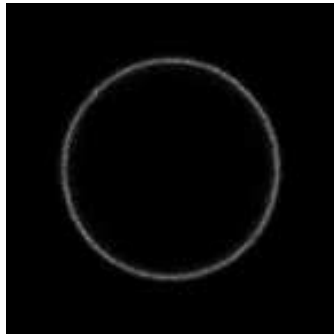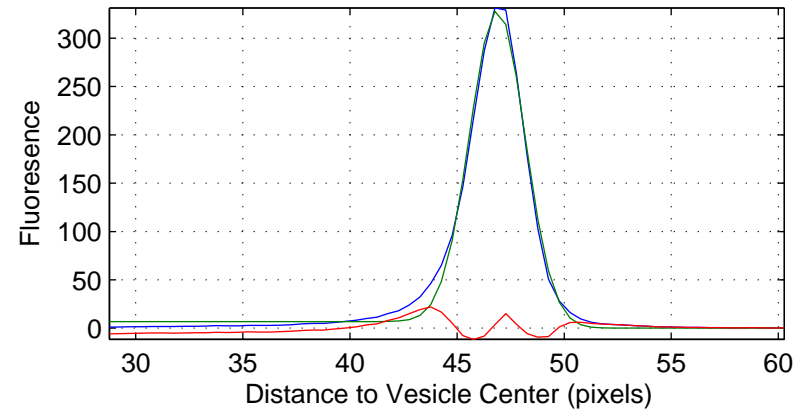

Ch:1 0330-vbb85-td248-0045.tif

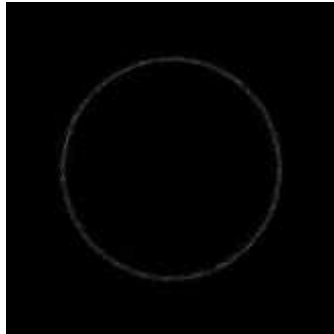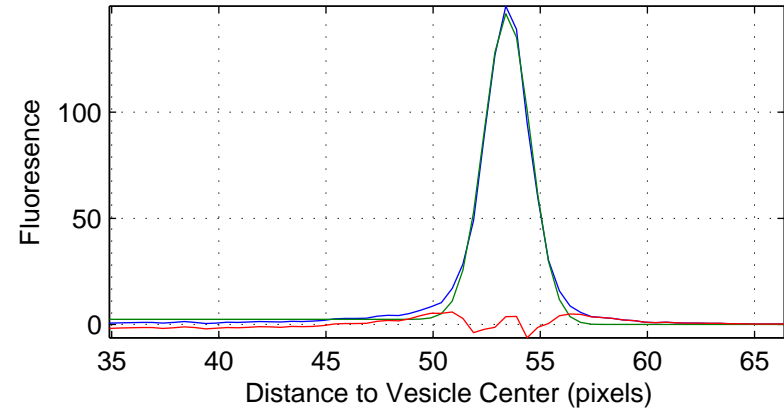

Ch:2 0330-vbb85-td248-0045.tif

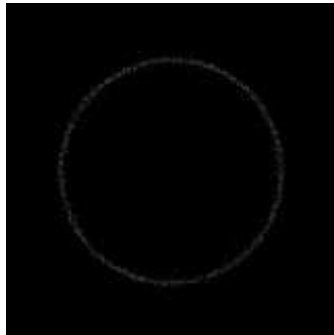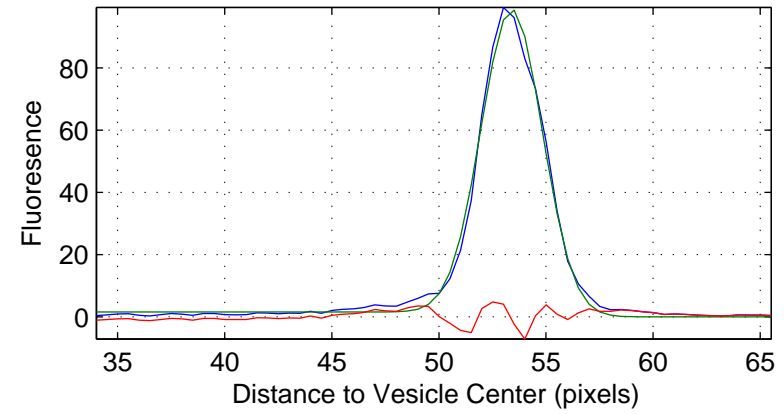

Ch:3 0330-vbb85-td248-0045.tif

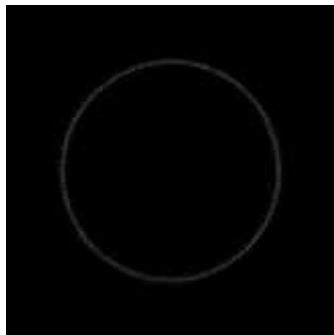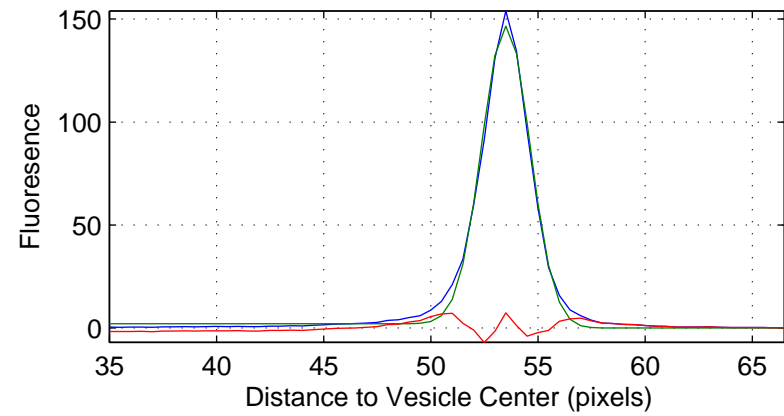



Ch:1 0330-vbb85-td248-0047.tif

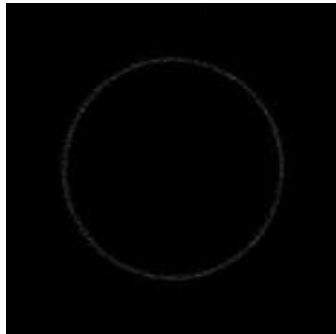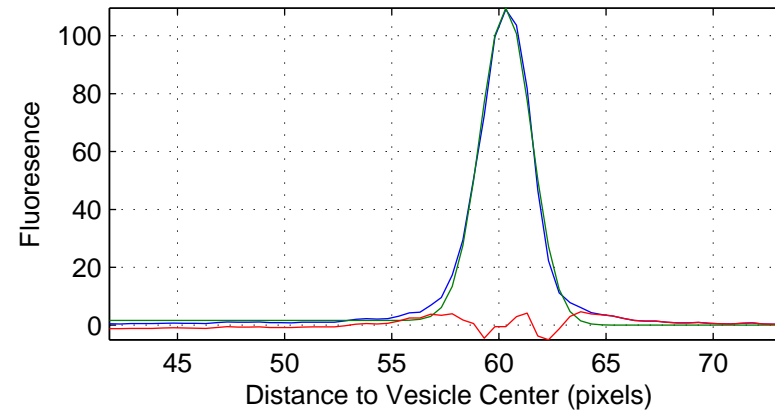

Ch:2 0330-vbb85-td248-0047.tif

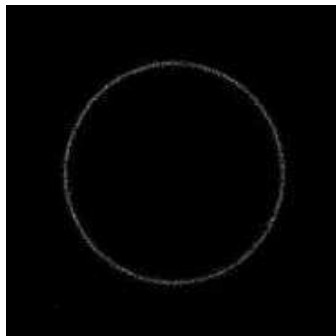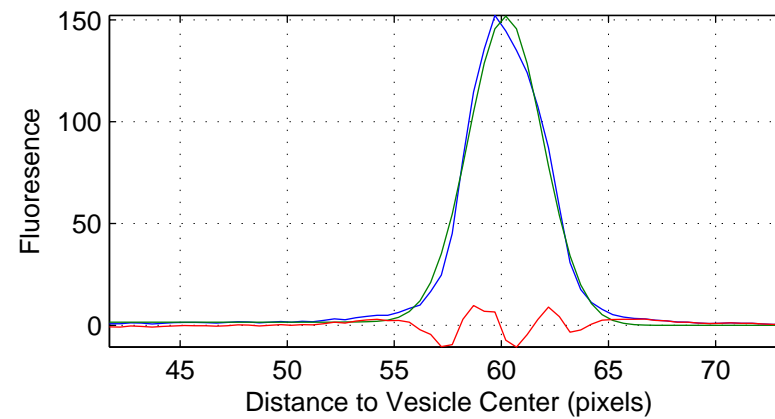

Ch:3 0330-vbb85-td248-0047.tif

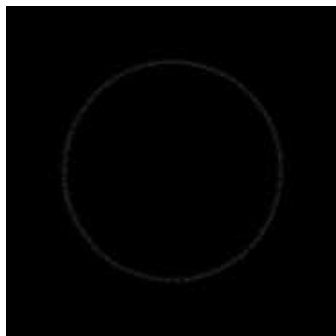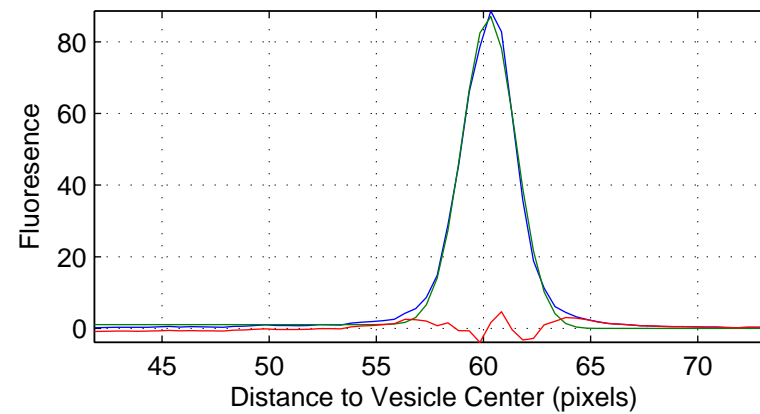

Ch:1 0330-vbb85-td248-0049.tif

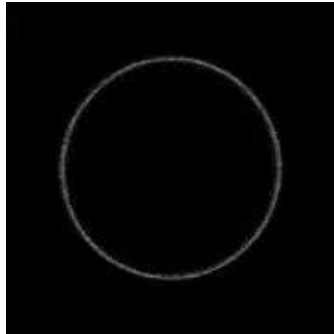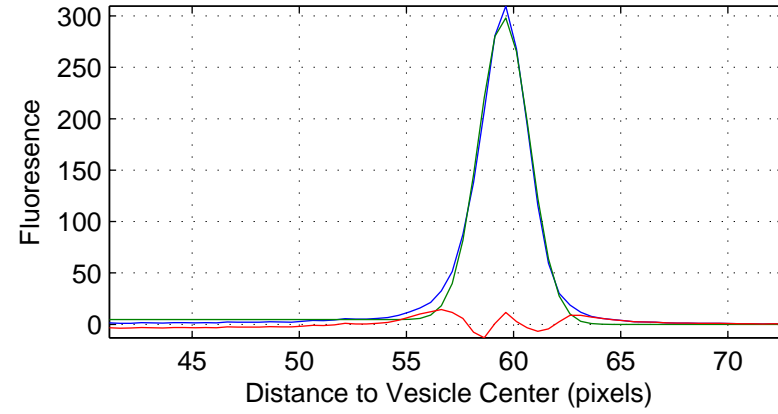

Ch:2 0330-vbb85-td248-0049.tif

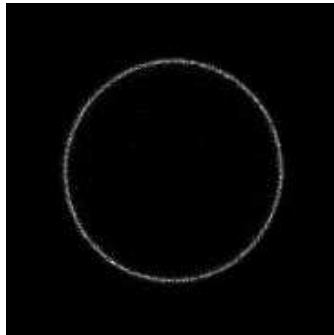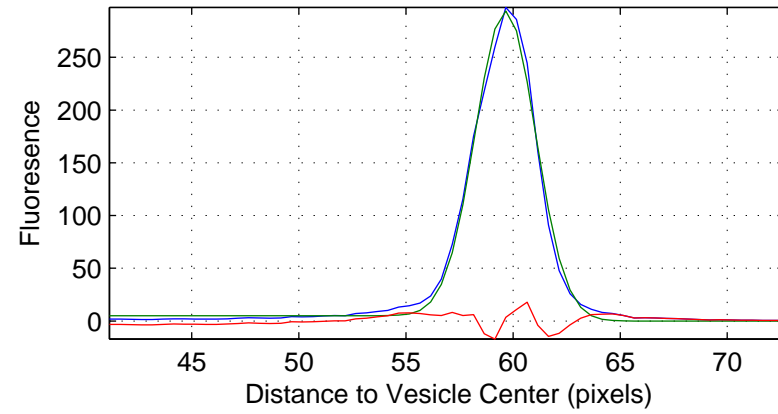

Ch:3 0330-vbb85-td248-0049.tif

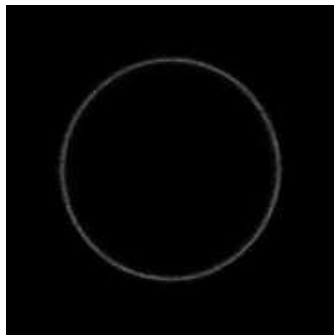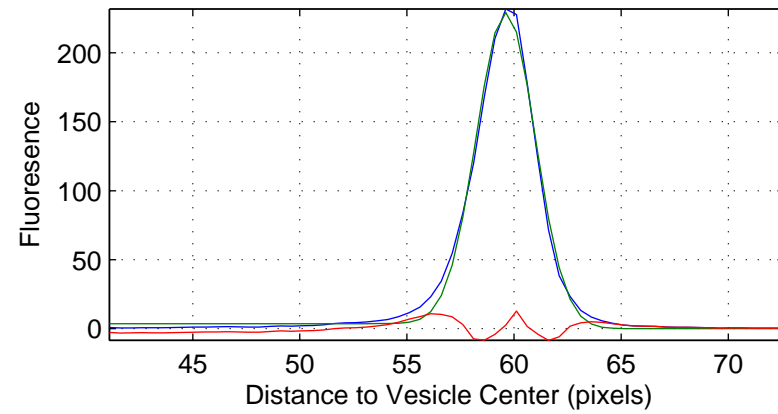

Ch:1 0330-vbb85-td248-0058.tif

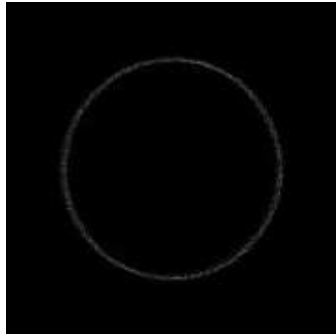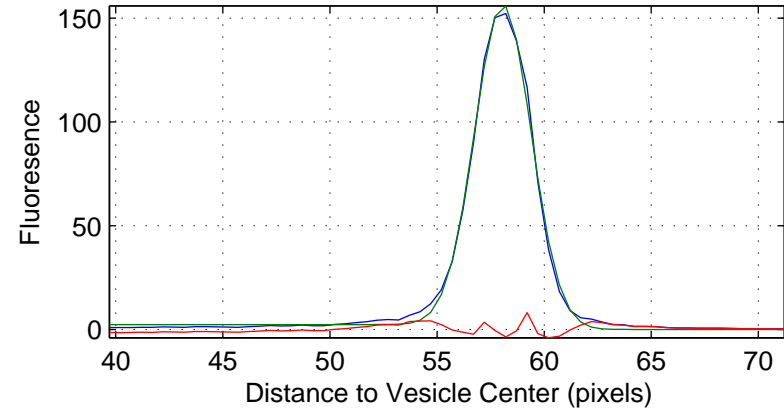

Ch:2 0330-vbb85-td248-0058.tif

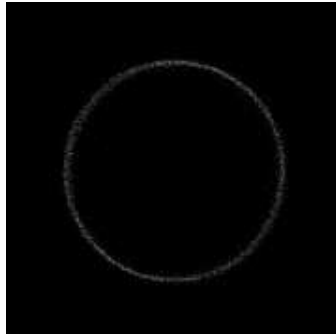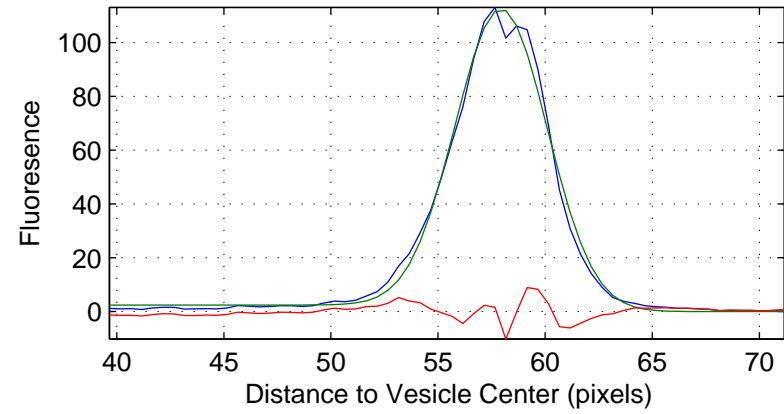

Ch:3 0330-vbb85-td248-0058.tif

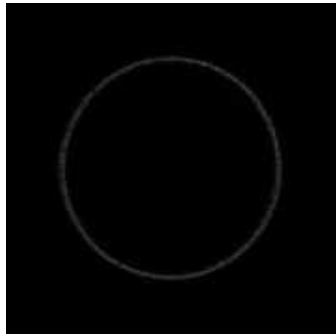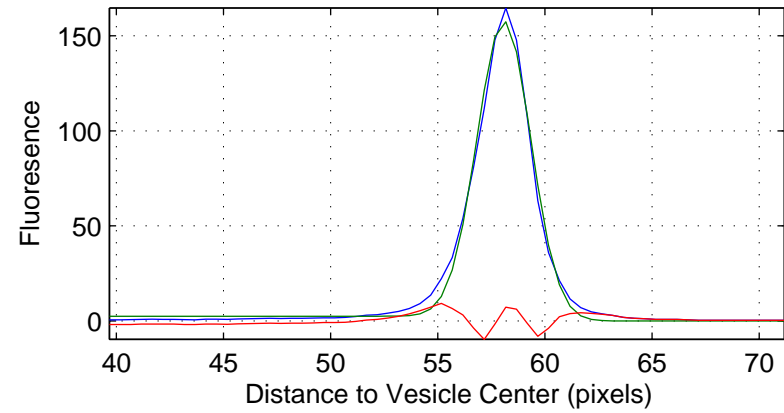

Ch:1 0330-vbb85-td248-0064.tif

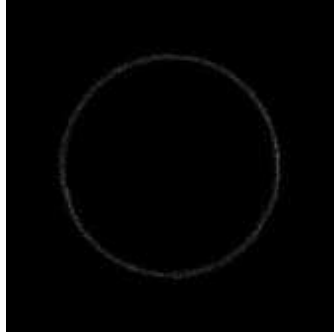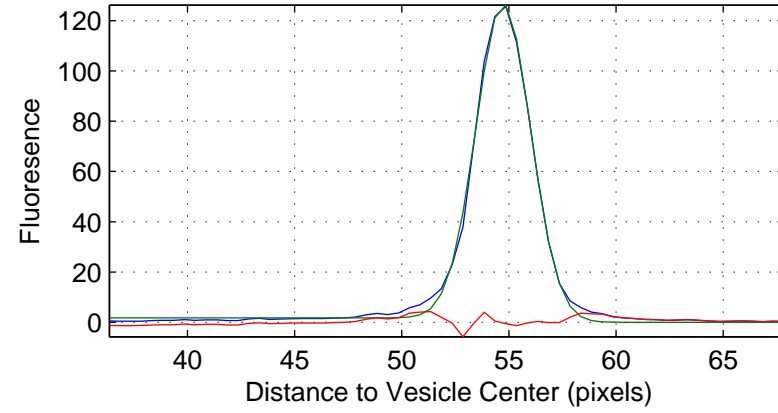

Ch:2 0330-vbb85-td248-0064.tif

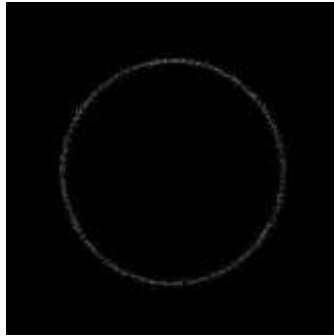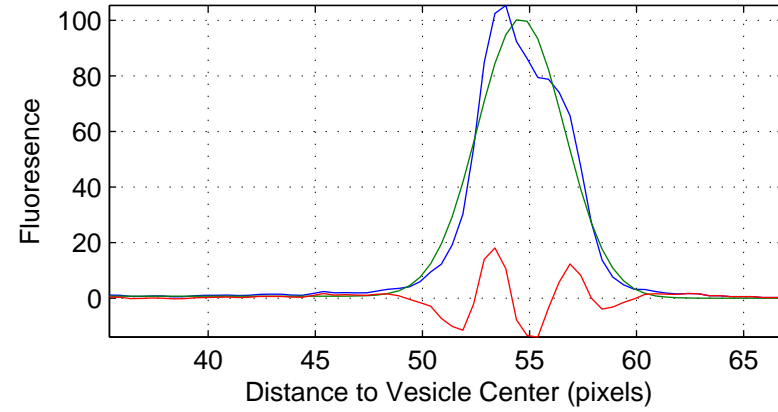

Ch:3 0330-vbb85-td248-0064.tif

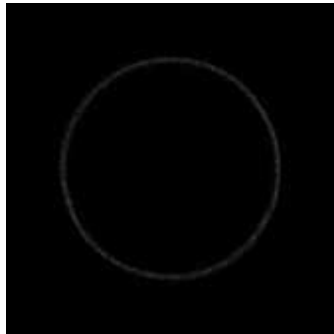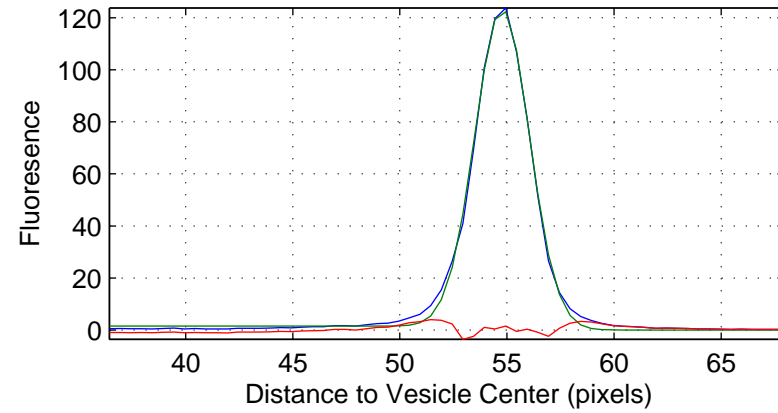

Ch:1 0330-vbb85-td248-0067.tif

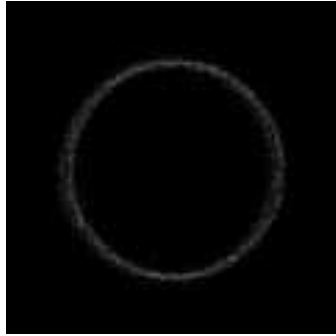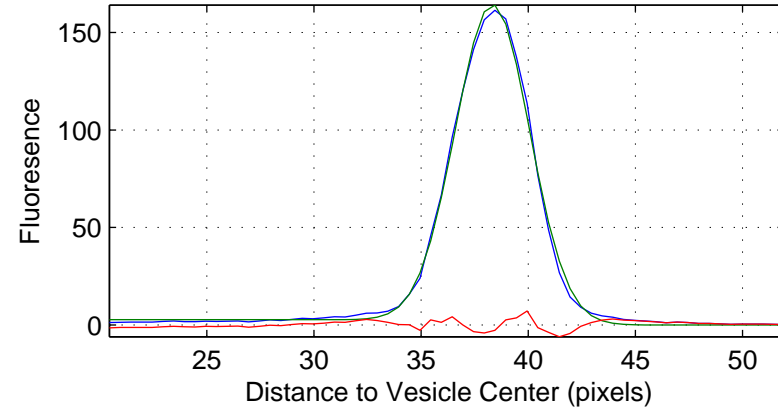

Ch:2 0330-vbb85-td248-0067.tif

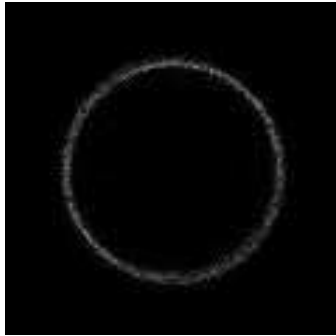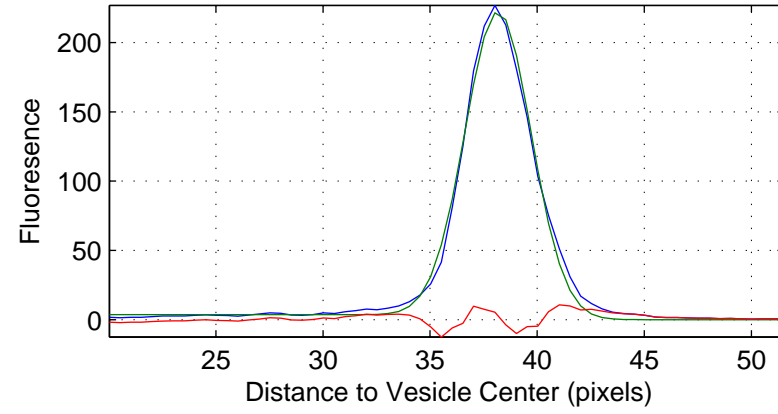

Ch:3 0330-vbb85-td248-0067.tif

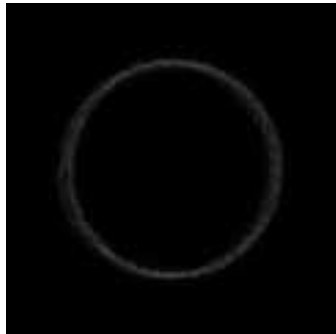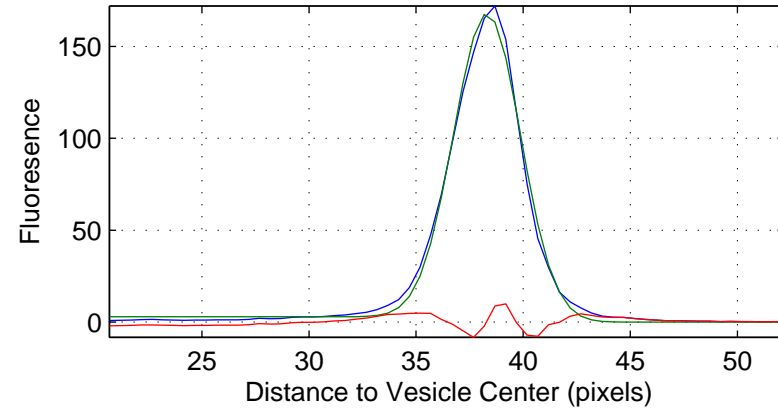

Ch:1 0330-vbb85-td248-0068.tif

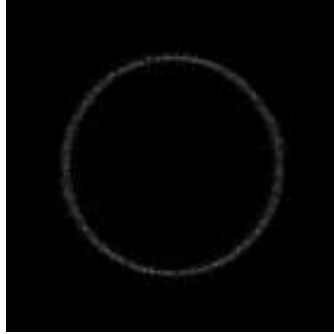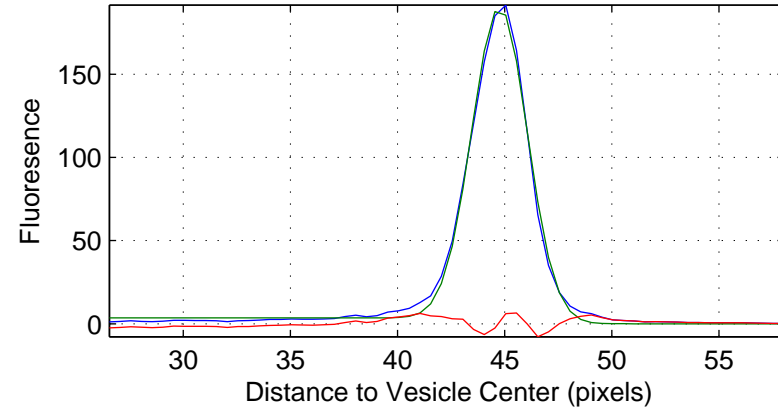

Ch:2 0330-vbb85-td248-0068.tif

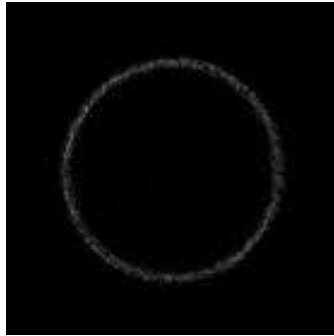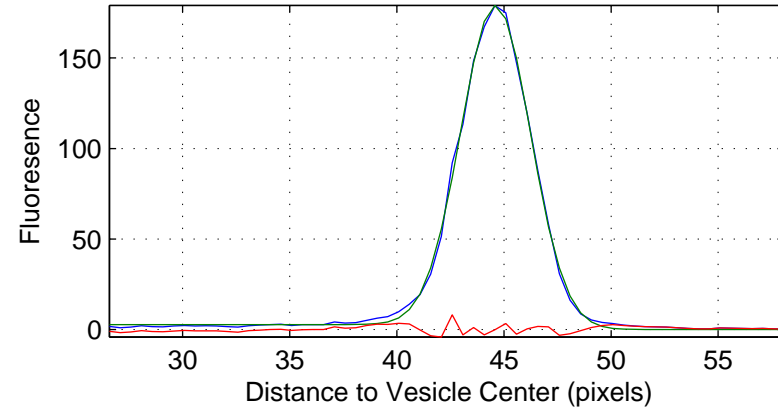

Ch:3 0330-vbb85-td248-0068.tif

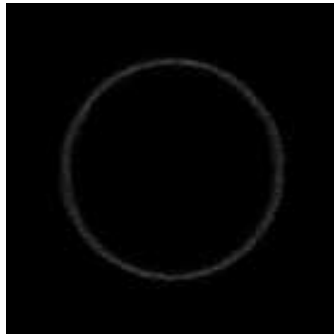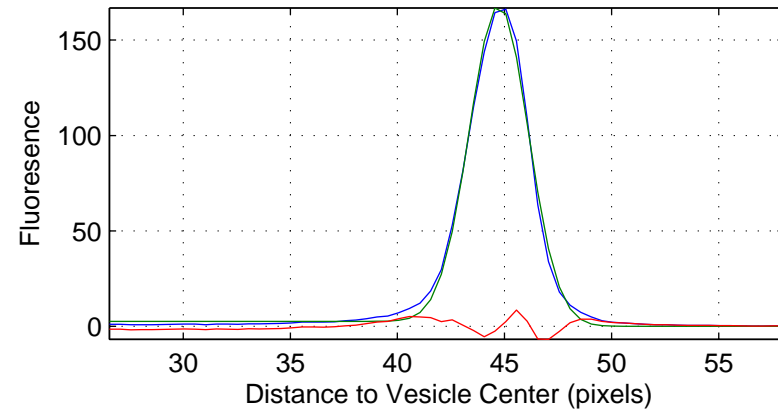

Ch:1 0331-vbb83-248-0009.tif

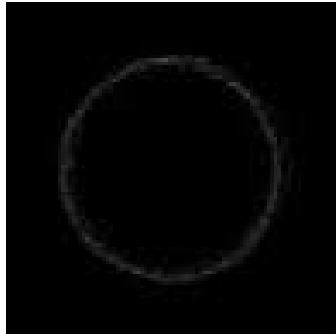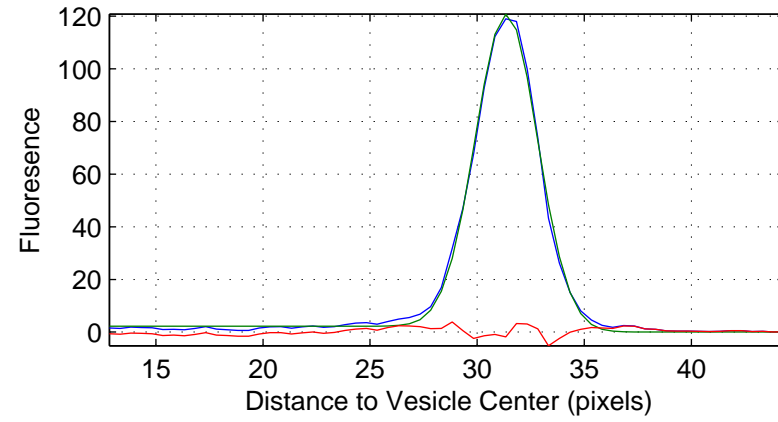

Ch:2 0331-vbb83-248-0009.tif

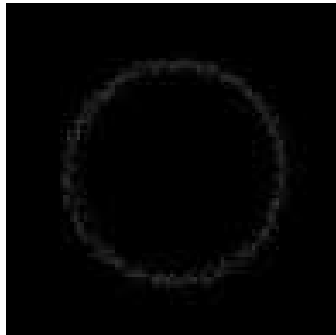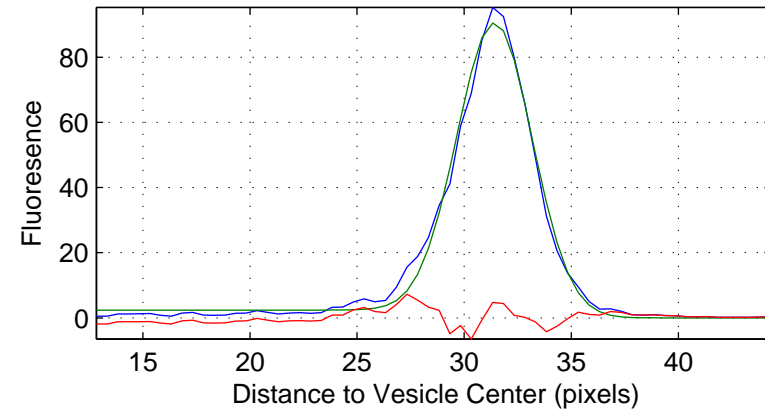

Ch:3 0331-vbb83-248-0009.tif

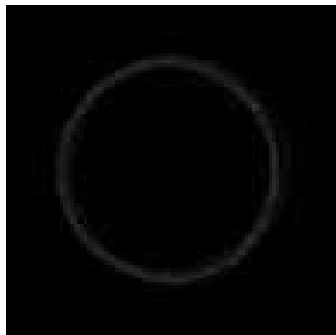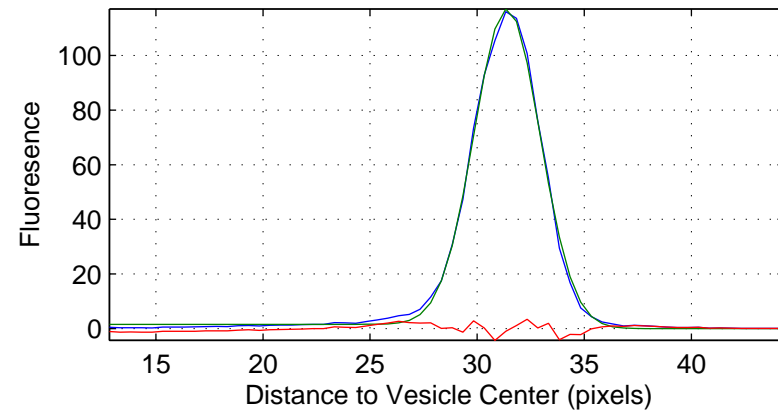

Ch:1 0331-vbb83-248-0010.tif

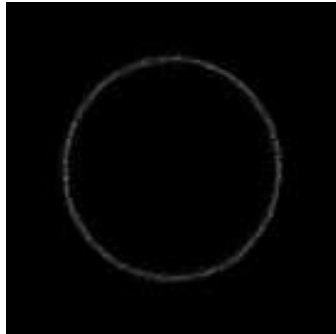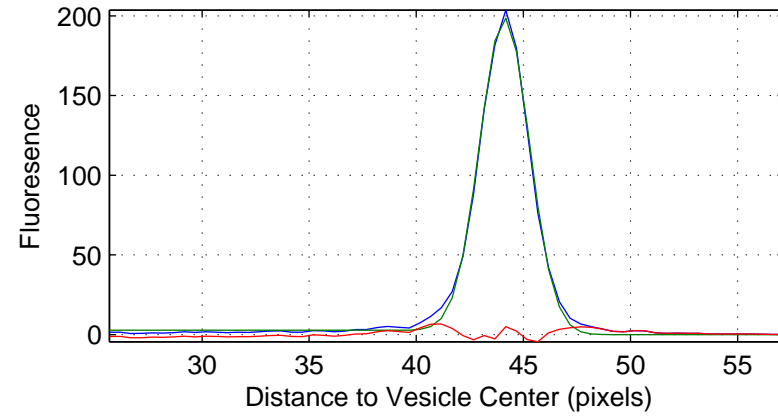

Ch:2 0331-vbb83-248-0010.tif

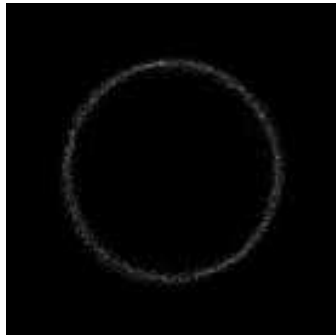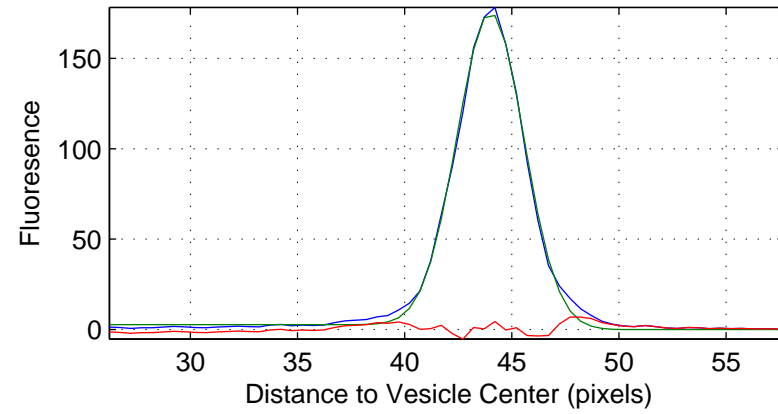

Ch:3 0331-vbb83-248-0010.tif

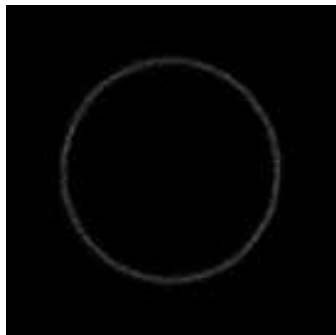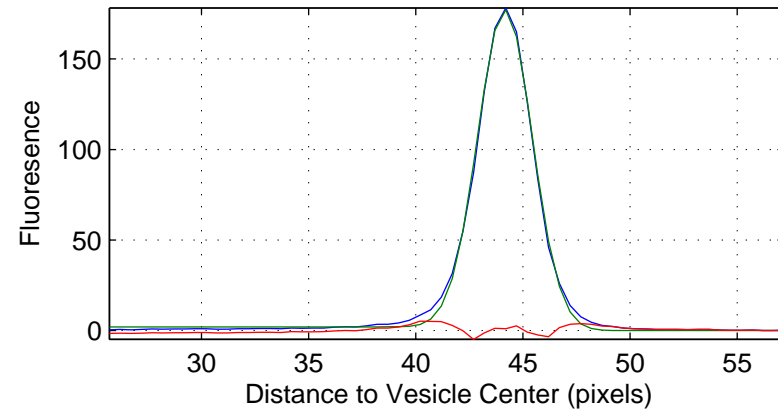



Ch:1 0331-vbb83-248-0012.tif

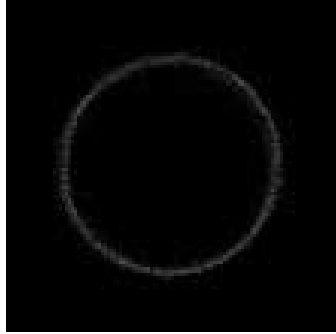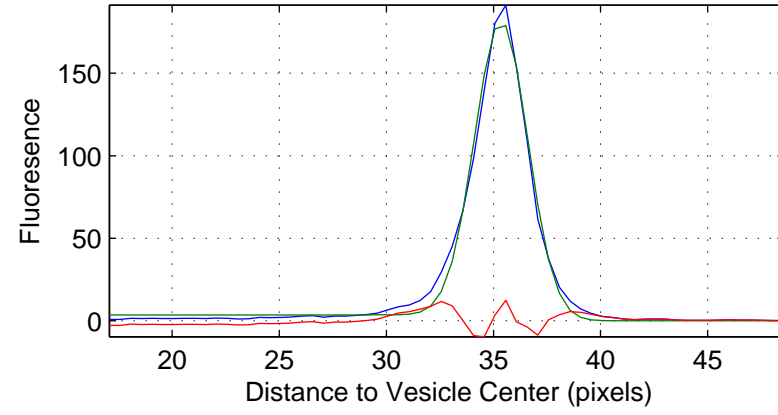

Ch:2 0331-vbb83-248-0012.tif

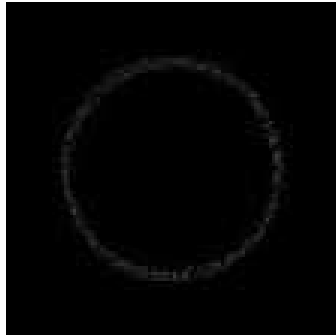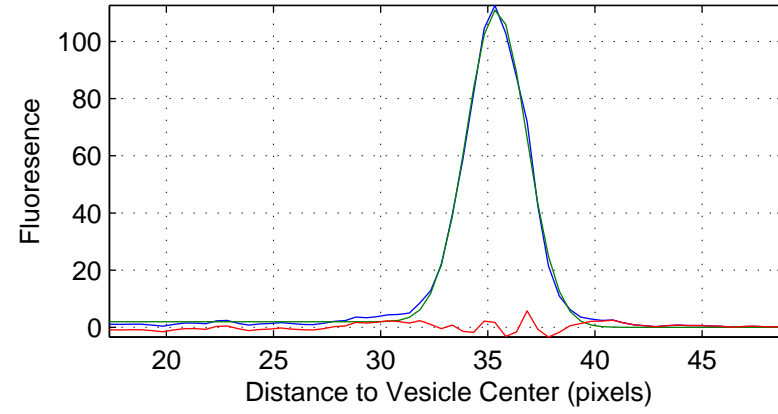

Ch:3 0331-vbb83-248-0012.tif

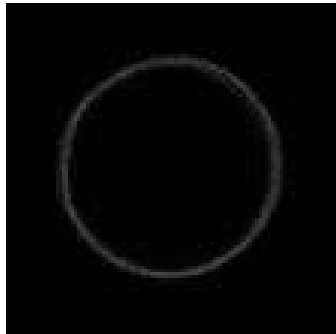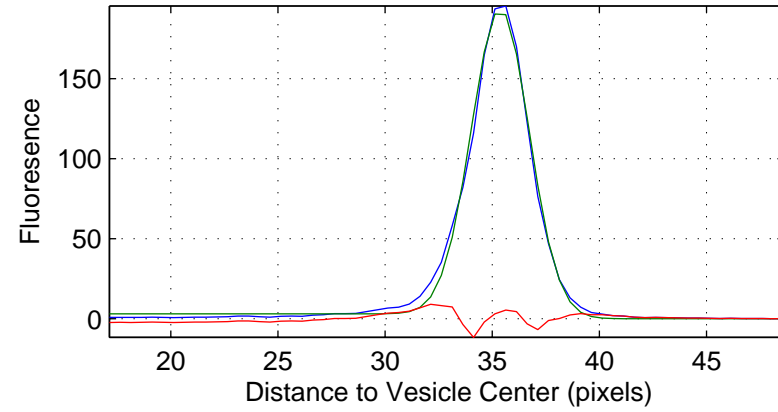

Ch:1 0331-vbb83-248-0021.tif

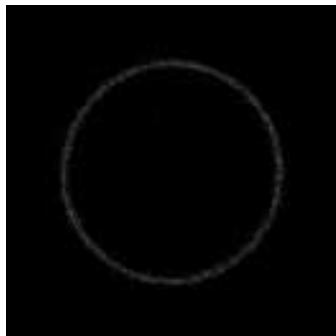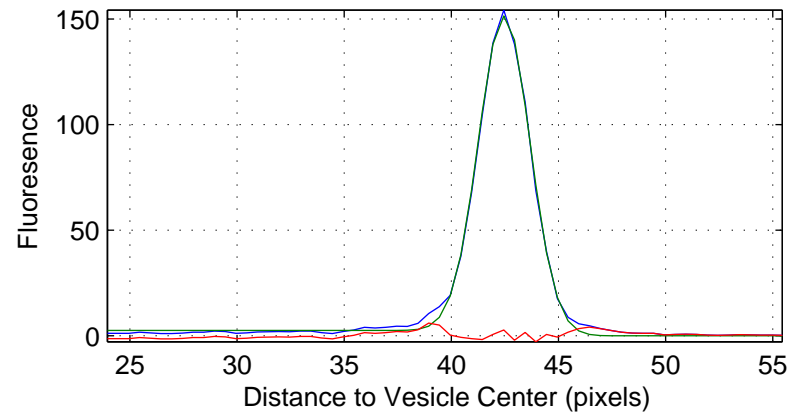

Ch:2 0331-vbb83-248-0021.tif

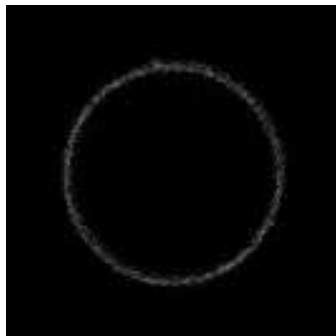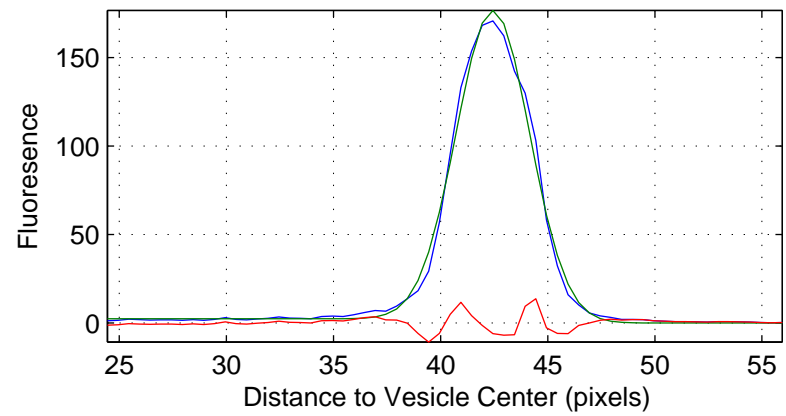

Ch:3 0331-vbb83-248-0021.tif

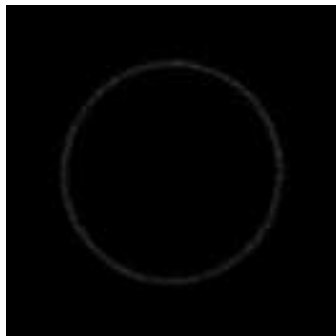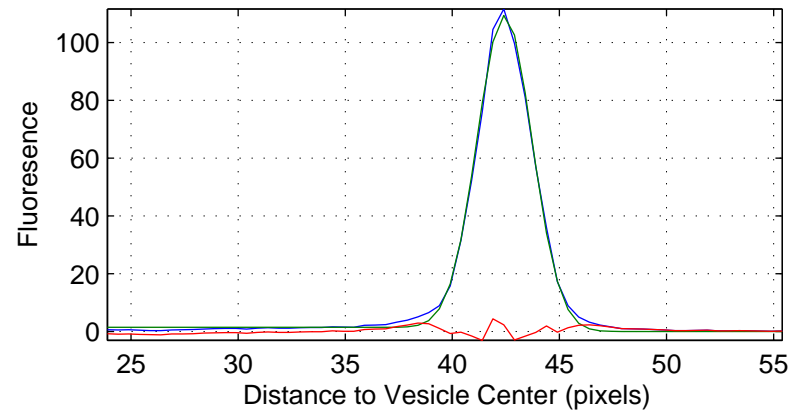

Ch:1 0331-vbb83-248-0023.tif

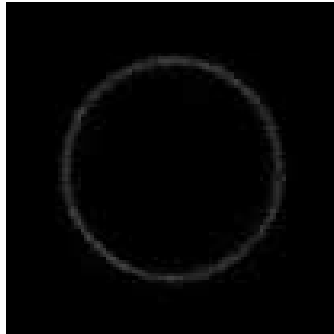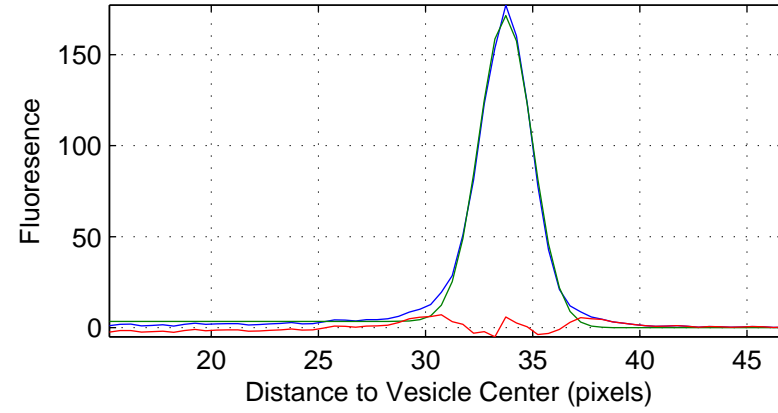

Ch:2 0331-vbb83-248-0023.tif

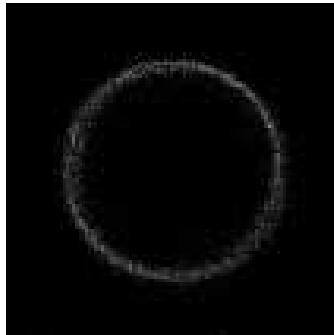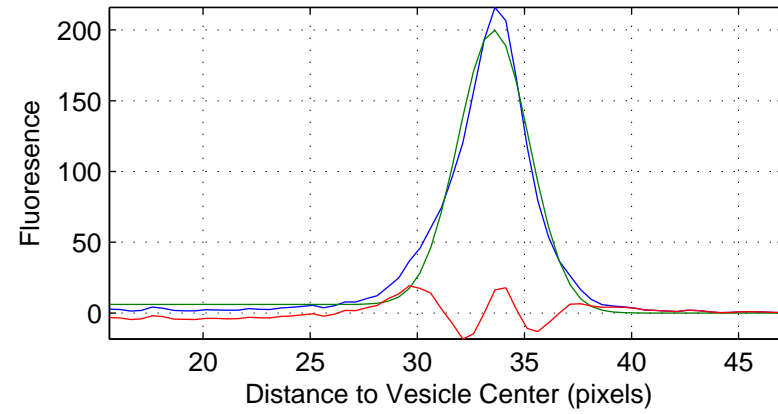

Ch:3 0331-vbb83-248-0023.tif

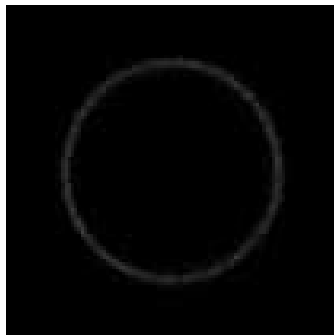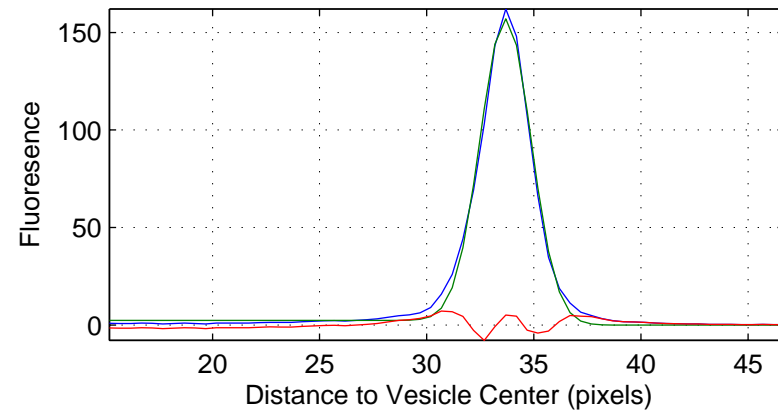

Ch:1 0331-vbb83-248-0025.tif

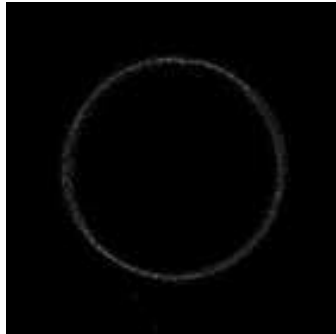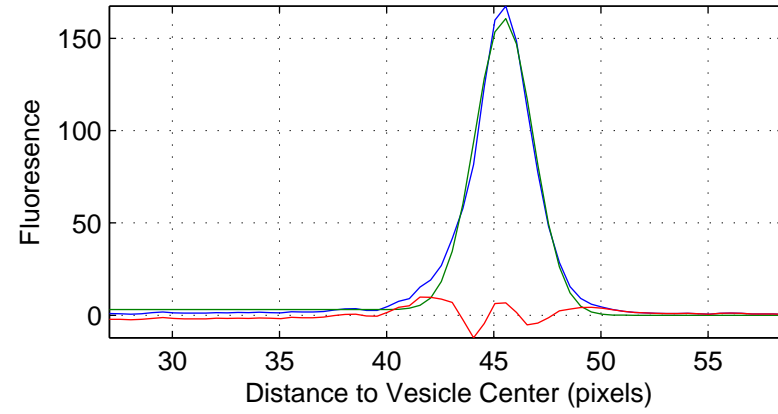

Ch:2 0331-vbb83-248-0025.tif

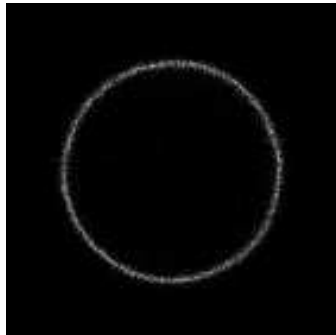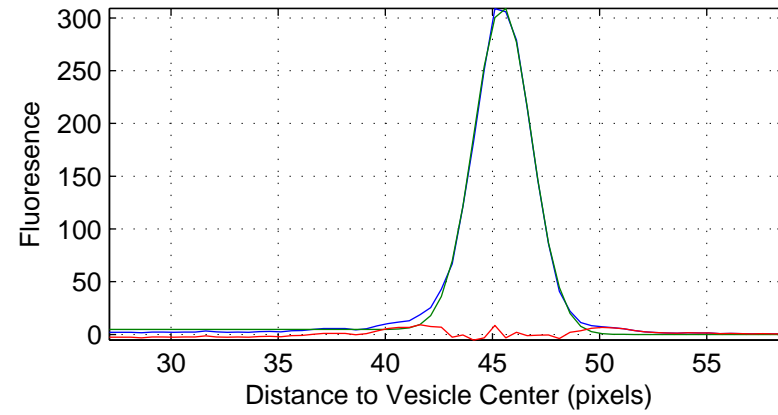

Ch:3 0331-vbb83-248-0025.tif

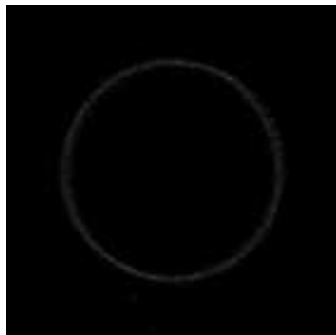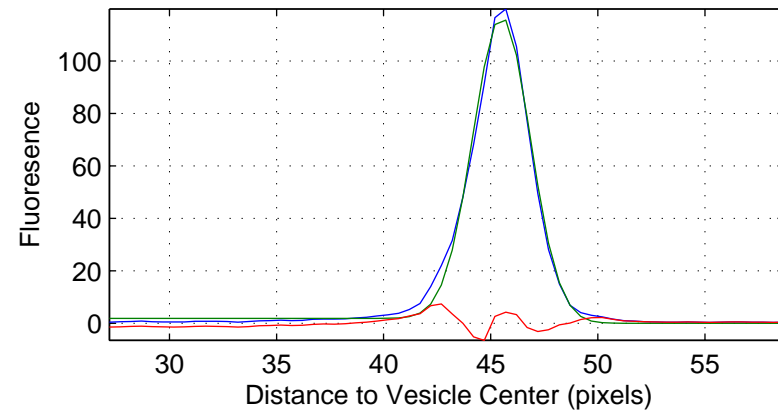

Ch:1 0331-vbb83-248-0026.tif

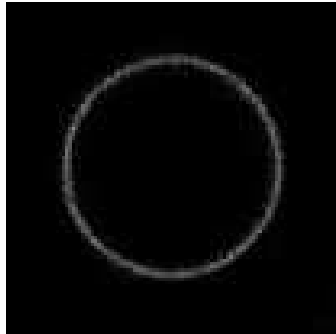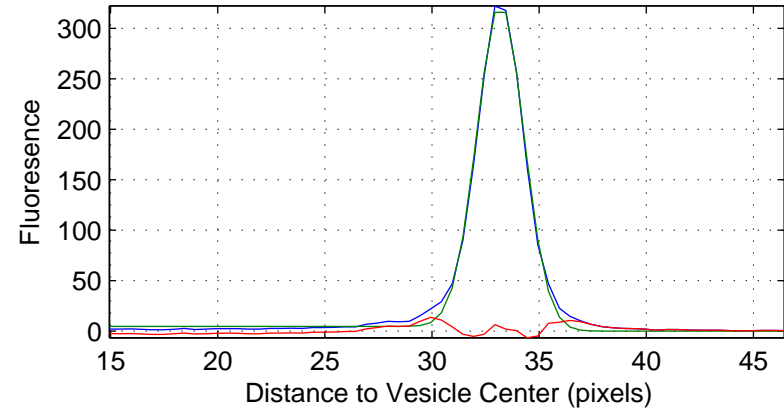

Ch:2 0331-vbb83-248-0026.tif

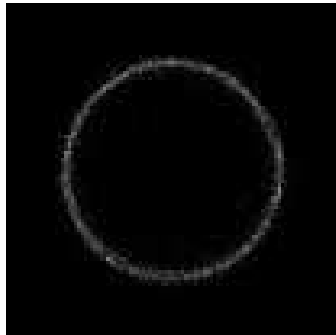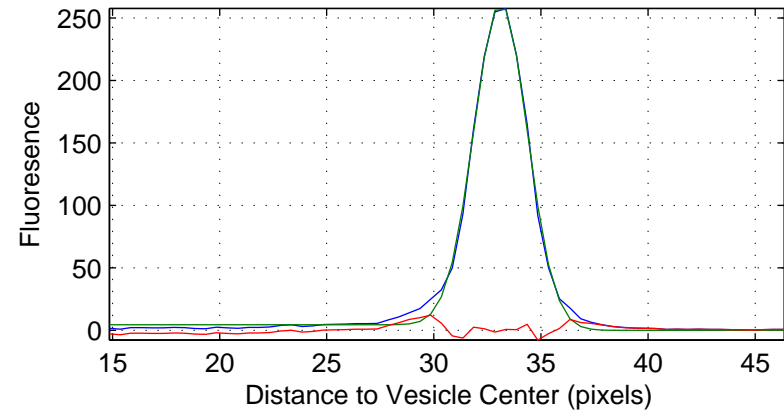

Ch:3 0331-vbb83-248-0026.tif

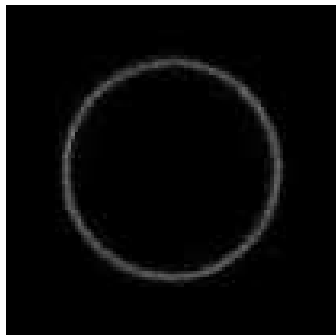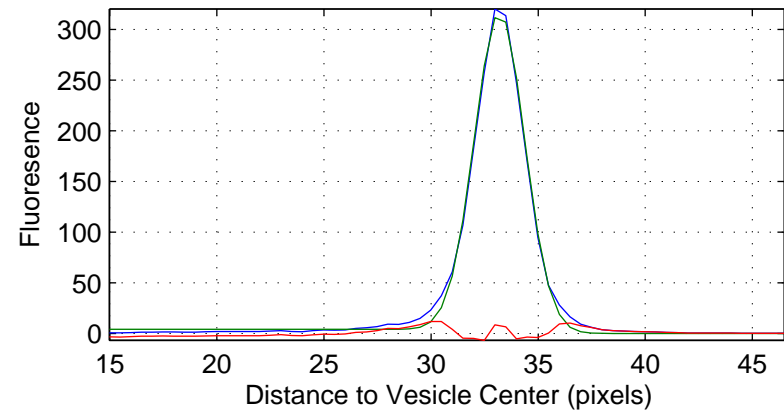

Ch:1 0331-vbb83-248-0032.tif

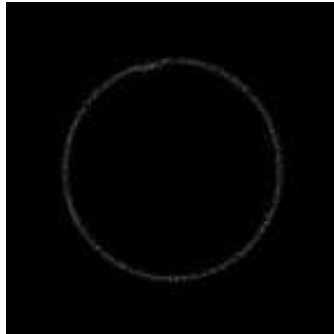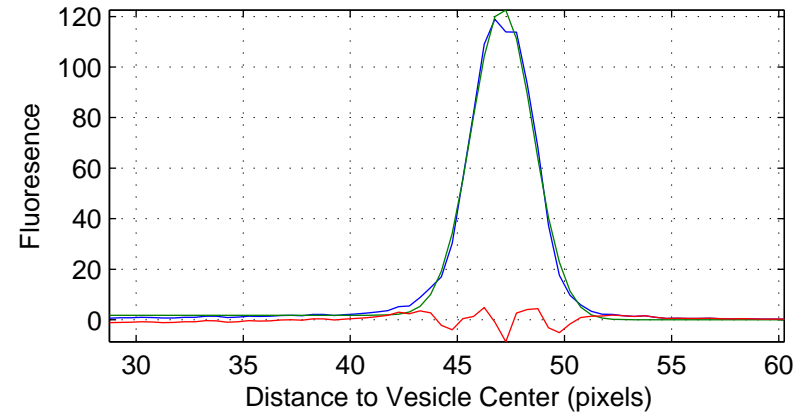

Ch:2 0331-vbb83-248-0032.tif

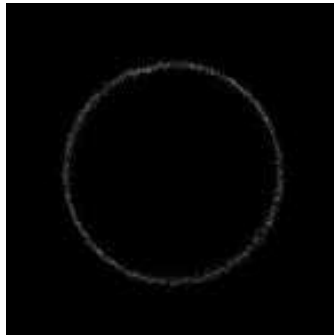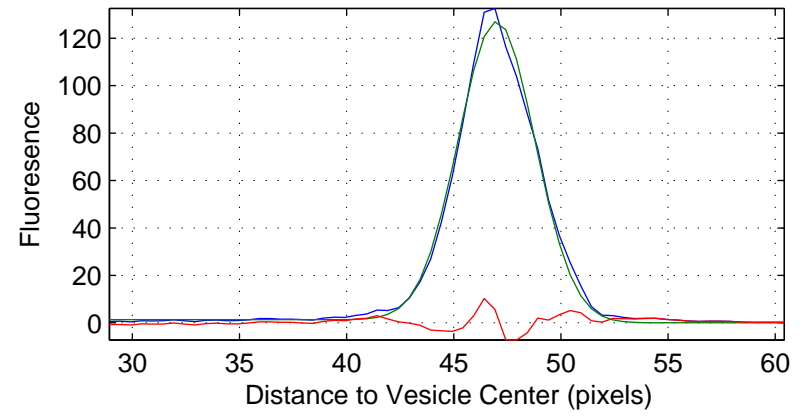

Ch:3 0331-vbb83-248-0032.tif

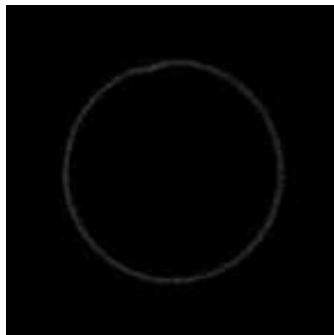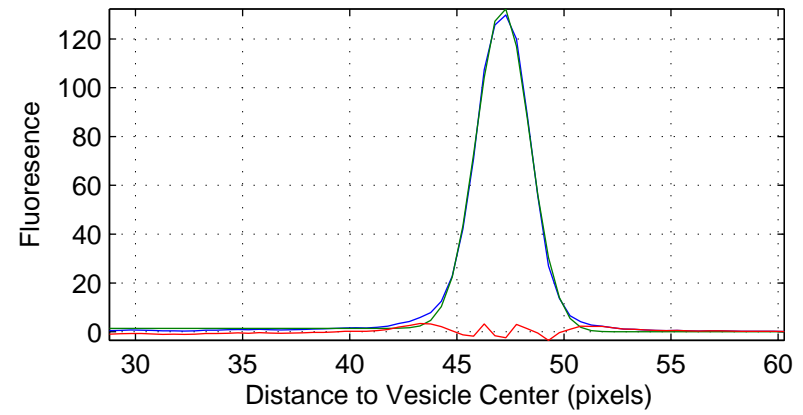

Ch:1 0331-vbb83-248-0039.tif

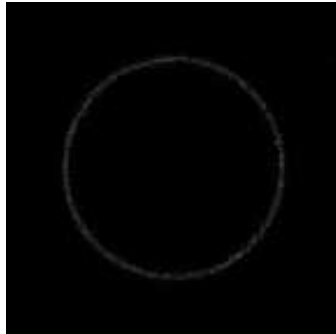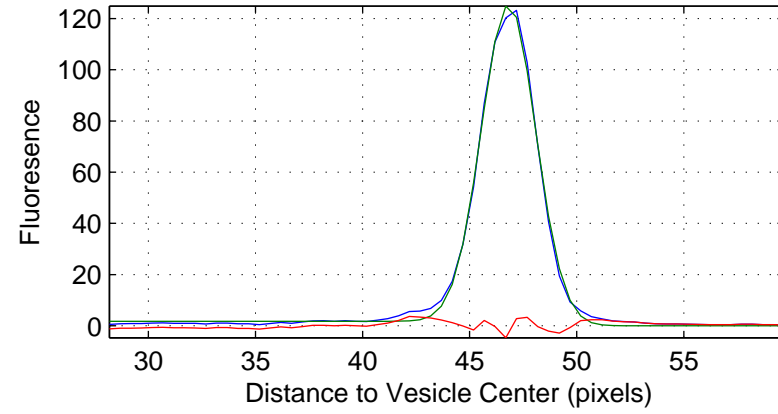

Ch:2 0331-vbb83-248-0039.tif

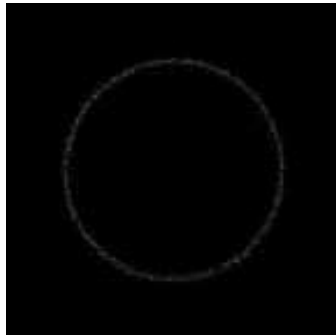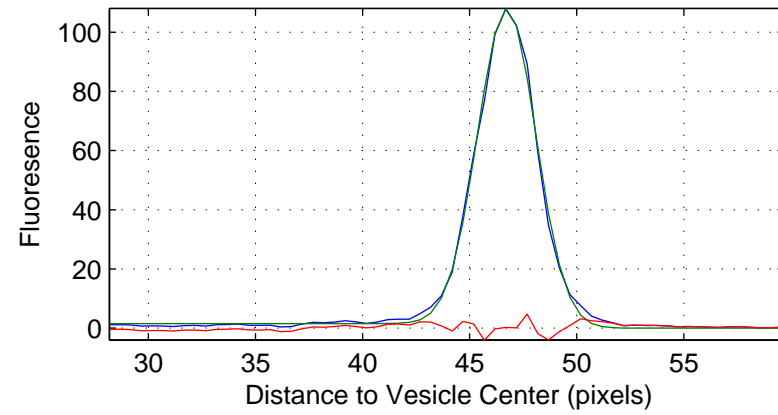

Ch:3 0331-vbb83-248-0039.tif

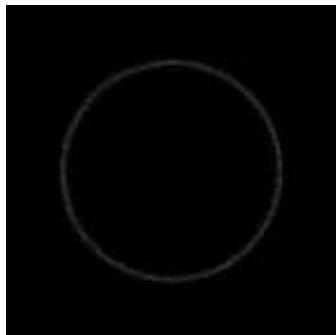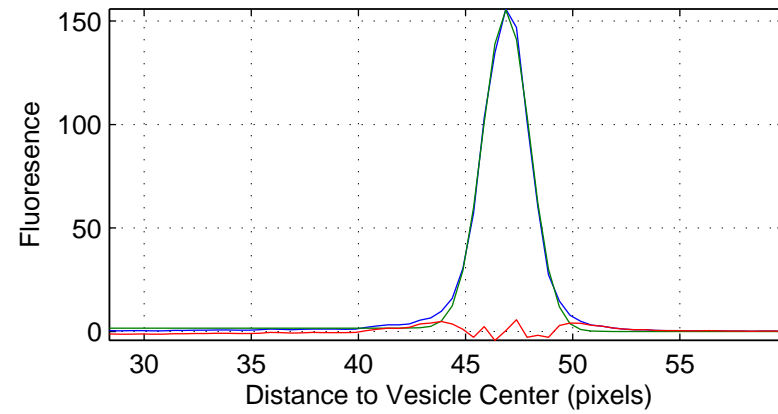

Ch:1 0331-vbb83-248-0040.tif

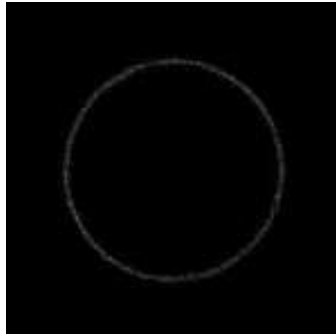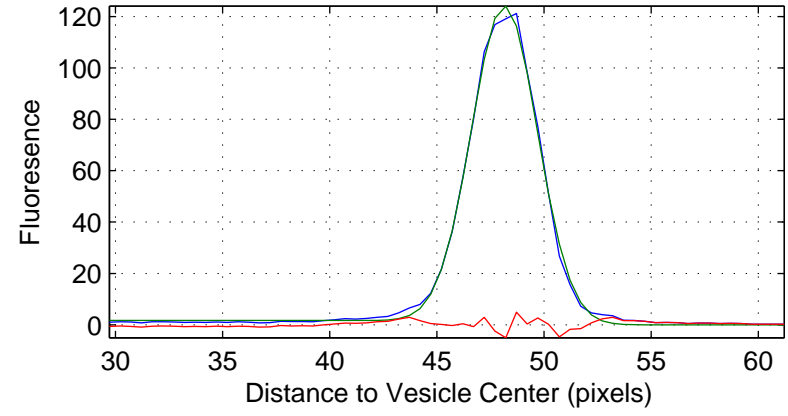

Ch:2 0331-vbb83-248-0040.tif

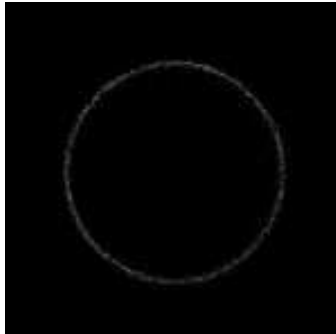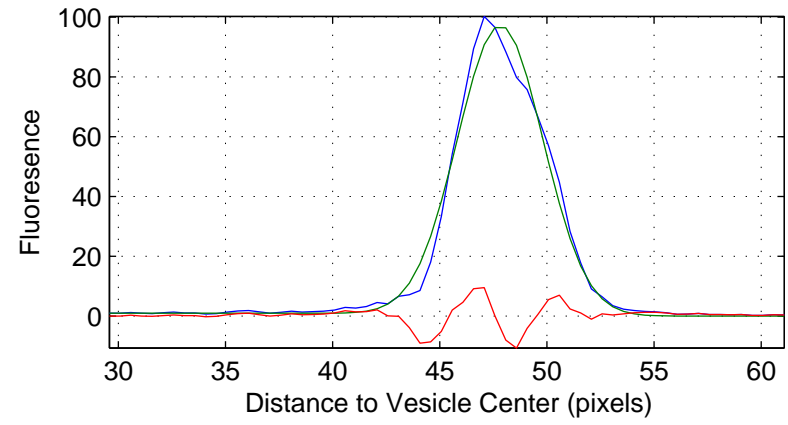

Ch:3 0331-vbb83-248-0040.tif

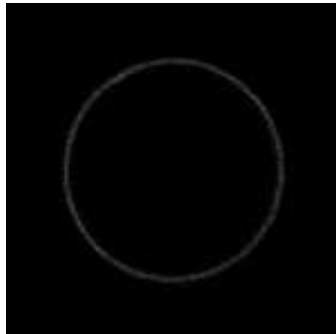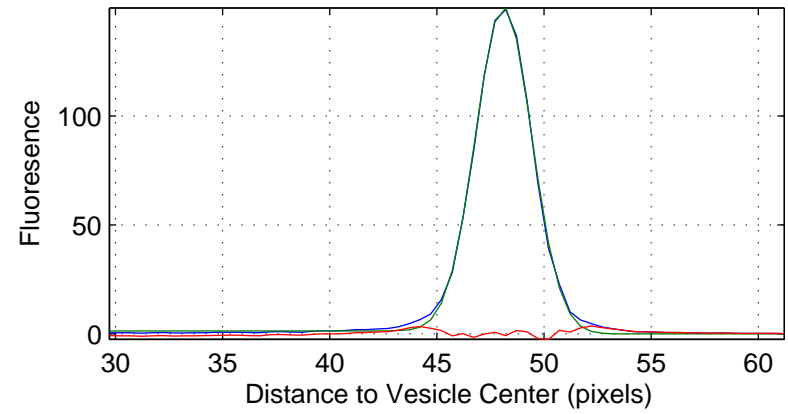



Ch:1 0331-vbb83-248-0046.tif

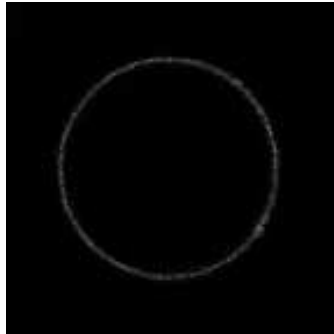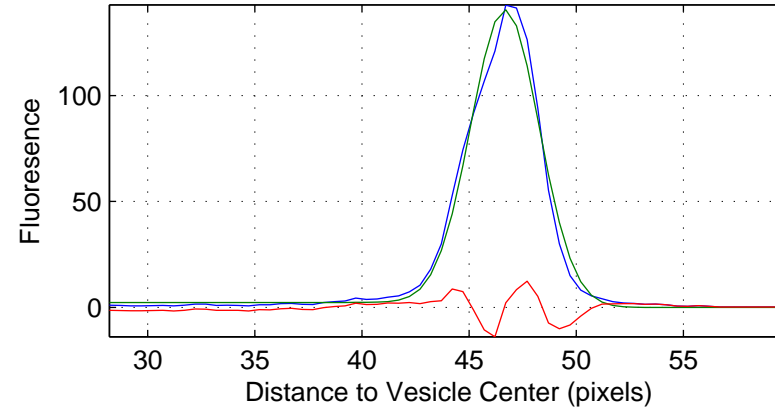

Ch:2 0331-vbb83-248-0046.tif

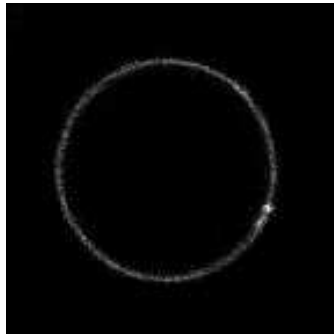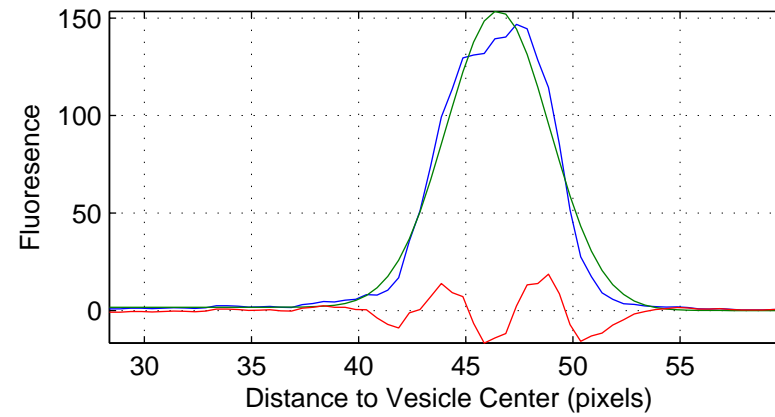

Ch:3 0331-vbb83-248-0046.tif

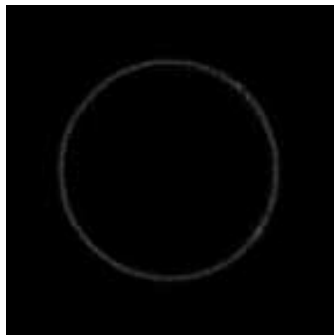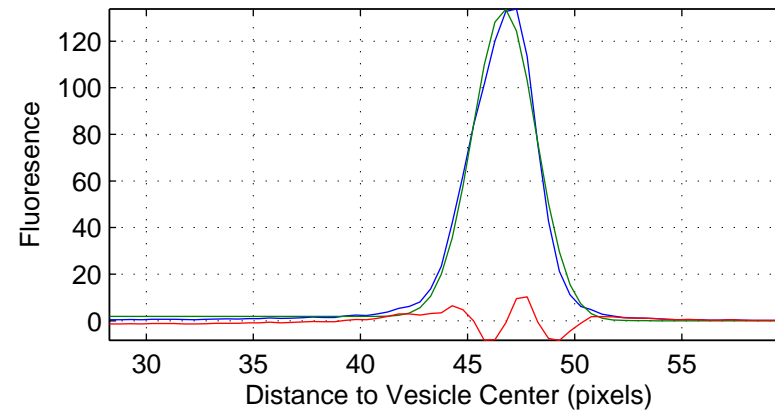

Ch:1 0331-vbb83-248-0048.tif

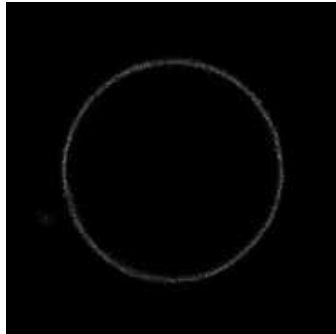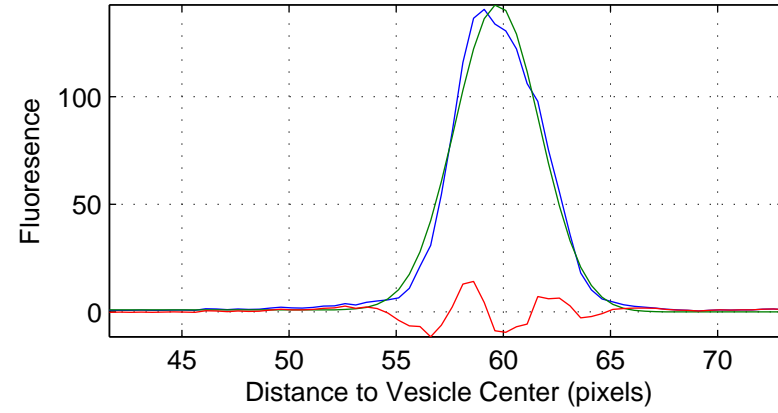

Ch:2 0331-vbb83-248-0048.tif

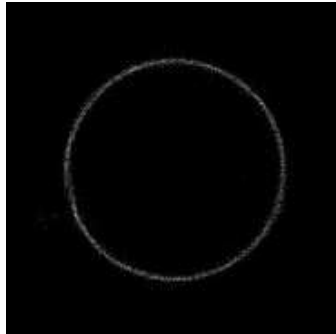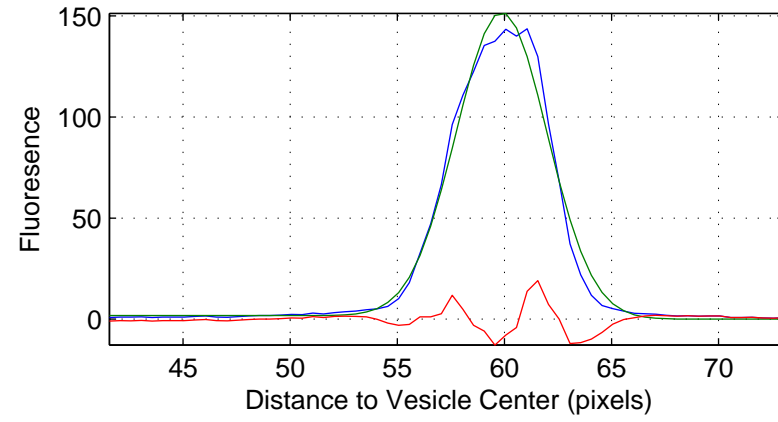

Ch:3 0331-vbb83-248-0048.tif

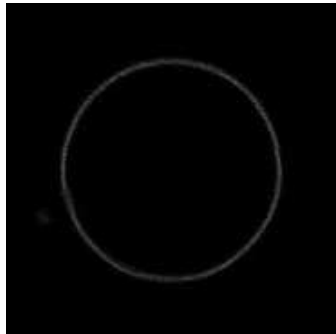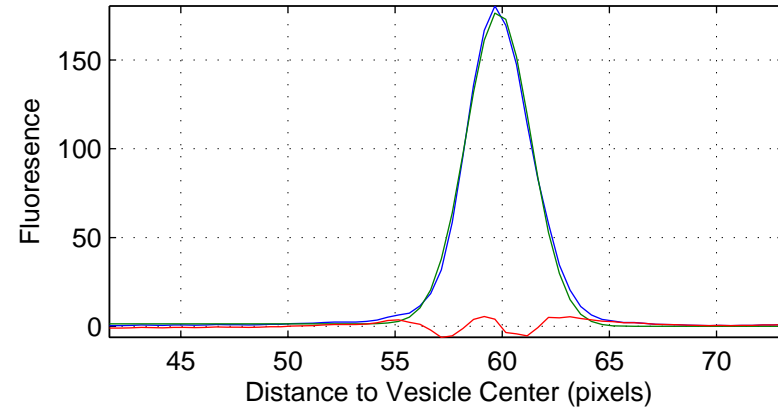

Ch:1 0331-vbb83-248-0049.tif

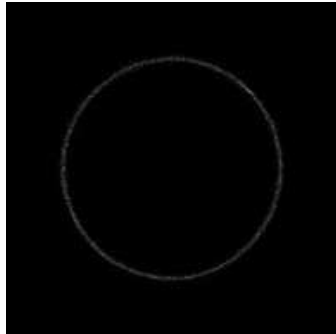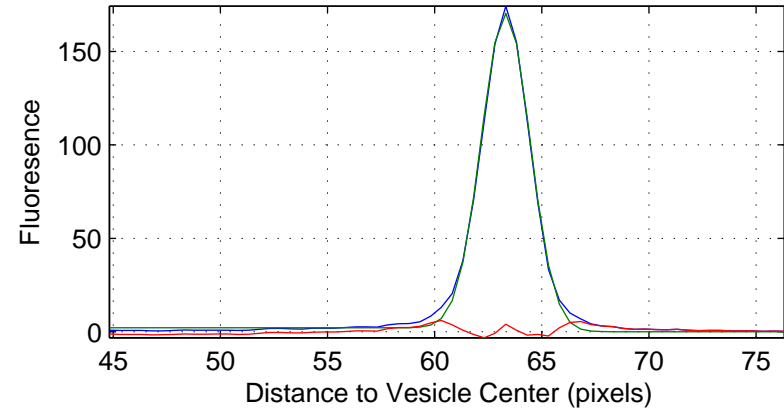

Ch:2 0331-vbb83-248-0049.tif

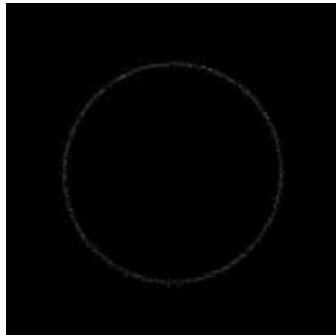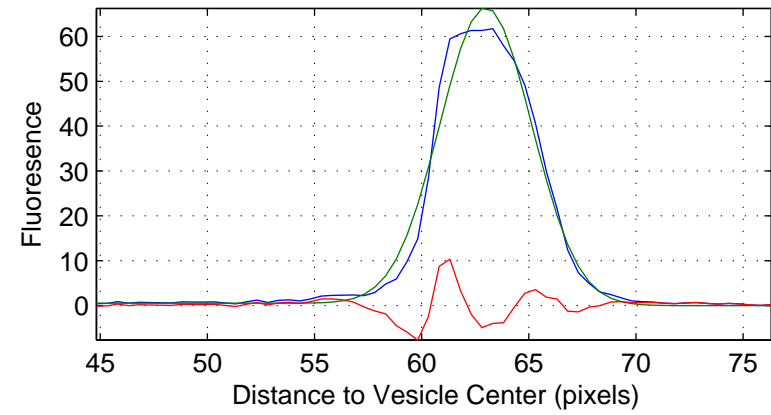

Ch:3 0331-vbb83-248-0049.tif

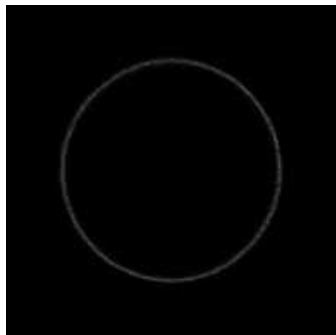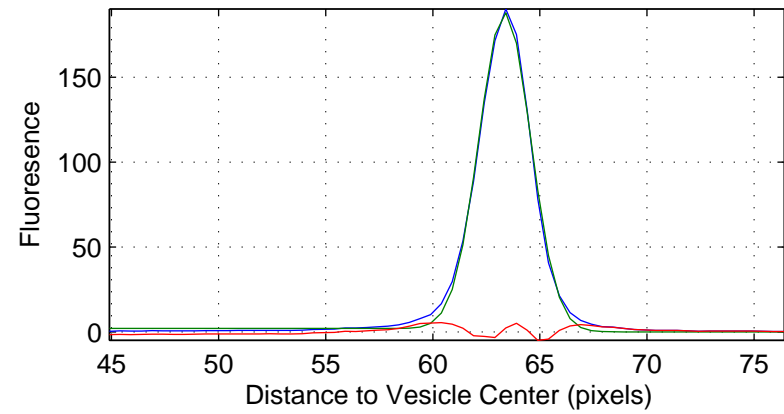

Ch:1 0331-vbb83-248-0054.tif

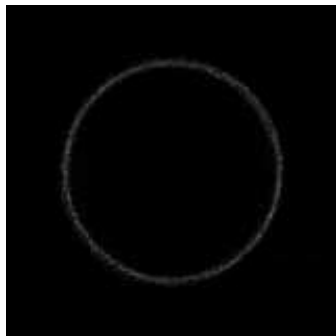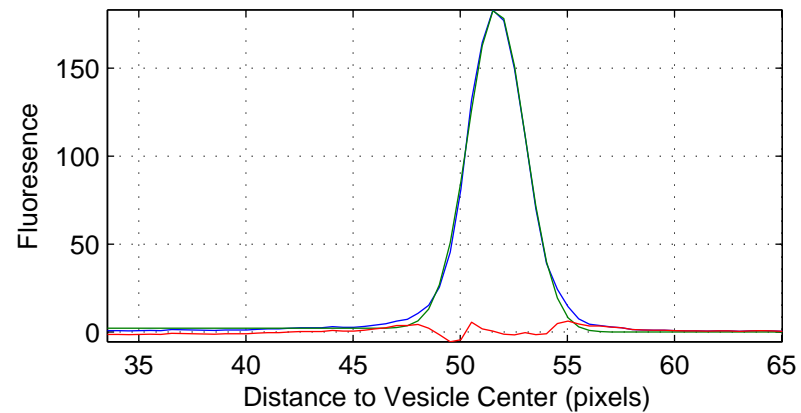

Ch:2 0331-vbb83-248-0054.tif

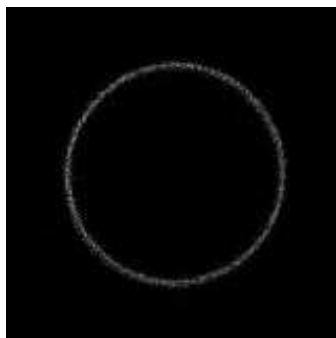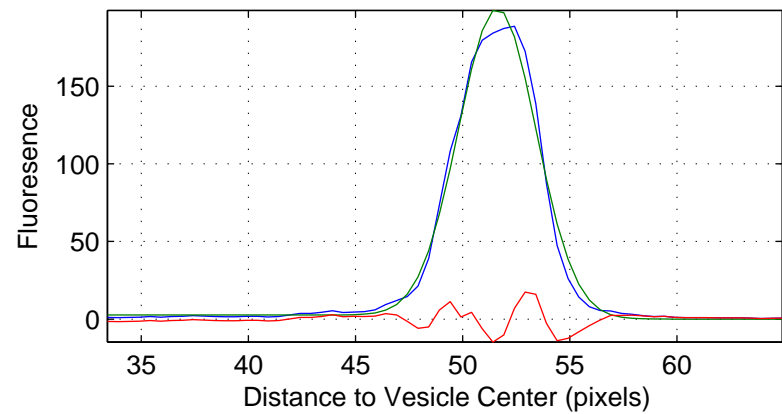

Ch:3 0331-vbb83-248-0054.tif

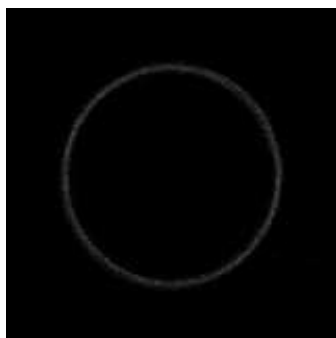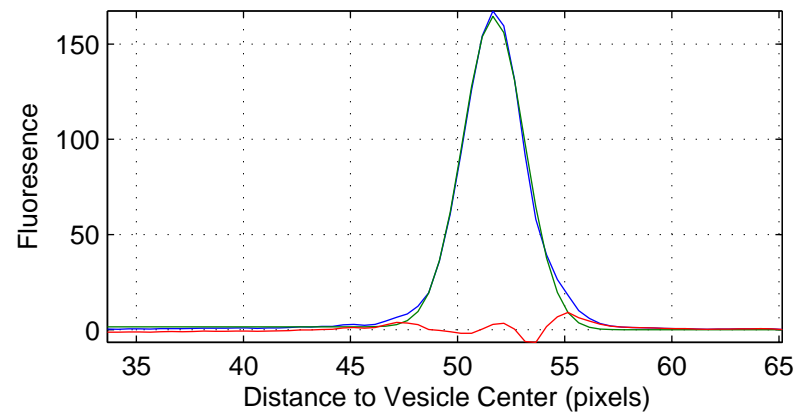

Ch:1 0331-vbb83-248-0055.tif

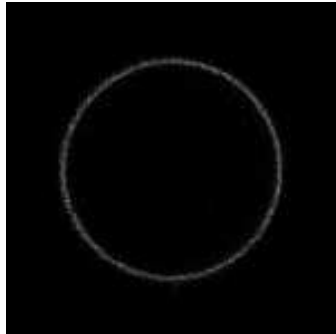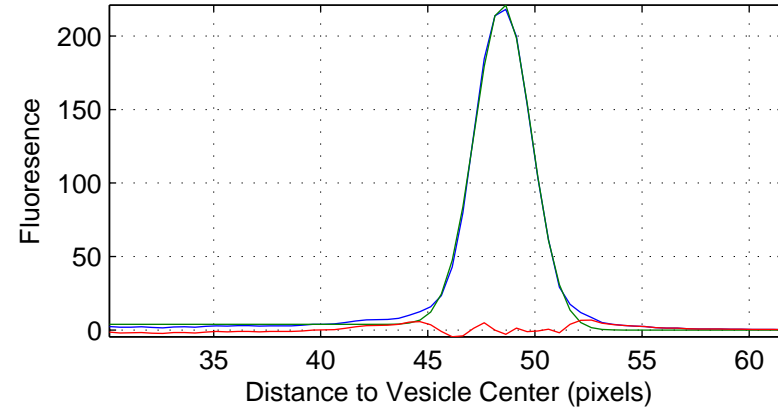

Ch:2 0331-vbb83-248-0055.tif

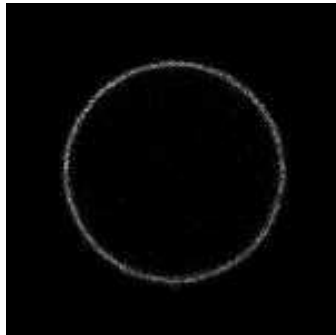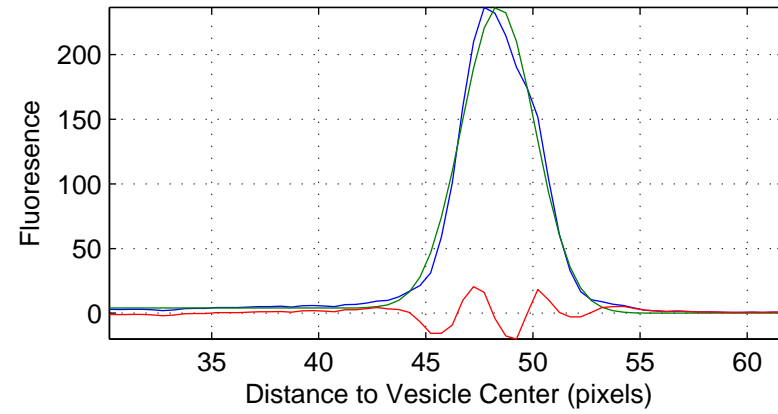

Ch:3 0331-vbb83-248-0055.tif

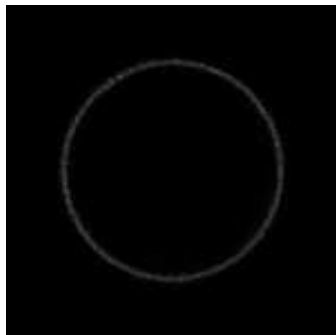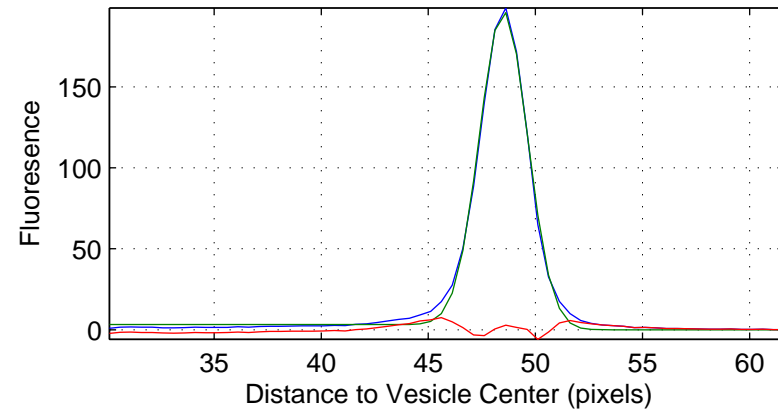

Ch:1 0331-vbb83-248-0056.tif

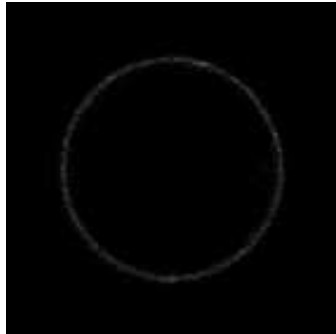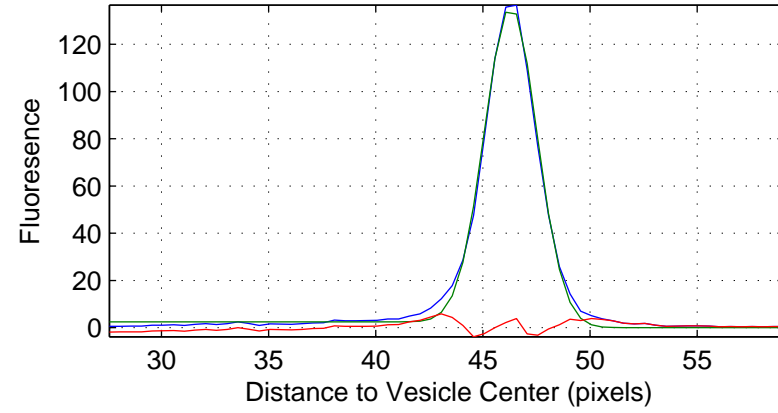

Ch:2 0331-vbb83-248-0056.tif

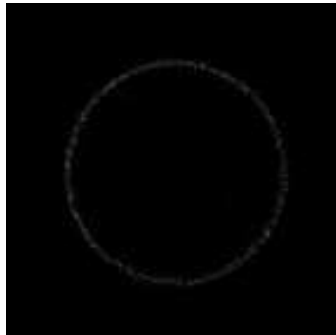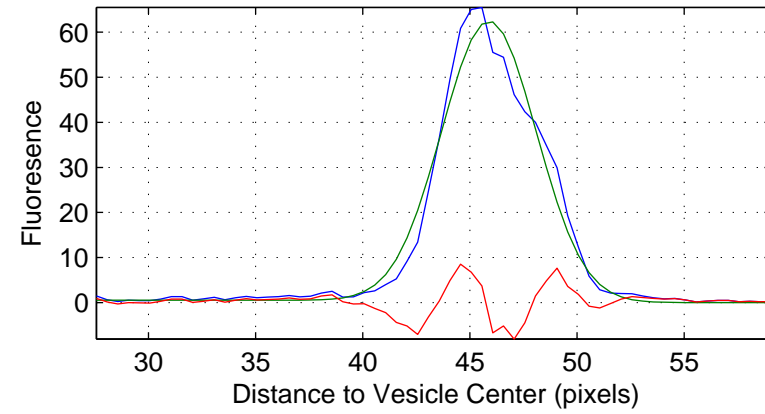

Ch:3 0331-vbb83-248-0056.tif

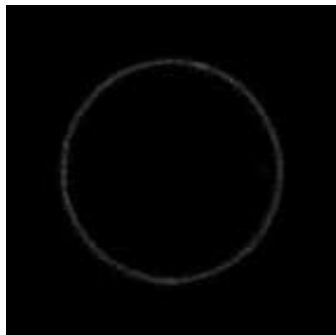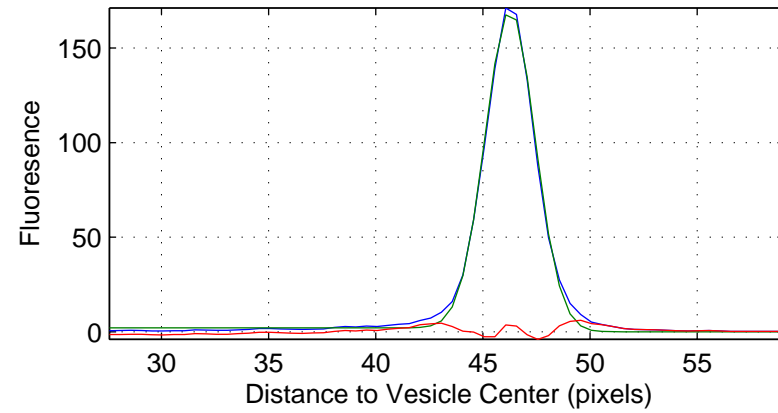

Ch:1 0331-vbb83-248-0057.tif

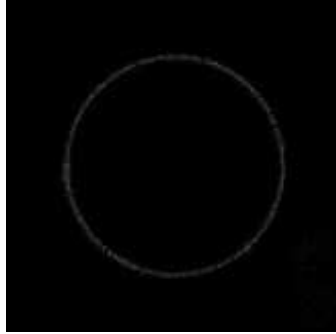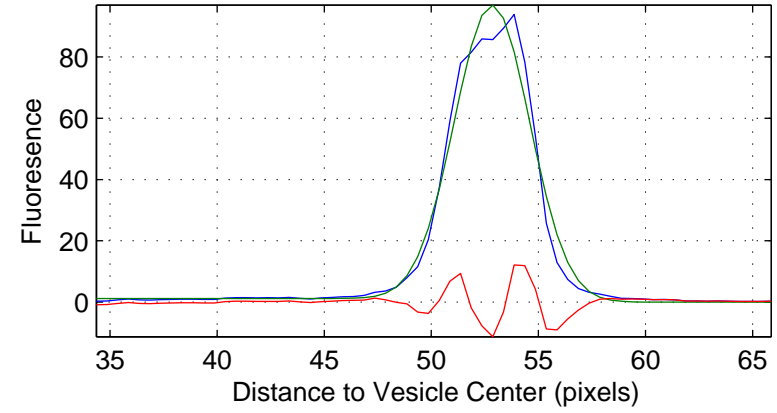

Ch:2 0331-vbb83-248-0057.tif

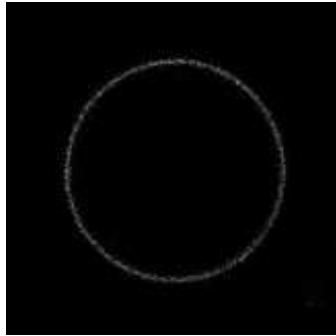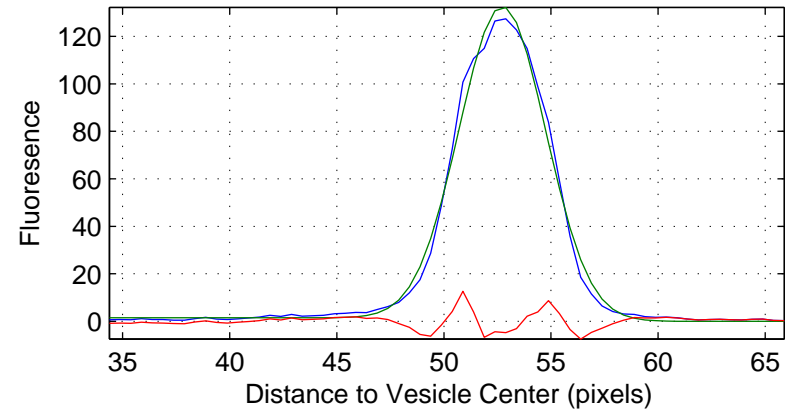

Ch:3 0331-vbb83-248-0057.tif

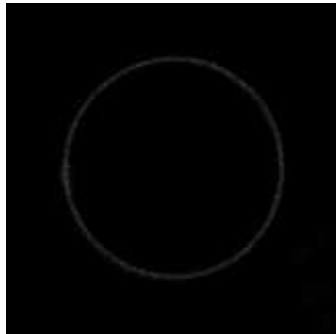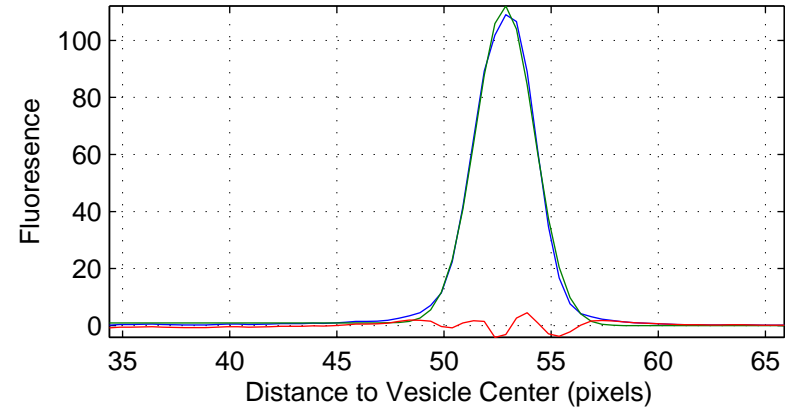

Ch:1 0326-vbb85-td248-0005.tif

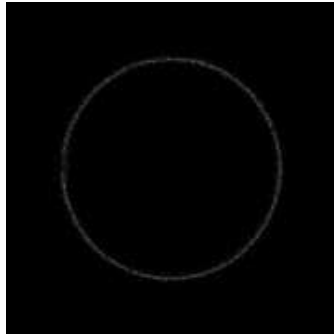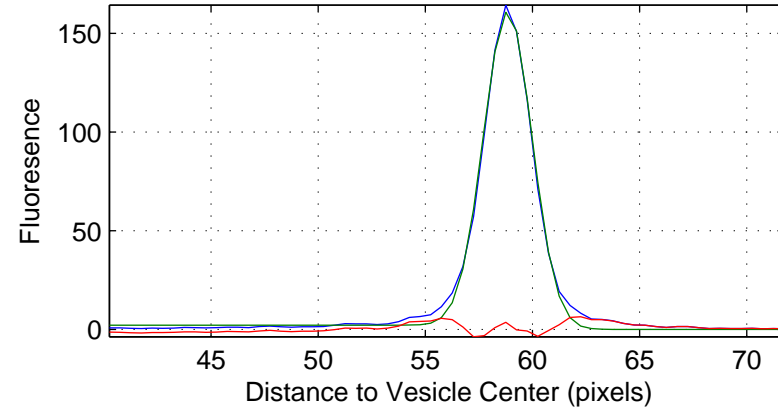

Ch:2 0326-vbb85-td248-0005.tif

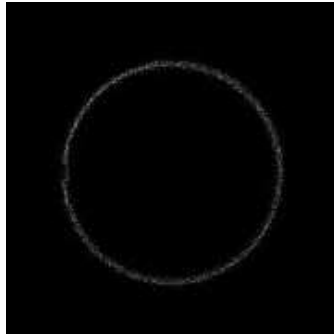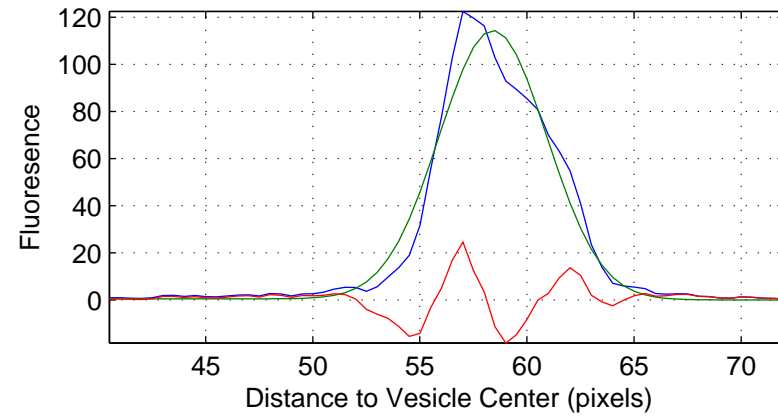

Ch:3 0326-vbb85-td248-0005.tif

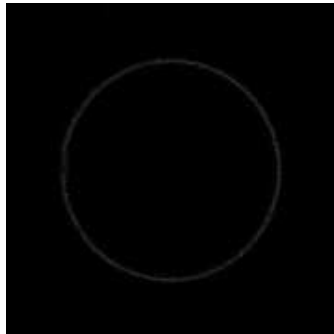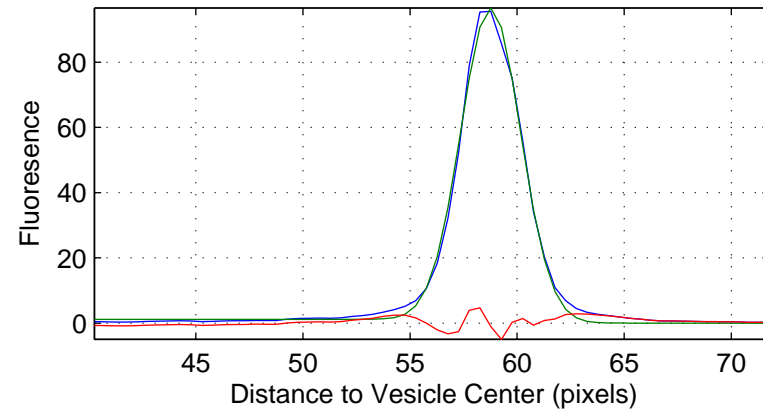



Ch:1 0326-vbb85-td248-0017.tif

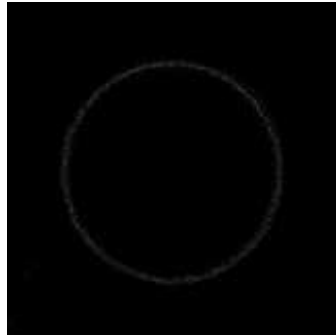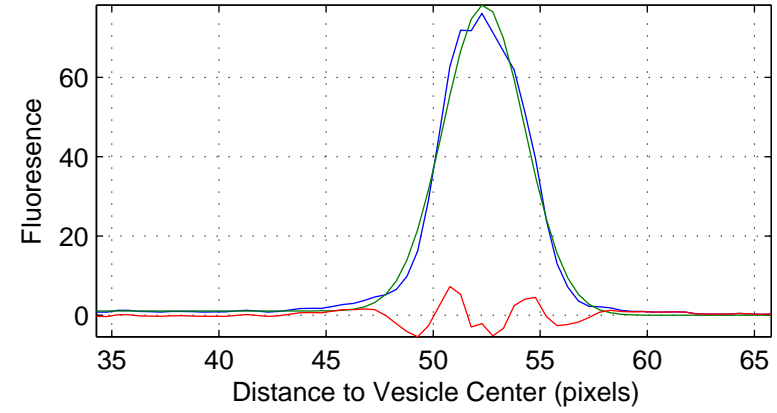

Ch:2 0326-vbb85-td248-0017.tif

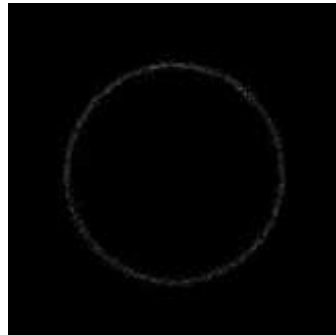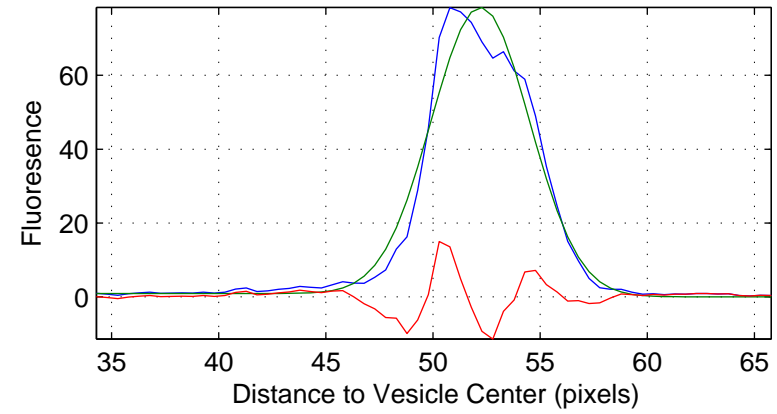

Ch:3 0326-vbb85-td248-0017.tif

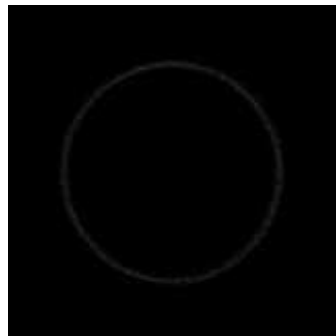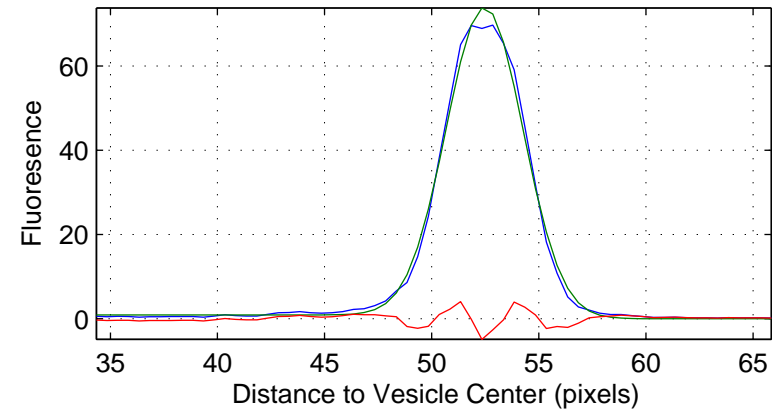

Ch:1 0326-vbb85-td248-0028.tif

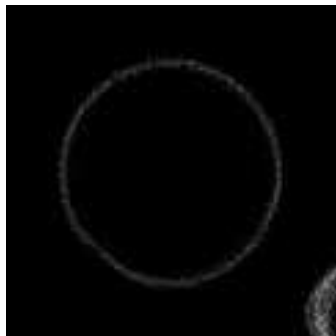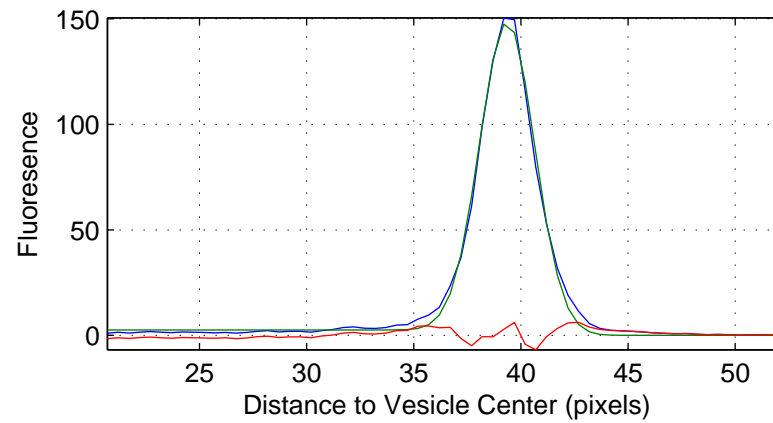

Ch:2 0326-vbb85-td248-0028.tif

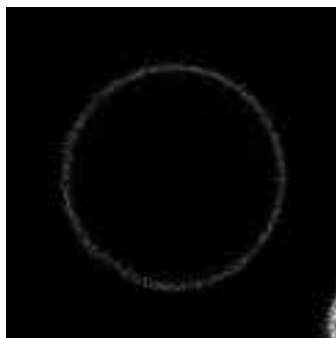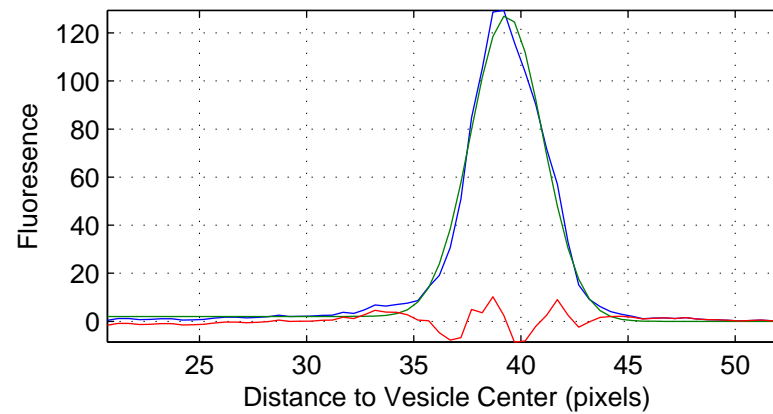

Ch:3 0326-vbb85-td248-0028.tif

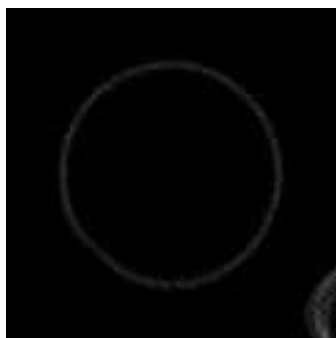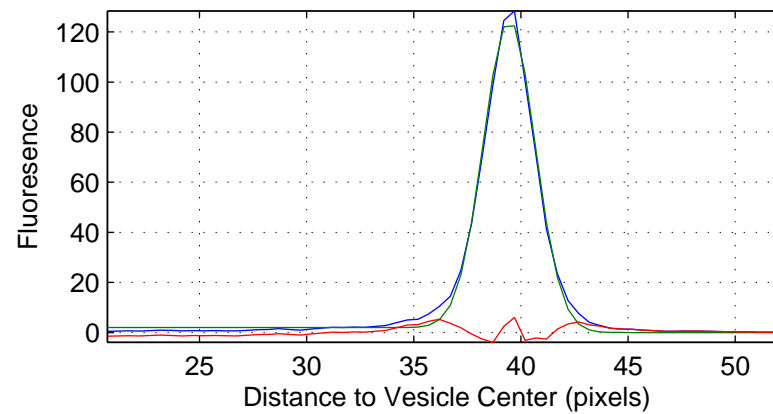

Ch:1 0326-vbb85-td248-0048.tif

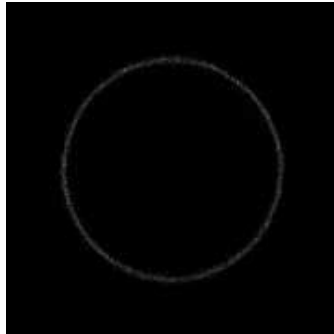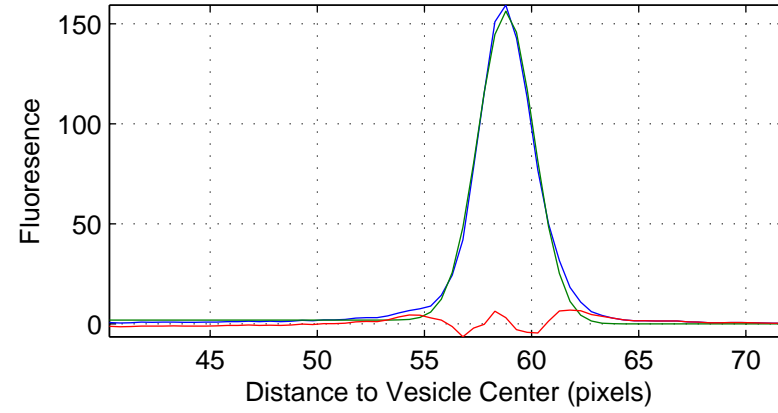

Ch:2 0326-vbb85-td248-0048.tif

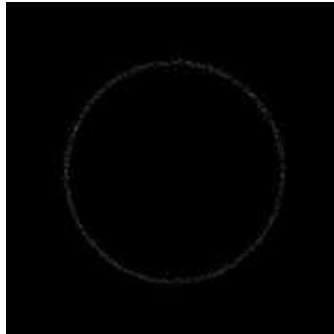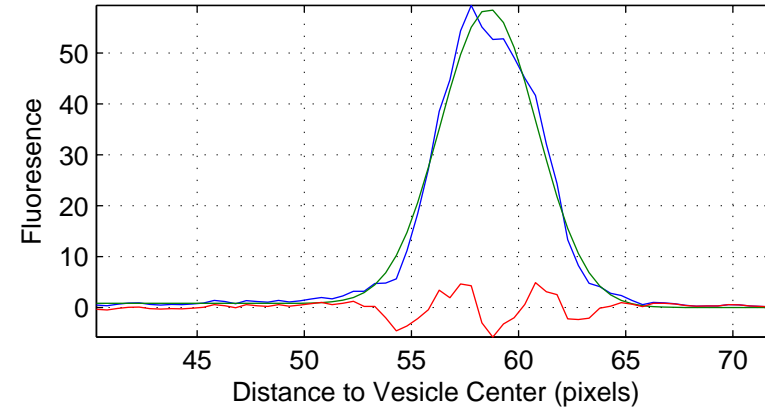

Ch:3 0326-vbb85-td248-0048.tif

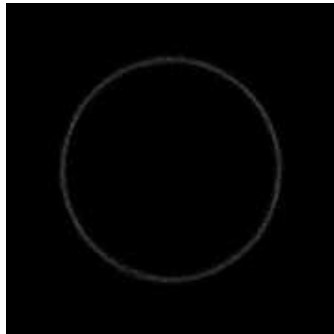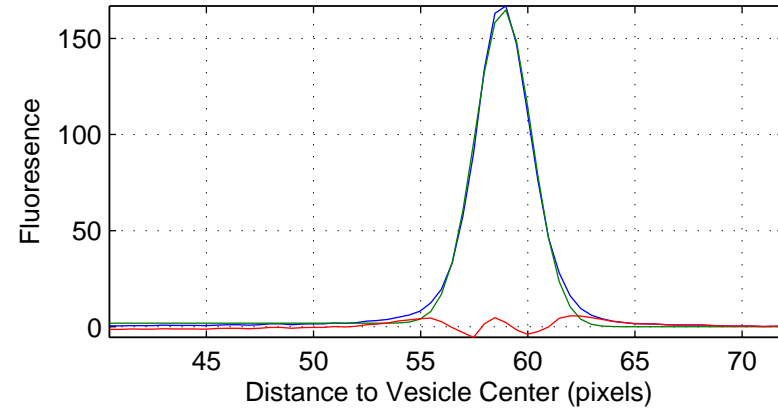

Ch:1 0326-vbb85-td248-0056.tif

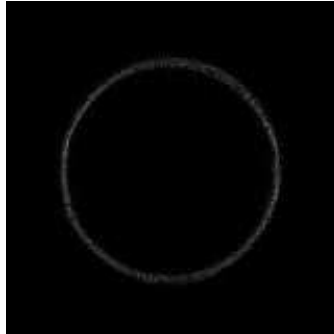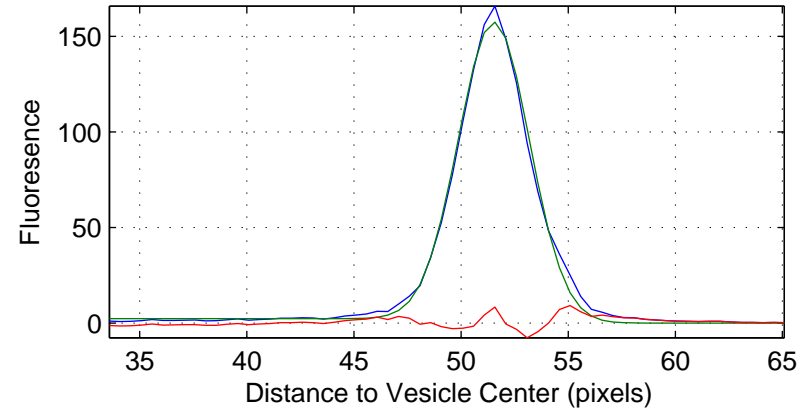

Ch:2 0326-vbb85-td248-0056.tif

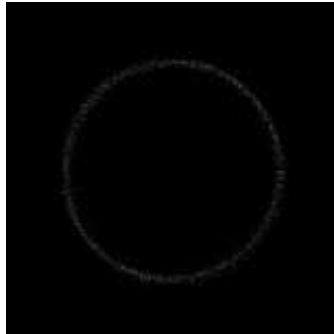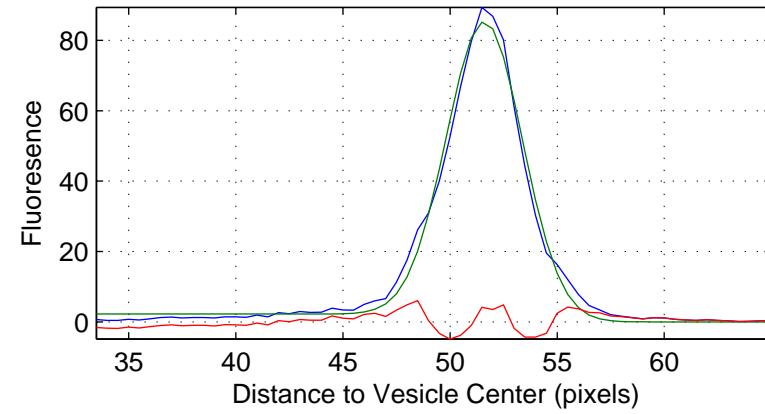

Ch:3 0326-vbb85-td248-0056.tif

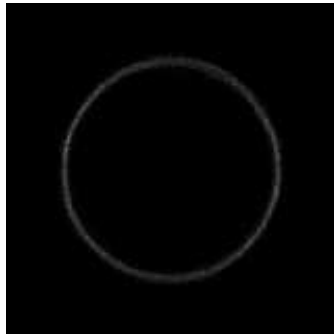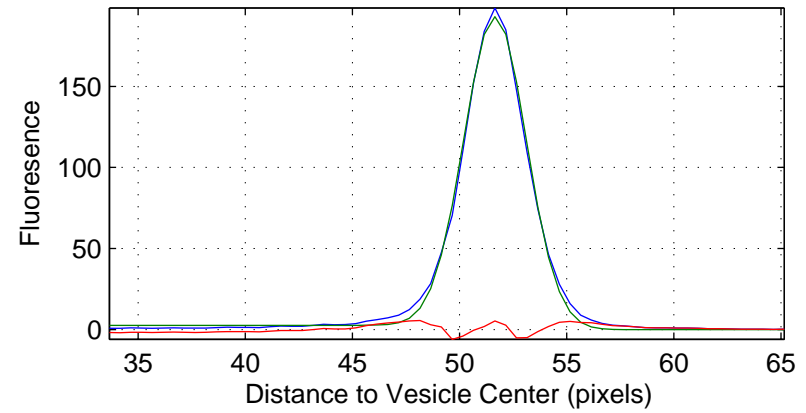

Ch:1 0326-vbb85-td248-0098.tif

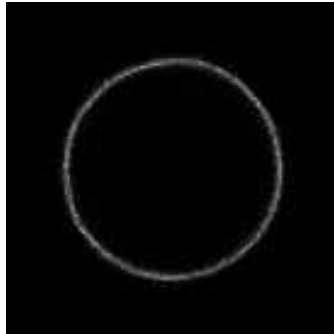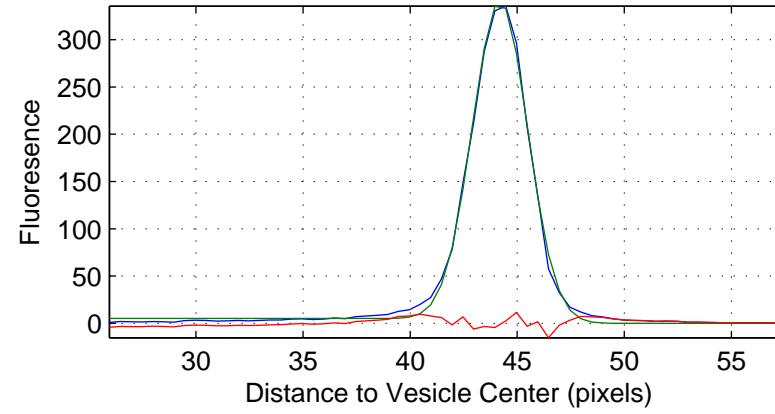

Ch:2 0326-vbb85-td248-0098.tif

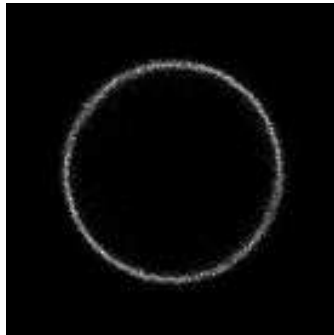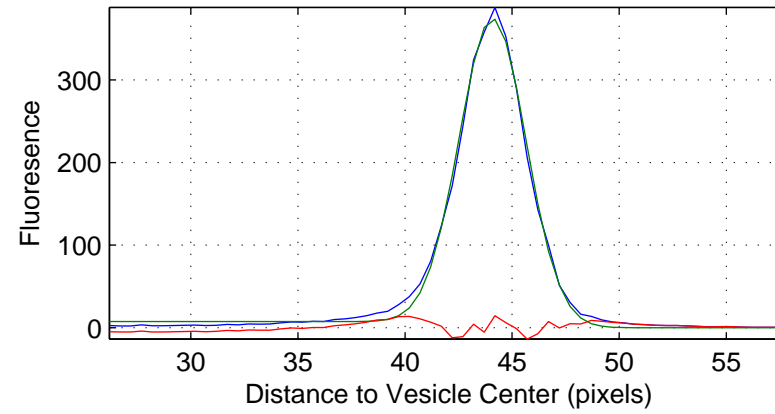

Ch:3 0326-vbb85-td248-0098.tif

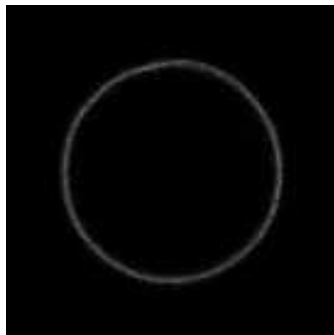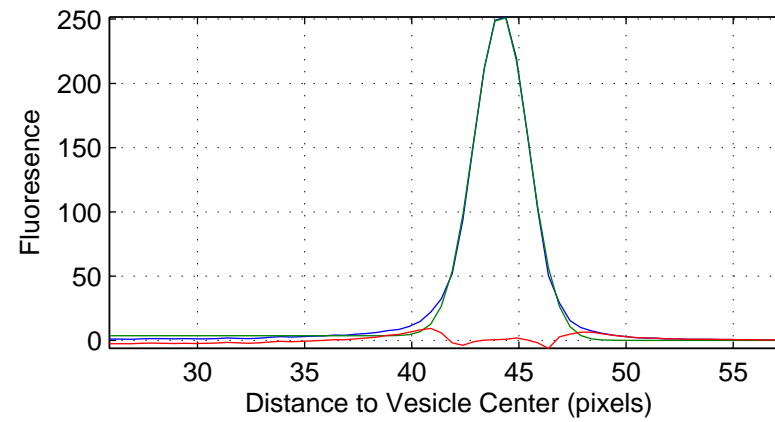

Ch:1 0323-vbb85-td248-0002.tif

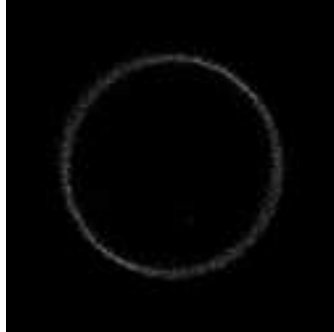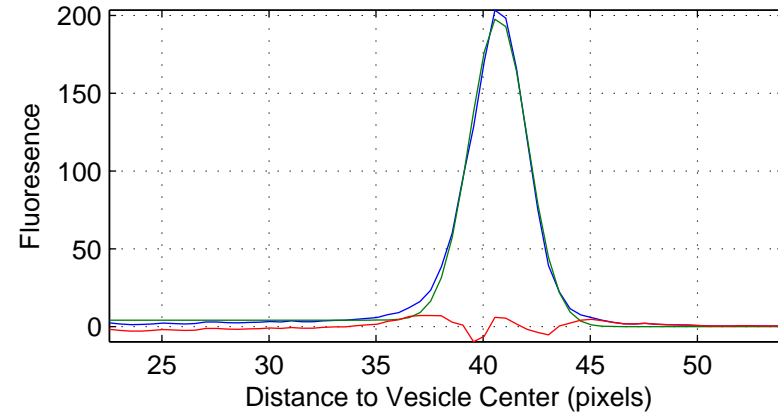

Ch:2 0323-vbb85-td248-0002.tif

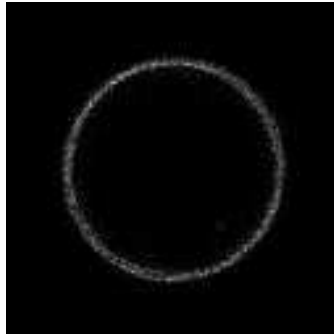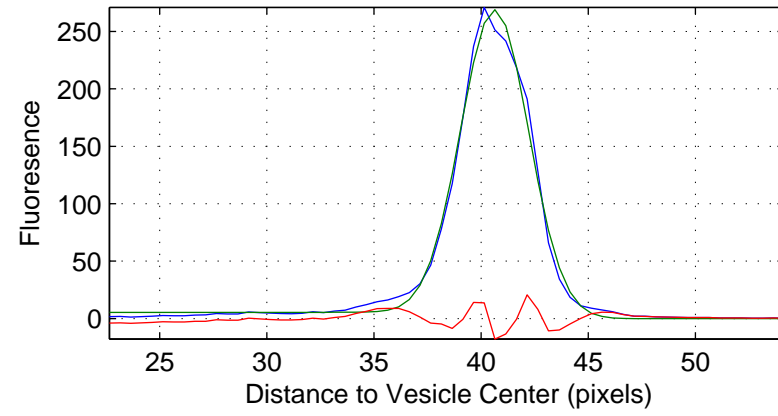

Ch:3 0323-vbb85-td248-0002.tif

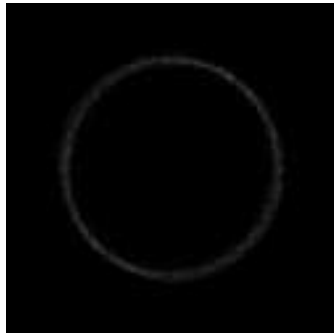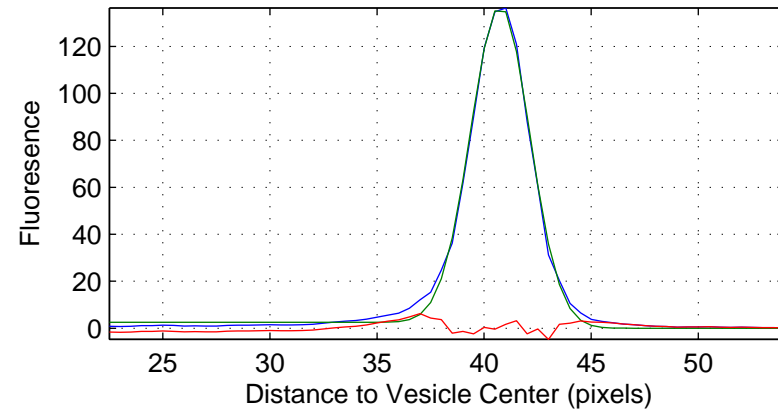

Ch:1 0323-vbb85-td248-0003.tif

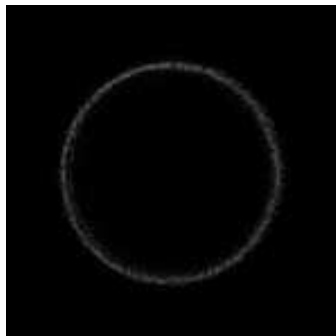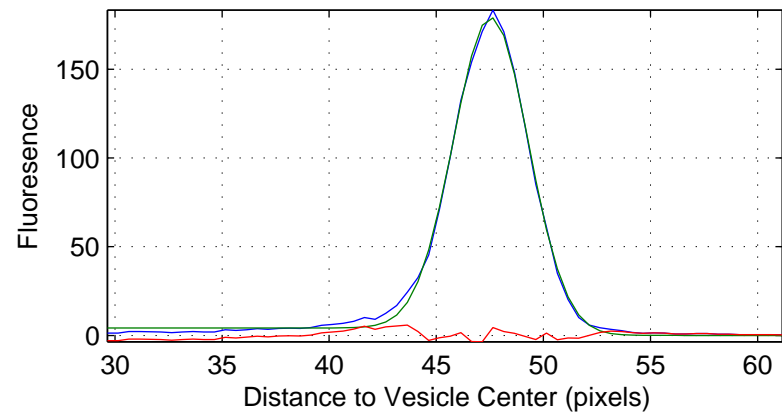

Ch:2 0323-vbb85-td248-0003.tif

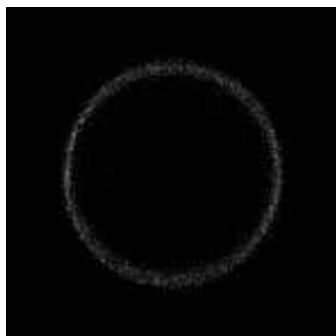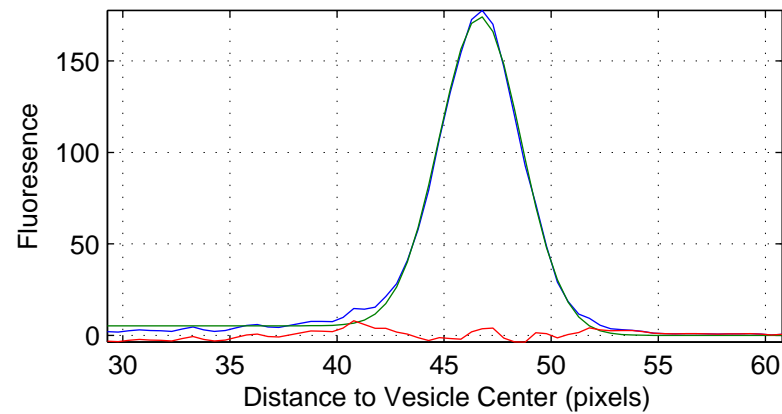

Ch:3 0323-vbb85-td248-0003.tif

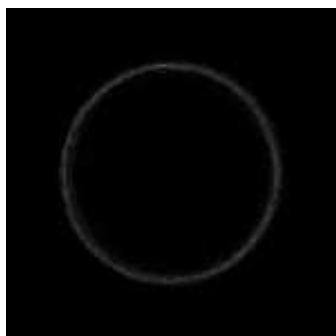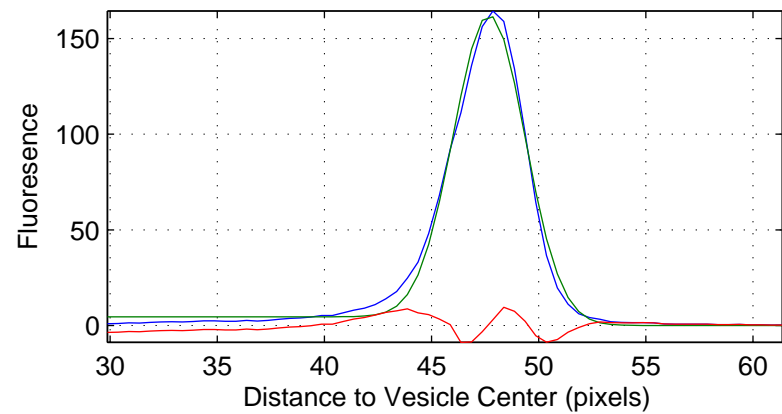

Ch:1 0323-vbb85-td248-0004.tif

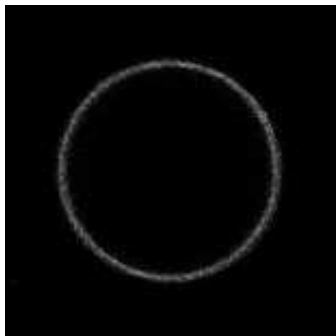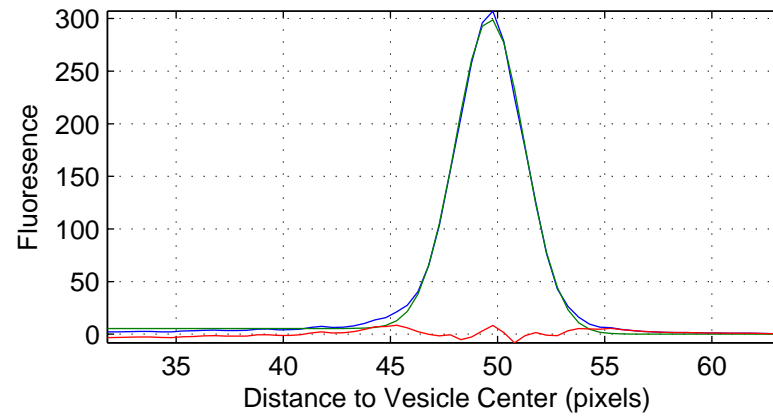

Ch:2 0323-vbb85-td248-0004.tif

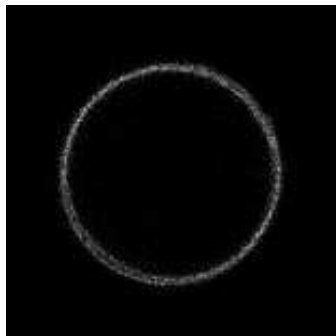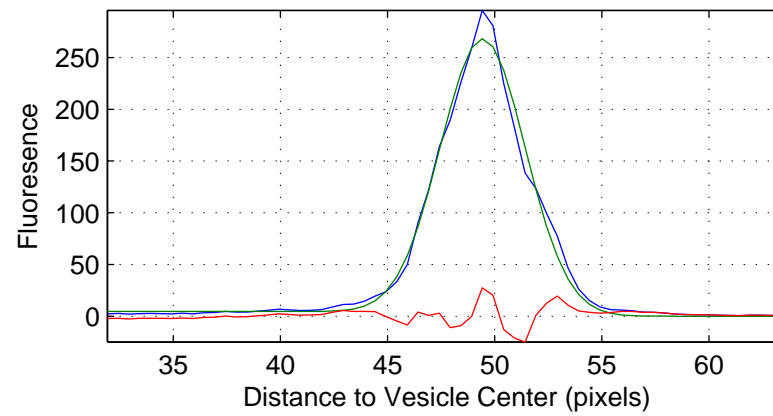

Ch:3 0323-vbb85-td248-0004.tif

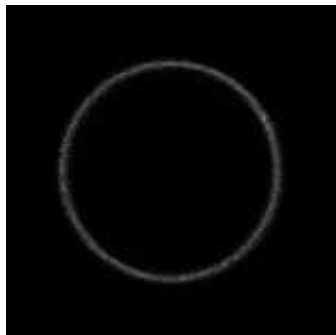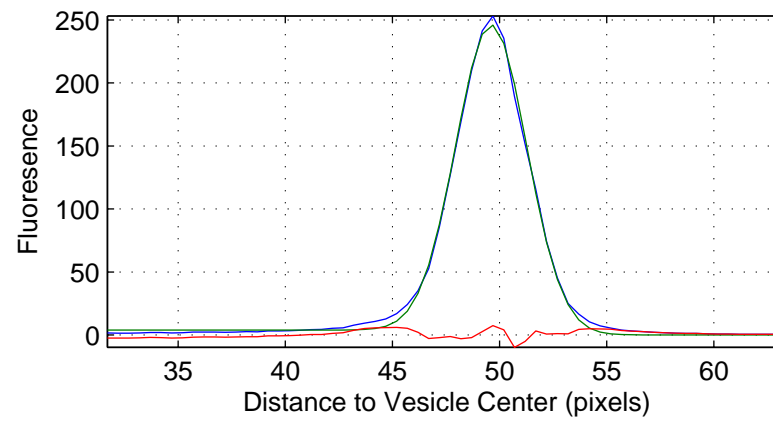



Ch:1 0323-vbb85-td248-0011.tif

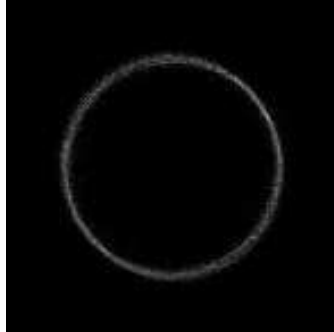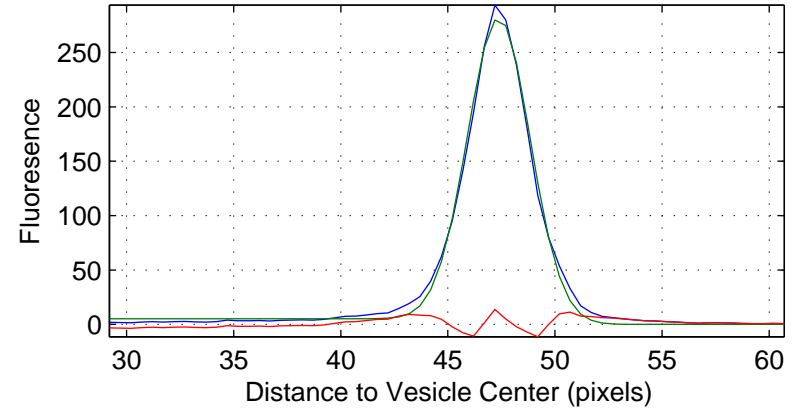

Ch:2 0323-vbb85-td248-0011.tif

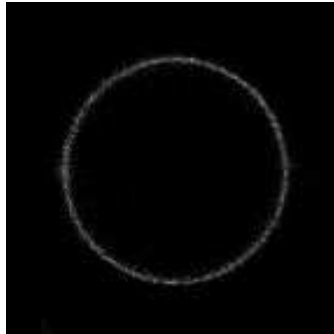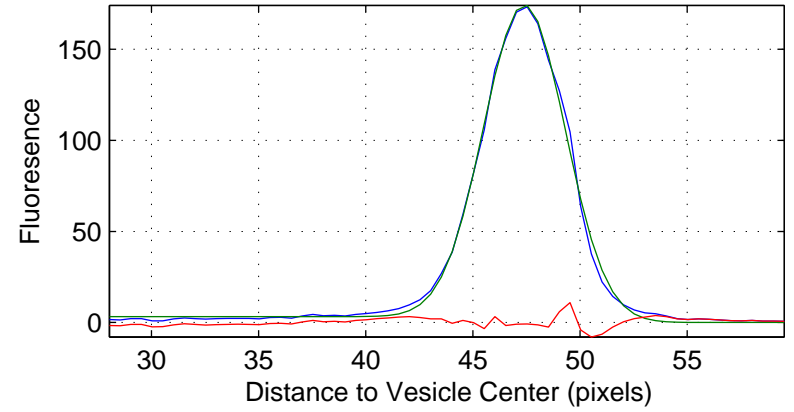

Ch:3 0323-vbb85-td248-0011.tif

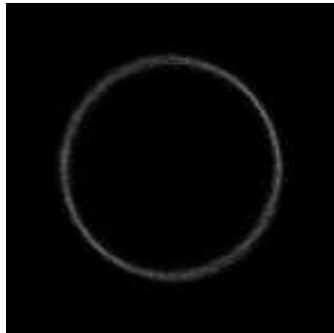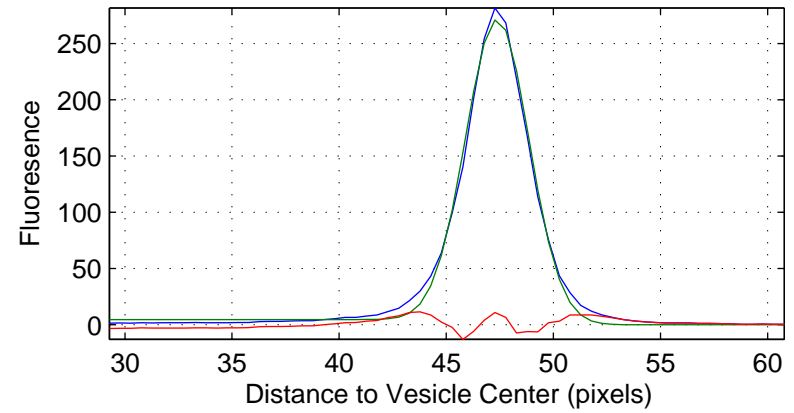

Ch:1 0323-vbb85-td248-0013.tif

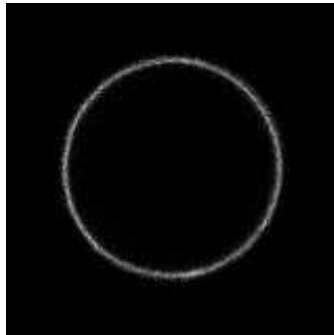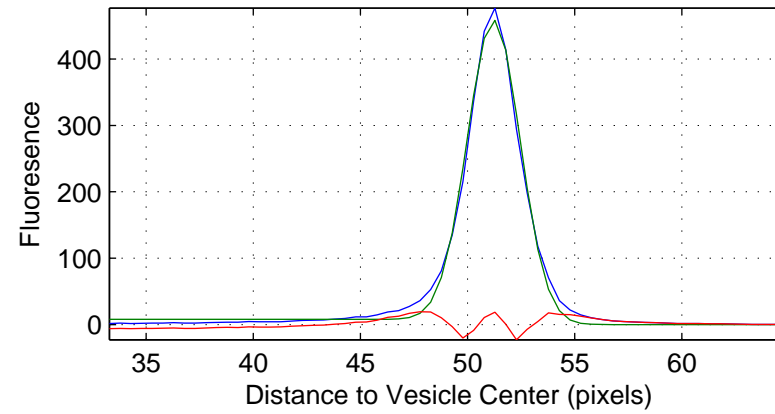

Ch:2 0323-vbb85-td248-0013.tif

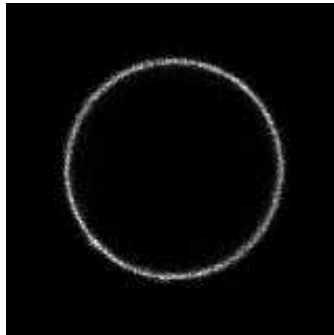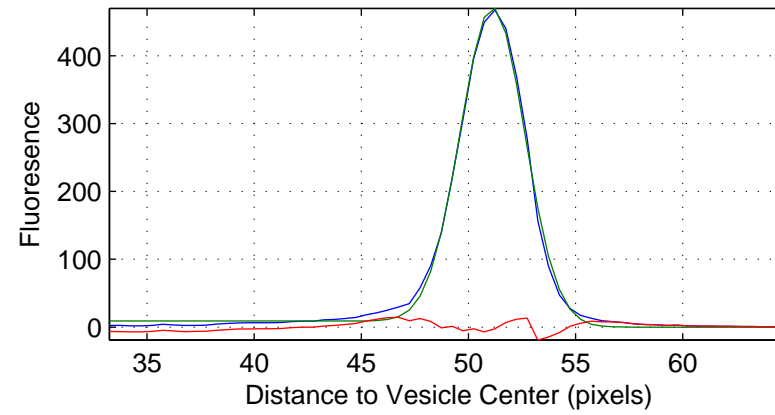

Ch:3 0323-vbb85-td248-0013.tif

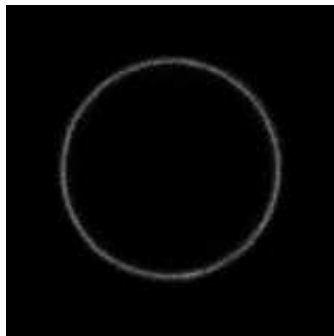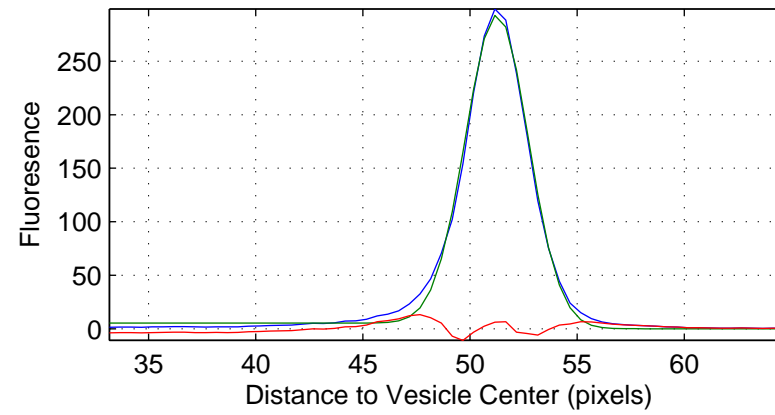

Ch:1 0323-vbb85-td248-0015.tif

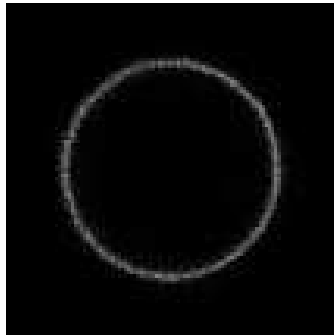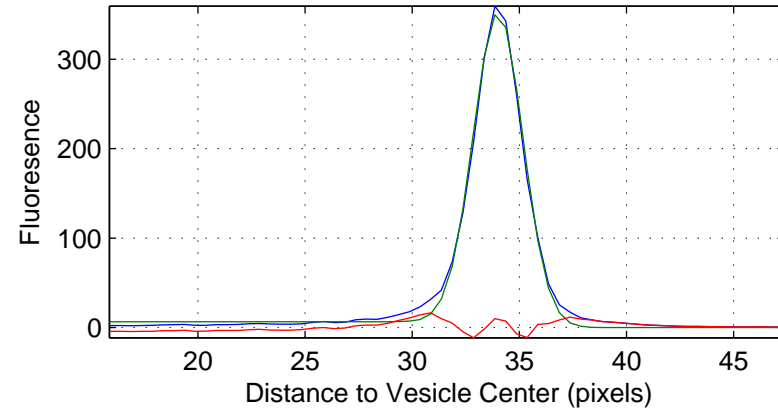

Ch:2 0323-vbb85-td248-0015.tif

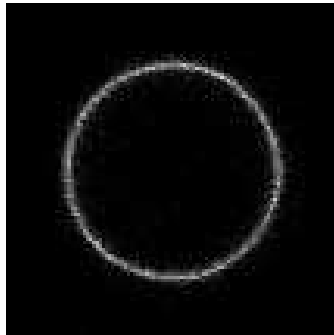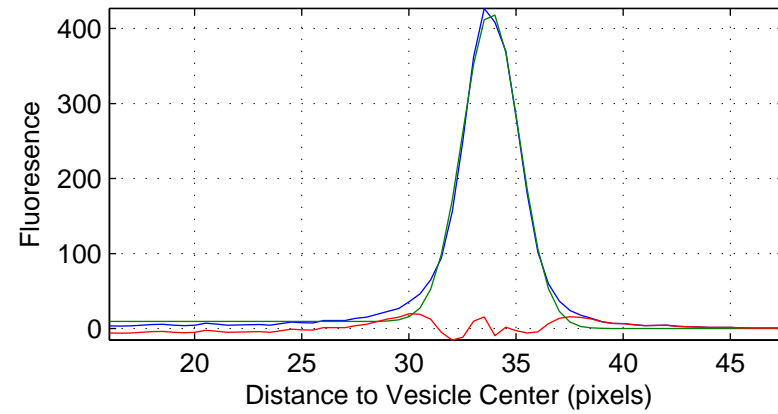

Ch:3 0323-vbb85-td248-0015.tif

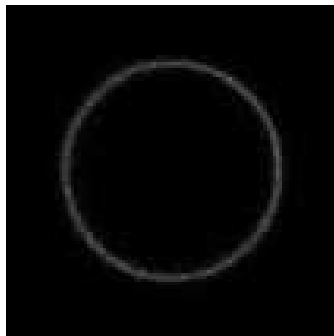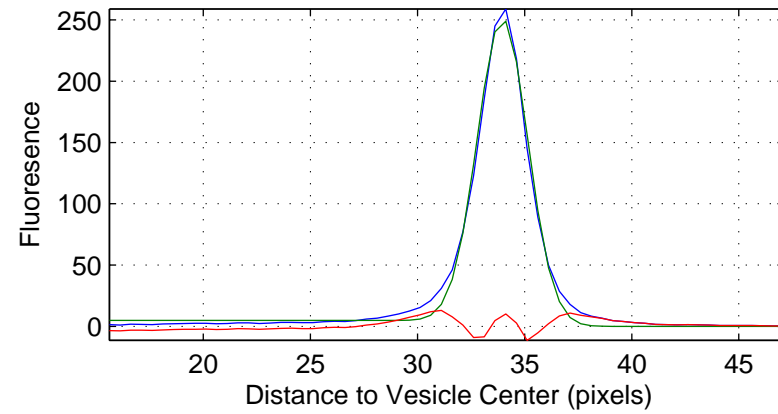

Ch:1 0323-vbb85-td248-0017.tif

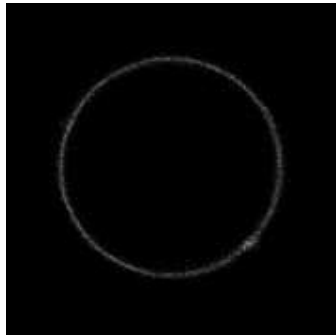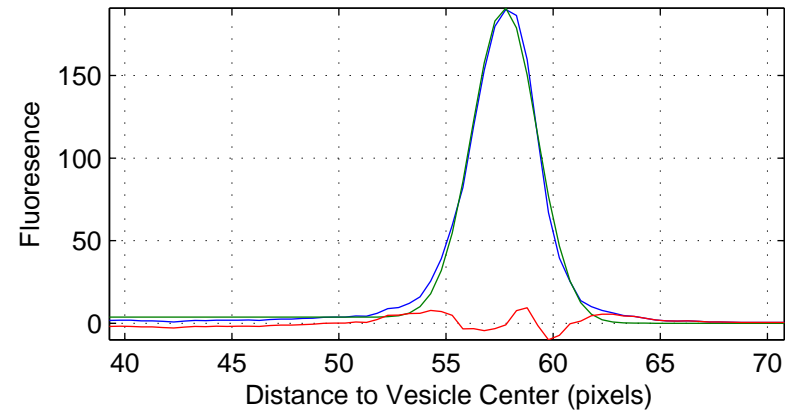

Ch:2 0323-vbb85-td248-0017.tif

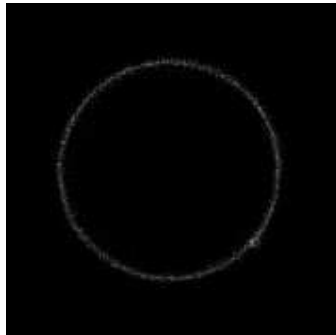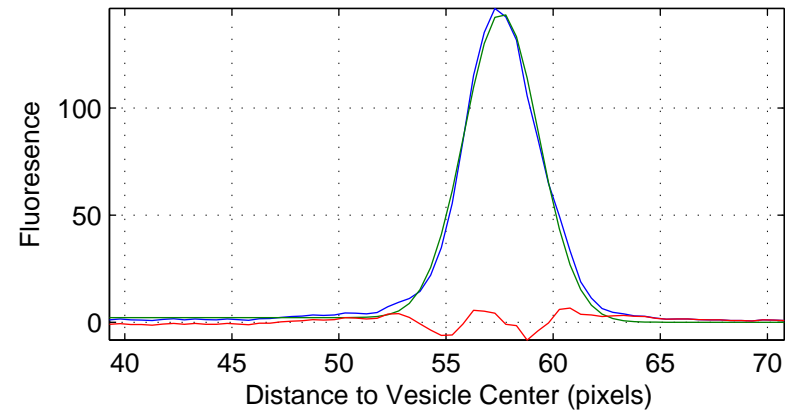

Ch:3 0323-vbb85-td248-0017.tif

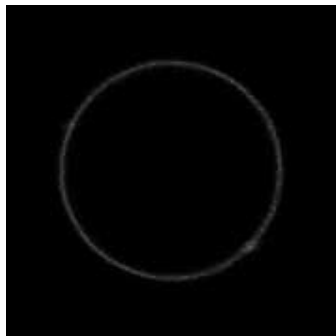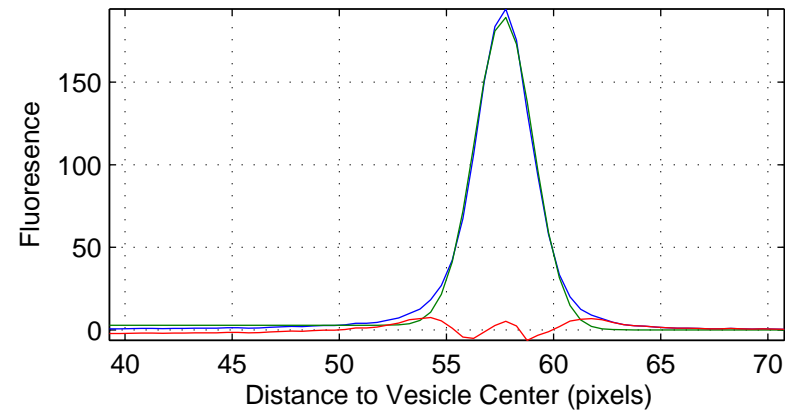

Ch:1 0323-vbb85-td248-0019.tif

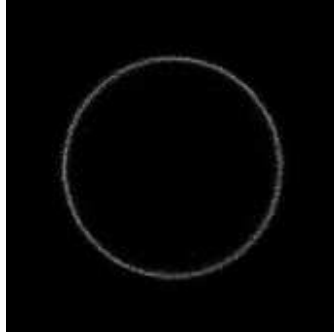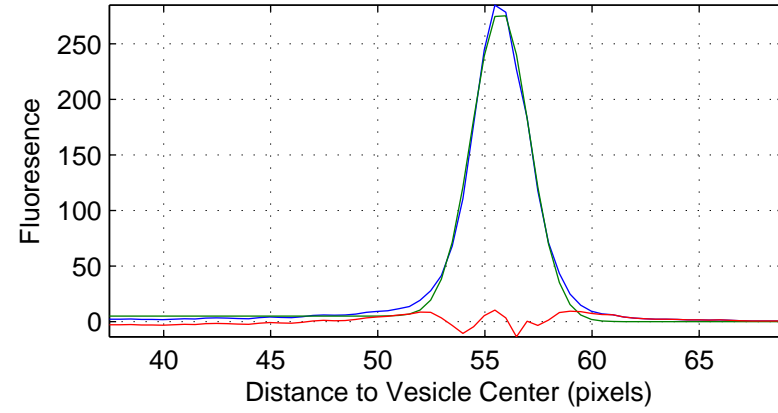

Ch:2 0323-vbb85-td248-0019.tif

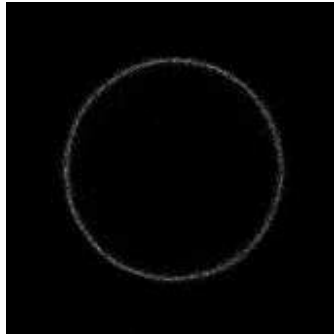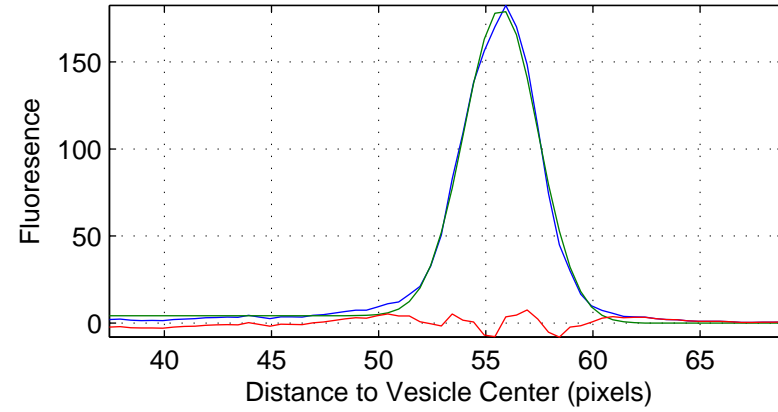

Ch:3 0323-vbb85-td248-0019.tif

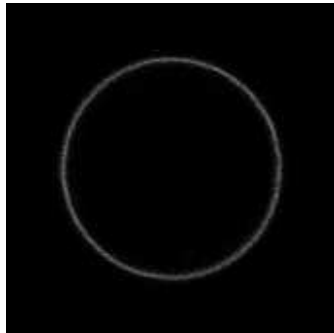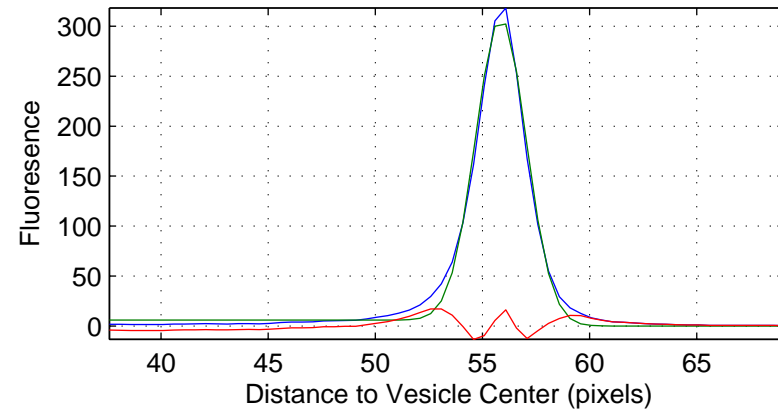

Ch:1 0323-vbb85-td248-0024.tif

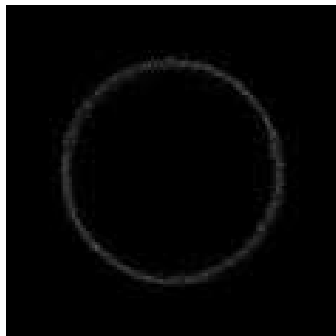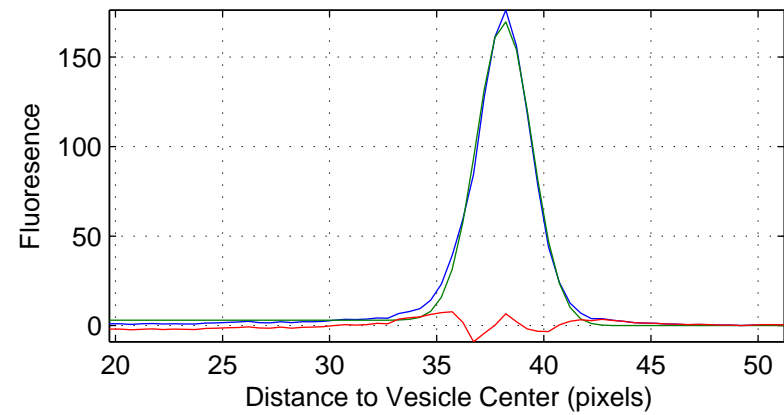

Ch:2 0323-vbb85-td248-0024.tif

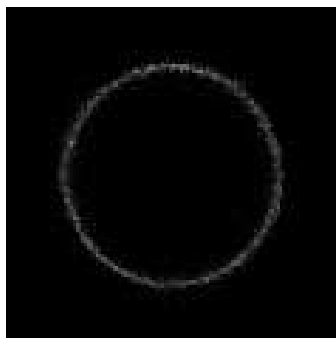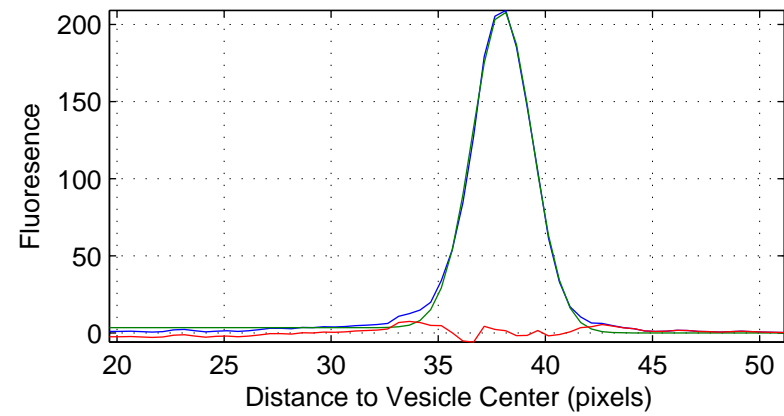

Ch:3 0323-vbb85-td248-0024.tif

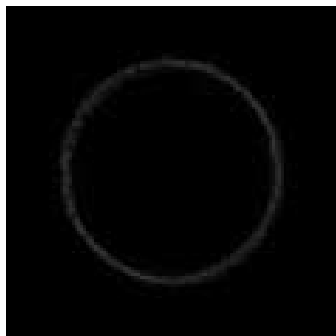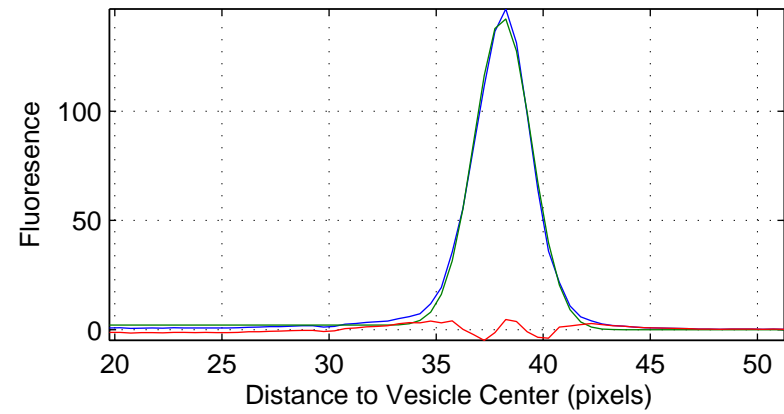

Ch:1 0323-vbb85-td248-0033.tif

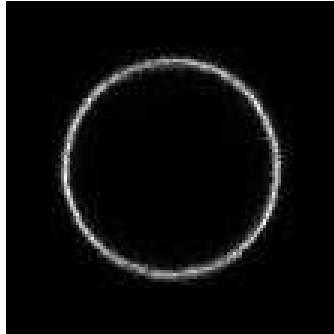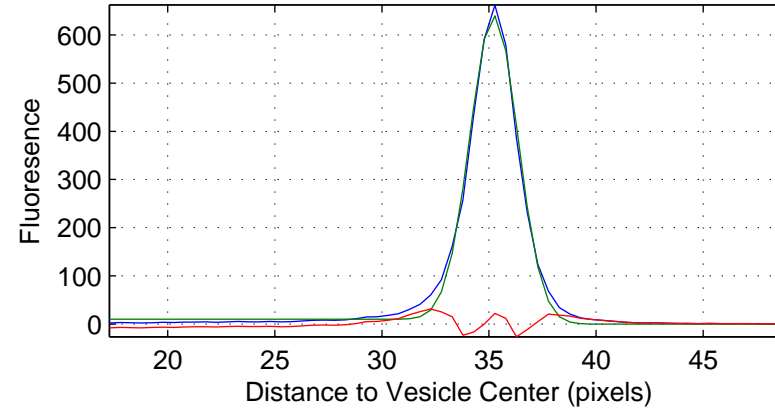

Ch:2 0323-vbb85-td248-0033.tif

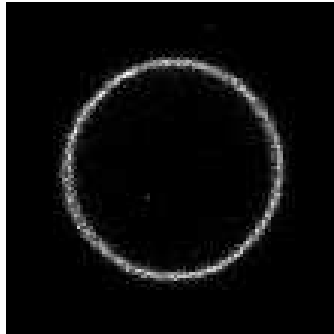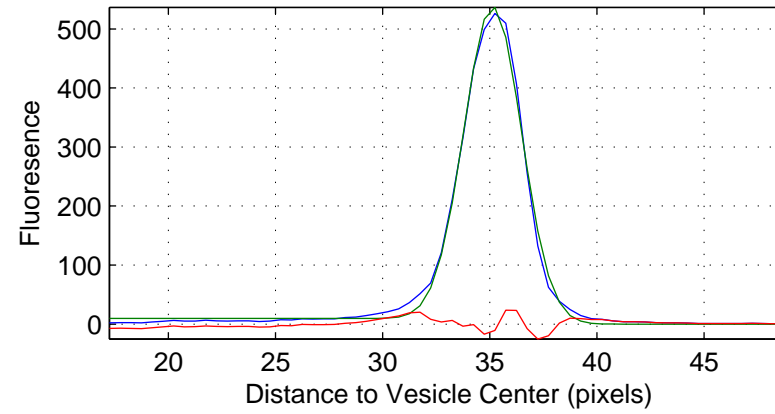

Ch:3 0323-vbb85-td248-0033.tif

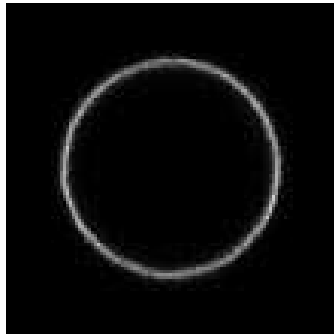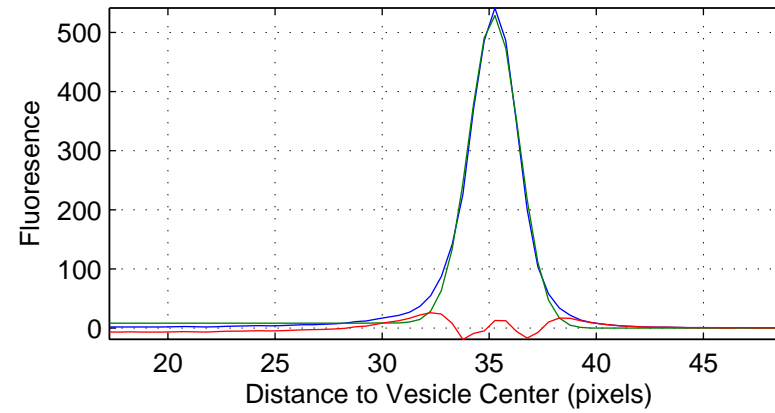

Ch:1 0323-vbb85-td248-0044.tif

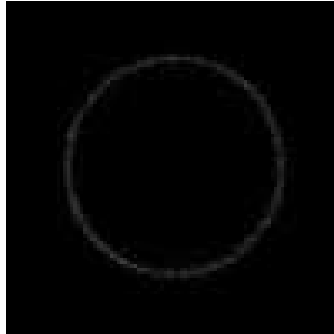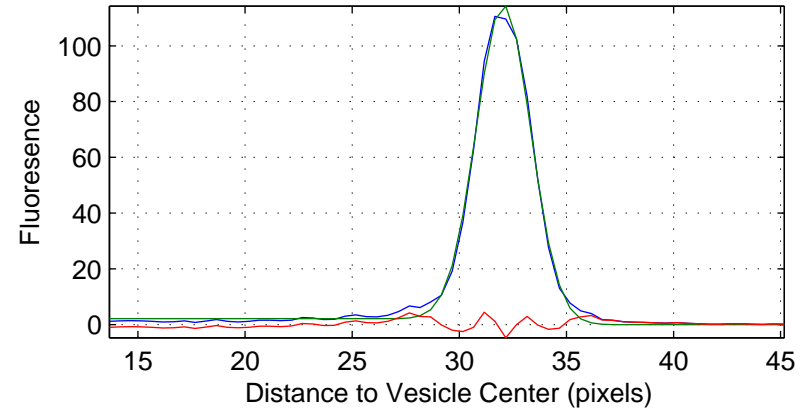

Ch:2 0323-vbb85-td248-0044.tif

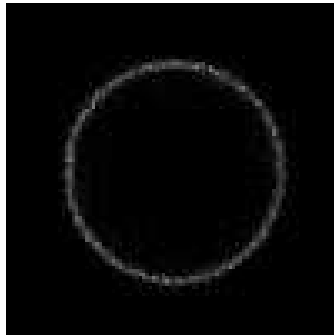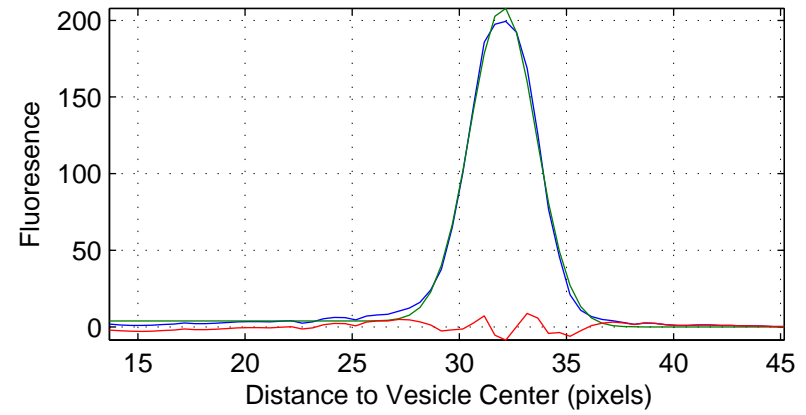

Ch:3 0323-vbb85-td248-0044.tif

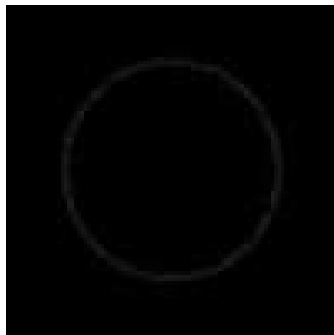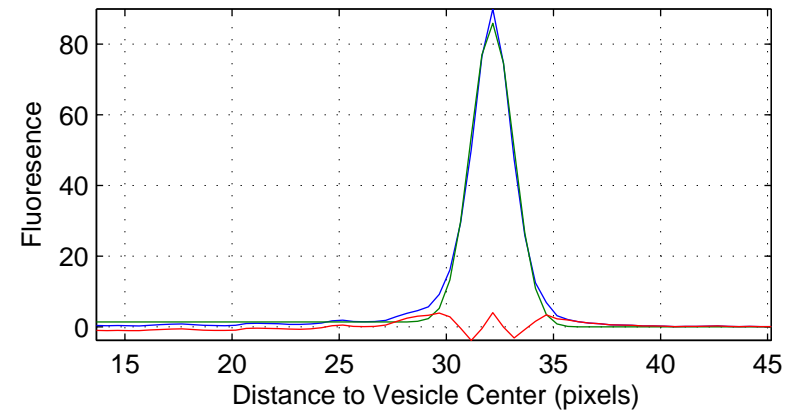



Ch:1 0323-vbb85-td248-0048.tif

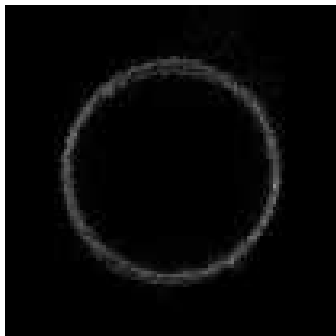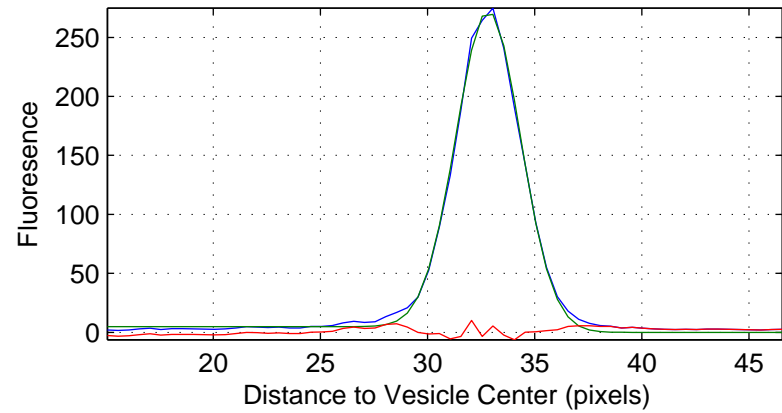

Ch:2 0323-vbb85-td248-0048.tif

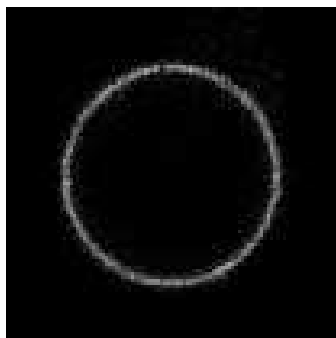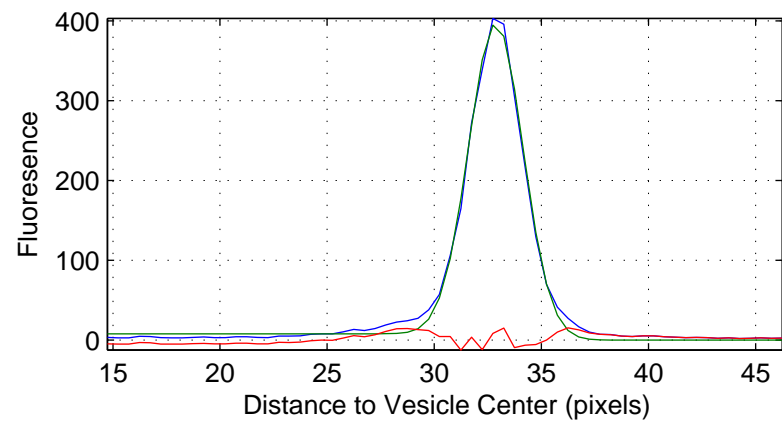

Ch:3 0323-vbb85-td248-0048.tif

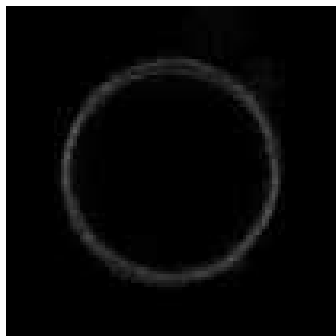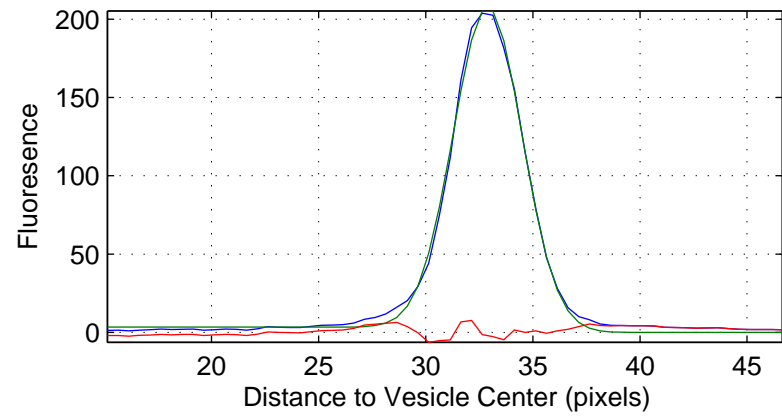

Ch:1 0323-vbb85-td248-0049.tif

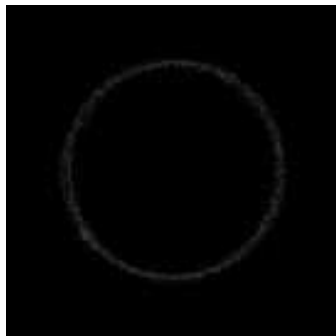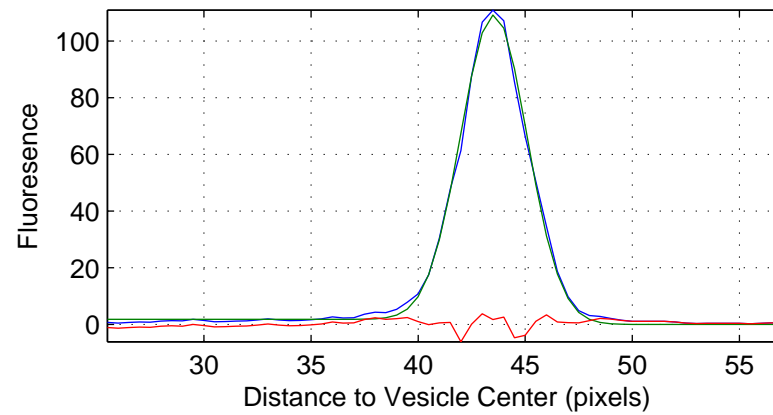

Ch:2 0323-vbb85-td248-0049.tif

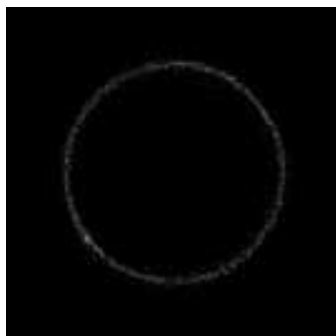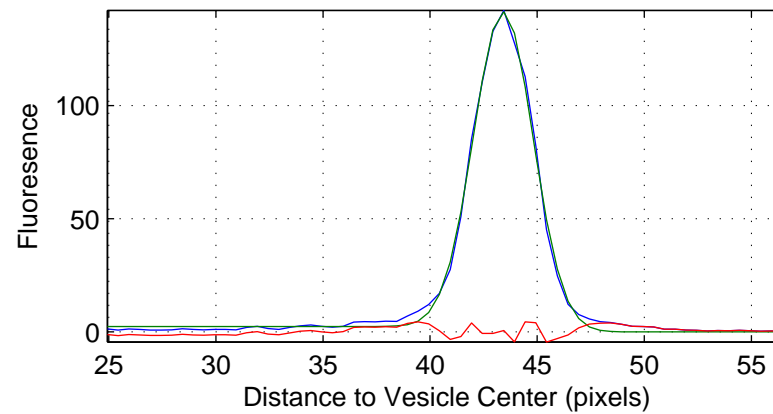

Ch:3 0323-vbb85-td248-0049.tif

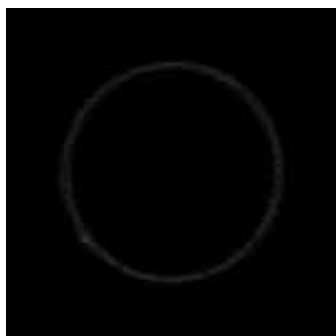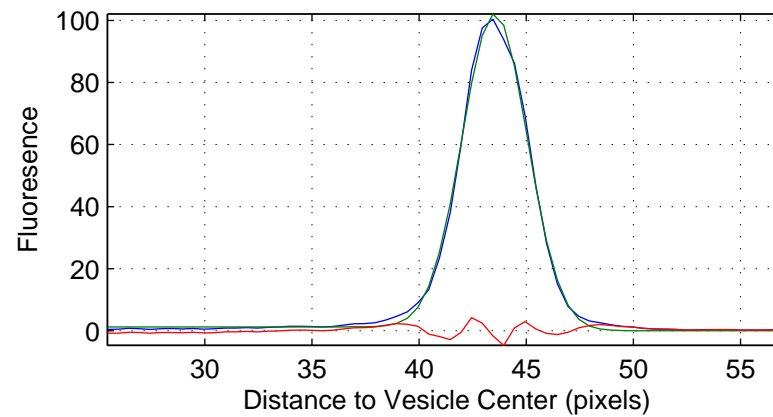

Ch:1 0323-vbb85-td248-0059.tif

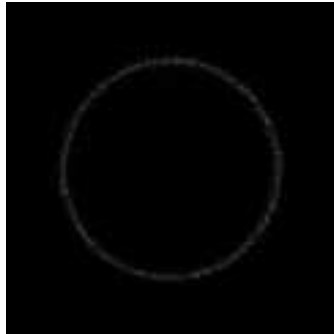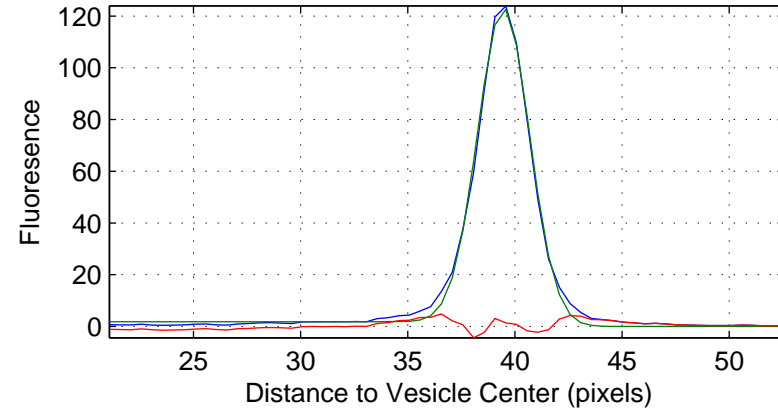

Ch:2 0323-vbb85-td248-0059.tif

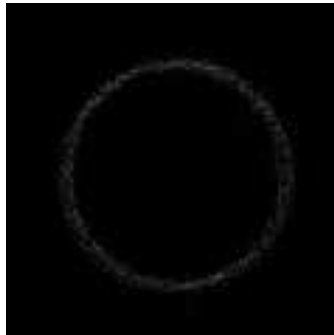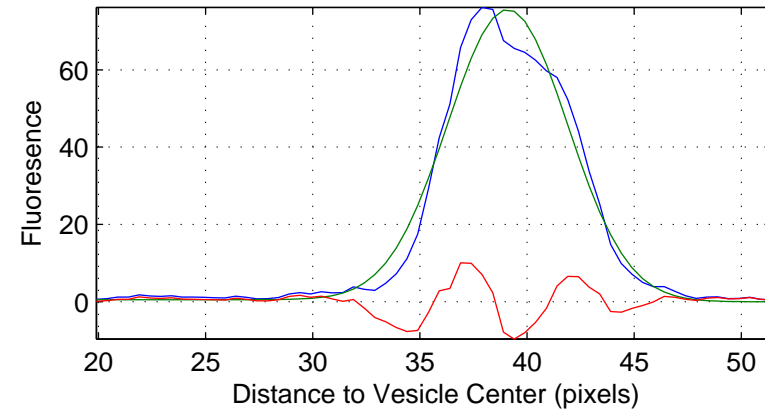

Ch:3 0323-vbb85-td248-0059.tif

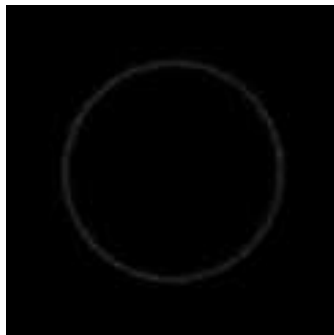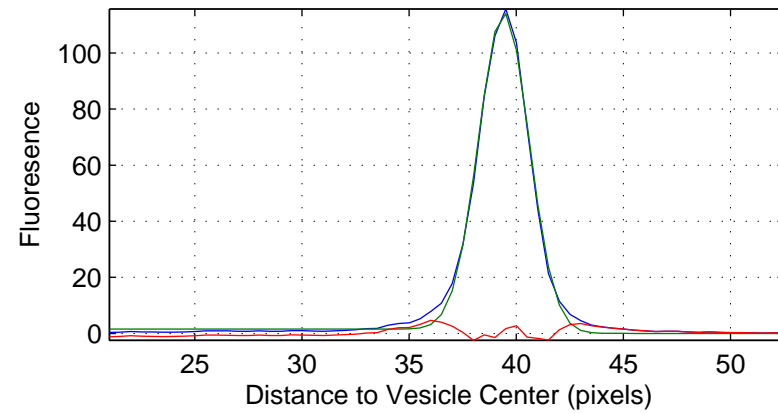

Ch:1 0323-vbb85-td248-0072.tif

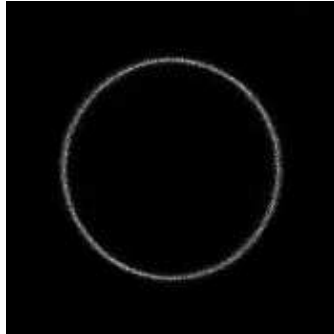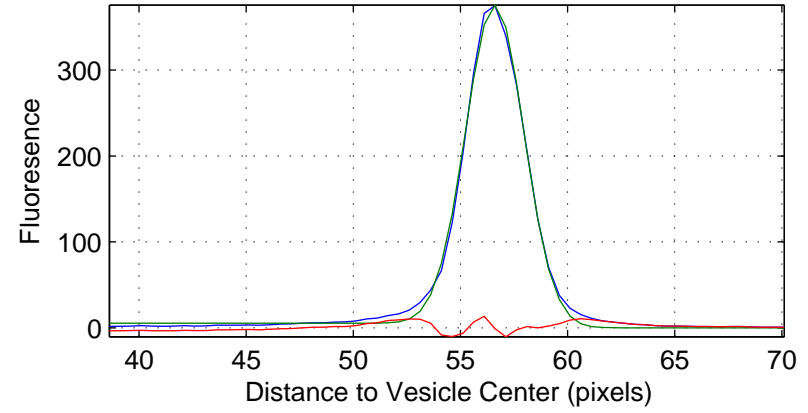

Ch:2 0323-vbb85-td248-0072.tif

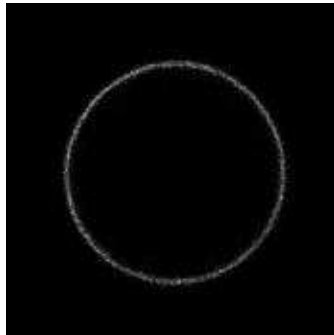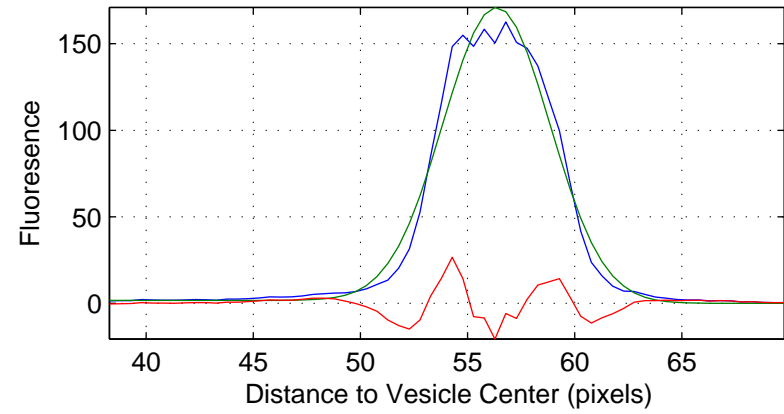

Ch:3 0323-vbb85-td248-0072.tif

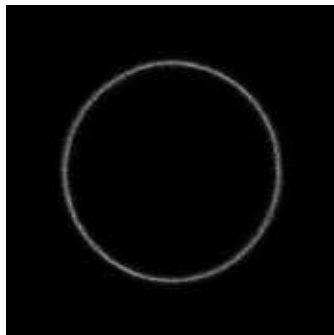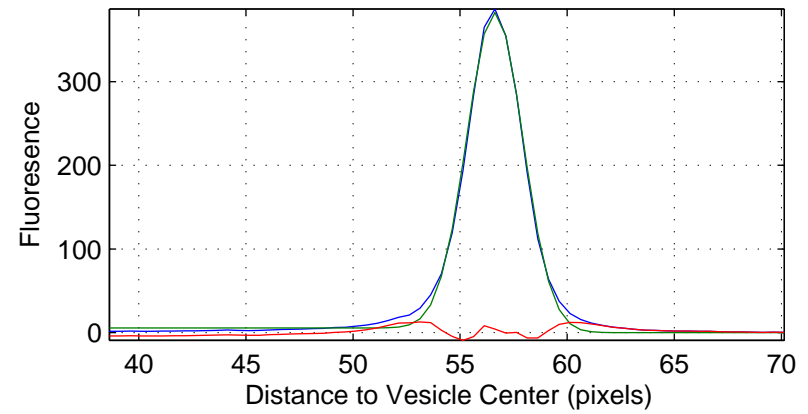

Supplement: mmc1.pdf [file mmc1.pdf]
